# Supplementary material for: Ligand sensing enhances bacterial flagellar motor output via stator recruitment
Source: eLife journal article supplement (doi:10.7554/elife.62848), 2021-04-06
Supplement: supp [file elife-62848-supp-v1.zip]

Archive with 14 entries (14 files):
- elife_poa_e62848_Transparent_Reporting_File.docx
- elife_poa_e62848_Figure_2_figure_supplement_1.pdf
- elife_poa_e62848_Figure_2_figure_supplement_2.pdf
- elife_poa_e62848_Figure_2_source_data_1.xlsx
- elife_poa_e62848_Figure_3_figure_supplement_1.pdf
- elife_poa_e62848_Figure_3_figure_supplement_2.pdf
- elife_poa_e62848_Figure_3_figure_supplement_3.pdf
- elife_poa_e62848_Figure_3_figure_supplement_4.pdf
- elife_poa_e62848_Figure_3_figure_supplement_5.pdf
- elife_poa_e62848_Figure_3_figure_supplement_6.pdf
- elife_poa_e62848_Figure_3_figure_supplement_7.pdf
- elife_poa_e62848_Figure_3_source_data_1.xlsx
- elife_poa_e62848_Figure_4_figure_supplement_1.pdf
- elife_poa_e62848_Figure_4_source_data_1.xlsx
