# Supplementary material for: Ligand sensing enhances bacterial flagellar motor output via stator recruitment
Source: eLife journal article supplement (doi:10.7554/elife.62848), 2021-04-06
Supplement: supp [file elife-62848-supp-v1.zip › elife_poa_e62848_Figure_2_source_data_1.xlsx]

## Sheet: Fig 2 (A)_single cell
	Response to Glucose
	Hz	Time (seconds)
	3.74266	-0.0166667
	9.60108	-0.0333333
	7.31376	-0.05
	4.3406	-0.0666667
	2.86688	-0.0833333
	7.33427	-0.1
	6.4515	-0.116667
	8.33889	-0.133333
	5.44742	-0.15
	8.75182	-0.166667
	7.01255	-0.183333
	7.29306	-0.2
	7.3344	-0.216667
	9.94579	-0.233333
	5.41293	-0.25
	8.14383	-0.266667
	6.08979	-0.283333
	5.64464	-0.3
	7.91617	-0.316667
	7.16642	-0.333333
	1.17802	-0.35
	1.28286	-0.366667
	1.34828	-0.383333
	2.40696	-0.4
	3.27133	-0.416667
	11.7882	-0.433333
	7.09226	-0.45
	8.09707	-0.466667
	5.19205	-0.483333
	6.53567	-0.5
	8.32648	-0.516667
	7.13171	-0.533333
	7.24272	-0.55
	6.80825	-0.566667
	5.34696	-0.583333
	4.02478	-0.6
	7.40376	-0.616667
	5.29238	-0.633333
	1.67173	-0.65
	8.21691	-0.666667
	8.14853	-0.683333
	4.48615	-0.7
	4.27124	-0.716667
	6.49793	-0.733333
	7.73586	-0.75
	4.59852	-0.766667
	7.84003	-0.783333
	6.98331	-0.8
	9.1679	-0.816667
	4.01773	-0.833333
	7.19973	-0.85
	6.3852	-0.866667
	3.29972	-0.883333
	8.22486	-0.9
	5.77571	-0.916667
	4.72353	-0.933333
	7.79835	-0.95
	6.57162	-0.966667
	6.86453	-0.983333
	7.01748	-1
	7.28044	-1.01667
	3.72898	-1.03333
	7.58629	-1.05
	5.08168	-1.06667
	8.42809	-1.08333
	5.13895	-1.1
	6.04366	-1.11667
	7.14878	-1.13333
	2.19338	-1.15
	6.18171	-1.16667
	4.15157	-1.18333
	5.73686	-1.2
	4.36377	-1.21667
	6.7582	-1.23333
	2.39225	-1.25
	4.07473	-1.26667
	7.49533	-1.28333
	3.30841	-1.3
	4.18676	-1.31667
	2.34474	-1.33333
	1.6811	-1.35
	1.82778	-1.36667
	6.94356	-1.38333
	4.22006	-1.4
	4.93861	-1.41667
	7.19424	-1.43333
	5.54703	-1.45
	8.93426	-1.46667
	7.81329	-1.48333
	6.8475	-1.5
	3.29166	-1.51667
	7.85254	-1.53333
	9.53429	-1.55
	3.64919	-1.56667
	6.28008	-1.58333
	5.1181	-1.6
	8.16047	-1.61667
	3.86018	-1.63333
	5.39586	-1.65
	5.65004	-1.66667
	2.58823	-1.68333
	5.01022	-1.7
	4.82452	-1.71667
	6.98558	-1.73333
	8.43692	-1.75
	7.46143	-1.76667
	6.20441	-1.78333
	5.37183	-1.8
	1.64389	-1.81667
	2.4493	-1.83333
	4.30891	-1.85
	6.29846	-1.86667
	5.03842	-1.88333
	2.23548	-1.9
	5.45349	-1.91667
	5.08126	-1.93333
	4.74714	-1.95
	2.36411	-1.96667
	3.52215	-1.98333
	2.68	-2
	4.23702	-2.01667
	6.77844	-2.03333
	1.17939	-2.05
	3.5133	-2.06667
	3.83154	-2.08333
	4.49835	-2.1
	4.48218	-2.11667
	4.69343	-2.13333
	7.86996	-2.15
	5.64221	-2.16667
	6.68998	-2.18333
	5.12681	-2.2
	4.7985	-2.21667
	10.3572	-2.23333
	8.67853	-2.25
	6.12026	-2.26667
	5.84628	-2.28333
	9.6058	-2.3
	3.48341	-2.31667
	7.1381	-2.33333
	8.14506	-2.35
	6.74151	-2.36667
	8.43744	-2.38333
	8.70121	-2.4
	7.51688	-2.41667
	8.52394	-2.43333
	7.1853	-2.45
	6.70269	-2.46667
	7.97623	-2.48333
	10.3994	-2.5
	5.88674	-2.51667
	7.25881	-2.53333
	3.72031	-2.55
	5.27049	-2.56667
	9.72686	-2.58333
	8.21391	-2.6
	6.77651	-2.61667
	8.53015	-2.63333
	10.2871	-2.65
	6.70787	-2.66667
	3.17748	-2.68333
	8.71799	-2.7
	6.66096	-2.71667
	7.73019	-2.73333
	5.6346	-2.75
	8.82238	-2.76667
	6.56282	-2.78333
	7.10648	-2.8
	5.1438	-2.81667
	3.48897	-2.83333
	2.75179	-2.85
	7.92483	-2.86667
	9.48547	-2.88333
	5.26071	-2.9
	3.31093	-2.91667
	6.1283	-2.93333
	5.05926	-2.95
	6.27208	-2.96667
	8.31141	-2.98333
	4.70209	-3
	6.45345	-3.01667
	5.61394	-3.03333
	6.7094	-3.05
	7.55272	-3.06667
	3.5977	-3.08333
	6.03645	-3.1
	6.62131	-3.11667
	4.53381	-3.13333
	8.48469	-3.15
	5.01915	-3.16667
	9.04342	-3.18333
	11.386	-3.2
	7.65177	-3.21667
	4.78068	-3.23333
	10.5169	-3.25
	6.75009	-3.26667
	8.1717	-3.28333
	8.11667	-3.3
	8.51715	-3.31667
	9.46613	-3.33333
	6.95465	-3.35
	4.2895	-3.36667
	9.61158	-3.38333
	7.86607	-3.4
	5.05261	-3.41667
	6.32182	-3.43333
	5.21727	-3.45
	9.73904	-3.46667
	4.57856	-3.48333
	6.24555	-3.5
	5.47802	-3.51667
	10.183	-3.53333
	8.3245	-3.55
	3.41269	-3.56667
	4.84861	-3.58333
	8.64068	-3.6
	6.11925	-3.61667
	7.29707	-3.63333
	3.96232	-3.65
	3.15113	-3.66667
	6.60452	-3.68333
	5.80468	-3.7
	2.4899	-3.71667
	6.33702	-3.73333
	6.49084	-3.75
	4.59132	-3.76667
	7.28997	-3.78333
	11.3407	-3.8
	8.80482	-3.81667
	10.5247	-3.83333
	7.1008	-3.85
	8.74251	-3.86667
	8.10159	-3.88333
	9.86445	-3.9
	9.55358	-3.91667
	4.32139	-3.93333
	10.6451	-3.95
	8.45609	-3.96667
	5.96495	-3.98333
	5.77143	-4
	7.70018	-4.01667
	11.8339	-4.03333
	5.91565	-4.05
	6.39706	-4.06667
	11.3979	-4.08333
	11.0371	-4.1
	4.82109	-4.11667
	8.55551	-4.13333
	9.8604	-4.15
	5.74905	-4.16667
	7.75948	-4.18333
	10.0139	-4.2
	8.77583	-4.21667
	3.39422	-4.23333
	5.86769	-4.25
	10.3056	-4.26667
	8.61552	-4.28333
	4.40394	-4.3
	8.07935	-4.31667
	8.28684	-4.33333
	4.27922	-4.35
	7.62952	-4.36667
	3.21394	-4.38333
	3.96262	-4.4
	3.69194	-4.41667
	4.83997	-4.43333
	10.6343	-4.45
	7.02617	-4.46667
	4.89866	-4.48333
	10.9444	-4.5
	5.18402	-4.51667
	9.70207	-4.53333
	3.4939	-4.55
	7.30339	-4.56667
	10.7458	-4.58333
	6.411	-4.6
	6.06056	-4.61667
	8.50089	-4.63333
	5.89268	-4.65
	7.48226	-4.66667
	7.59321	-4.68333
	10.3111	-4.7
	5.99882	-4.71667
	8.25418	-4.73333
	5.99944	-4.75
	4.79736	-4.76667
	9.00333	-4.78333
	7.11412	-4.8
	3.30382	-4.81667
	5.10918	-4.83333
	2.74746	-4.85
	7.50779	-4.86667
	6.49592	-4.88333
	4.28343	-4.9
	7.85019	-4.91667
	2.82726	-4.93333
	8.64329	-4.95
	4.13107	-4.96667
	4.49645	-4.98333
	3.4594	-5
	4.97628	-5.01667
	5.92292	-5.03333
	4.29835	-5.05
	4.65212	-5.06667
	10.3074	-5.08333
	7.08682	-5.1
	8.39248	-5.11667
	9.23313	-5.13333
	7.03826	-5.15
	3.79689	-5.16667
	5.33396	-5.18333
	10.0364	-5.2
	7.53284	-5.21667
	7.49743	-5.23333
	8.82437	-5.25
	7.6202	-5.26667
	7.101	-5.28333
	5.82818	-5.3
	4.51218	-5.31667
	10.0916	-5.33333
	9.95563	-5.35
	4.98352	-5.36667
	9.93828	-5.38333
	7.74939	-5.4
	5.85229	-5.41667
	3.32869	-5.43333
	4.38717	-5.45
	3.81123	-5.46667
	7.09121	-5.48333
	4.67139	-5.5
	6.21742	-5.51667
	6.61376	-5.53333
	3.83282	-5.55
	4.97643	-5.56667
	5.84227	-5.58333
	4.10065	-5.6
	7.6307	-5.61667
	3.51812	-5.63333
	2.9409	-5.65
	6.94898	-5.66667
	8.63542	-5.68333
	6.06369	-5.7
	8.10427	-5.71667
	5.73634	-5.73333
	7.92534	-5.75
	6.07509	-5.76667
	0.573776	-5.78333
	-0.154749	-5.8
	-0.477343	-5.81667
	1.30198	-5.83333
	3.31093	-5.85
	4.20379	-5.86667
	3.22428	-5.88333
	5.11425	-5.9
	9.12067	-5.91667
	10.4286	-5.93333
	6.1395	-5.95
	3.74778	-5.96667
	8.44245	-5.98333
	6.72312	-6
	3.4999	-6.01667
	3.72805	-6.03333
	1.98771	-6.05
	4.19521	-6.06667
	6.95226	-6.08333
	9.99086	-6.1
	5.16255	-6.11667
	8.70233	-6.13333
	9.88442	-6.15
	2.40381	-6.16667
	8.58185	-6.18333
	7.00913	-6.2
	10.1231	-6.21667
	7.85965	-6.23333
	6.67174	-6.25
	4.52715	-6.26667
	11.0853	-6.28333
	9.69719	-6.3
	4.33409	-6.31667
	3.53561	-6.33333
	6.23012	-6.35
	11.478	-6.36667
	5.02556	-6.38333
	7.67638	-6.4
	8.80869	-6.41667
	3.44327	-6.43333
	5.12709	-6.45
	7.72324	-6.46667
	4.32658	-6.48333
	3.7468	-6.5
	10.8602	-6.51667
	6.39322	-6.53333
	7.41035	-6.55
	5.23836	-6.56667
	10.5082	-6.58333
	9.56468	-6.6
	7.21047	-6.61667
	5.33044	-6.63333
	10.1464	-6.65
	8.82333	-6.66667
	5.47725	-6.68333
	11.0177	-6.7
	5.8038	-6.71667
	7.09589	-6.73333
	6.3889	-6.75
	4.98864	-6.76667
	5.78765	-6.78333
	6.59093	-6.8
	9.48751	-6.81667
	4.32997	-6.83333
	10.4369	-6.85
	6.92707	-6.86667
	5.65893	-6.88333
	3.16236	-6.9
	3.12605	-6.91667
	8.34365	-6.93333
	7.27935	-6.95
	9.39114	-6.96667
	7.33504	-6.98333
	11.8662	-7
	6.85808	-7.01667
	5.59597	-7.03333
	0.667161	-7.05
	0.400952	-7.06667
	-1.93753	-7.08333
	-1.35317	-7.1
	-0.954675	-7.11667
	-1.00577	-7.13333
	-2.35879	-7.15
	-3.32172	-7.16667
	-2.43087	-7.18333
	0.66328	-7.2
	3.7044	-7.21667
	3.67622	-7.23333
	5.60827	-7.25
	1.11458	-7.26667
	2.88346	-7.28333
	6.93316	-7.3
	8.35167	-7.31667
	6.33423	-7.33333
	7.21409	-7.35
	9.10847	-7.36667
	10.1046	-7.38333
	2.99147	-7.4
	4.76015	-7.41667
	3.83959	-7.43333
	7.75028	-7.45
	8.04712	-7.46667
	5.34219	-7.48333
	8.24228	-7.5
	11.3646	-7.51667
	5.19705	-7.53333
	6.72292	-7.55
	4.31677	-7.56667
	10.4076	-7.58333
	12.1226	-7.6
	10.2344	-7.61667
	8.44332	-7.63333
	11.5636	-7.65
	7.16195	-7.66667
	11.8628	-7.68333
	7.34377	-7.7
	3.53562	-7.71667
	5.82692	-7.73333
	1.9936	-7.75
	4.47932	-7.76667
	1.40756	-7.78333
	-3.06389	-7.8
	2.3296	-7.81667
	5.80532	-7.83333
	7.15766	-7.85
	6.62142	-7.86667
	3.10034	-7.88333
	2.93226	-7.9
	5.92753	-7.91667
	10.223	-7.93333
	5.89839	-7.95
	10.4102	-7.96667
	12.5661	-7.98333
	10.0772	-8
	5.65969	-8.01667
	7.72663	-8.03333
	5.47629	-8.05
	3.86078	-8.06667
	1.29014	-8.08333
	5.72122	-8.1
	7.76989	-8.11667
	8.47136	-8.13333
	8.86287	-8.15
	5.21939	-8.16667
	1.84226	-8.18333
	6.2796	-8.2
	6.05616	-8.21667
	7.85653	-8.23333
	4.74564	-8.25
	2.44476	-8.26667
	4.73025	-8.28333
	4.11782	-8.3
	8.1143	-8.31667
	7.04355	-8.33333
	6.38907	-8.35
	2.05605	-8.36667
	5.98095	-8.38333
	7.1421	-8.4
	7.4781	-8.41667
	9.68467	-8.43333
	5.8531	-8.45
	8.09267	-8.46667
	10.8289	-8.48333
	5.62865	-8.5
	3.0529	-8.51667
	2.4913	-8.53333
	7.51044	-8.55
	4.16237	-8.56667
	7.31601	-8.58333
	8.43379	-8.6
	7.33601	-8.61667
	8.38476	-8.63333
	6.88958	-8.65
	3.10721	-8.66667
	3.4311	-8.68333
	6.0946	-8.7
	10.1899	-8.71667
	8.93671	-8.73333
	3.53742	-8.75
	7.51338	-8.76667
	11.1024	-8.78333
	8.76578	-8.8
	2.58083	-8.81667
	6.87075	-8.83333
	5.8255	-8.85
	6.22593	-8.86667
	9.07032	-8.88333
	4.27127	-8.9
	11.2456	-8.91667
	8.8555	-8.93333
	5.18422	-8.95
	6.89567	-8.96667
	8.23361	-8.98333
	8.82579	-9
	3.02064	-9.01667
	6.77045	-9.03333
	10.4576	-9.05
	2.505	-9.06667
	3.88	-9.08333
	8.75518	-9.1
	4.45812	-9.11667
	10.9524	-9.13333
	7.65631	-9.15
	5.32856	-9.16667
	6.87572	-9.18333
	10.7412	-9.2
	8.08354	-9.21667
	4.7626	-9.23333
	7.66969	-9.25
	10.3754	-9.26667
	7.00573	-9.28333
	7.01617	-9.3
	2.99205	-9.31667
	6.56177	-9.33333
	8.27627	-9.35
	4.99067	-9.36667
	6.55928	-9.38333
	2.52863	-9.4
	7.7708	-9.41667
	4.16342	-9.43333
	5.29289	-9.45
	5.65665	-9.46667
	2.64037	-9.48333
	2.26104	-9.5
	4.87702	-9.51667
	5.12293	-9.53333
	5.2497	-9.55
	1.71441	-9.56667
	4.90783	-9.58333
	7.68224	-9.6
	5.56517	-9.61667
	3.01661	-9.63333
	3.63348	-9.65
	3.08585	-9.66667
	4.31453	-9.68333
	5.63796	-9.7
	4.96387	-9.71667
	3.83042	-9.73333
	3.62689	-9.75
	1.45613	-9.76667
	6.56054	-9.78333
	4.56312	-9.8
	4.54103	-9.81667
	4.94145	-9.83333
	3.56622	-9.85
	4.96565	-9.86667
	10.9407	-9.88333
	6.03051	-9.9
	8.43695	-9.91667
	12.1686	-9.93333
	6.52431	-9.95
	9.45481	-9.96667
	4.03251	-9.98333
	5.56444	-10
	8.1986	-10.0167
	10.7683	-10.0333
	8.56169	-10.05
	3.29392	-10.0667
	3.95733	-10.0833
	3.82657	-10.1
	3.85239	-10.1167
	6.19752	-10.1333
	2.68668	-10.15
	1.87265	-10.1667
	5.14845	-10.1833
	12.9513	-10.2
	2.50152	-10.2167
	0.774893	-10.2333
	5.93017	-10.25
	10.3729	-10.2667
	4.83064	-10.2833
	9.00965	-10.3
	4.58419	-10.3167
	5.9539	-10.3333
	12.5887	-10.35
	5.82923	-10.3667
	8.5903	-10.3833
	9.61695	-10.4
	3.89237	-10.4167
	11.0616	-10.4333
	6.69524	-10.45
	8.62823	-10.4667
	6.86025	-10.4833
	4.21595	-10.5
	4.98871	-10.5167
	2.71009	-10.5333
	10.0211	-10.55
	4.42341	-10.5667
	9.95755	-10.5833
	6.56218	-10.6
	7.50678	-10.6167
	7.22443	-10.6333
	6.83692	-10.65
	6.55939	-10.6667
	1.58229	-10.6833
	10.9131	-10.7
	7.82412	-10.7167
	7.70892	-10.7333
	4.48362	-10.75
	7.48764	-10.7667
	6.14981	-10.7833
	7.59783	-10.8
	7.05199	-10.8167
	2.9534	-10.8333
	9.3702	-10.85
	2.91074	-10.8667
	2.84186	-10.8833
	1.8571	-10.9
	1.17292	-10.9167
	3.0797	-10.9333
	2.79708	-10.95
	6.74151	-10.9667
	7.33827	-10.9833
	9.21259	-11
	4.989	-11.0167
	6.67405	-11.0333
	7.51224	-11.05
	8.90884	-11.0667
	9.92936	-11.0833
	3.41617	-11.1
	7.70284	-11.1167
	9.73617	-11.1333
	6.2448	-11.15
	8.29649	-11.1667
	10.6566	-11.1833
	7.56989	-11.2
	4.76728	-11.2167
	5.07151	-11.2333
	9.40067	-11.25
	4.06668	-11.2667
	7.76501	-11.2833
	5.33833	-11.3
	5.41753	-11.3167
	5.96901	-11.3333
	1.03286	-11.35
	3.02497	-11.3667
	6.03441	-11.3833
	7.19422	-11.4
	2.56493	-11.4167
	7.11961	-11.4333
	7.82842	-11.45
	7.92644	-11.4667
	5.6458	-11.4833
	6.98763	-11.5
	9.41657	-11.5167
	6.20338	-11.5333
	5.84266	-11.55
	4.47641	-11.5667
	8.61535	-11.5833
	10.1619	-11.6
	6.20844	-11.6167
	4.80563	-11.6333
	10.6573	-11.65
	8.1384	-11.6667
	6.46375	-11.6833
	7.0546	-11.7
	6.72385	-11.7167
	5.75104	-11.7333
	5.69928	-11.75
	4.95315	-11.7667
	6.44176	-11.7833
	9.05445	-11.8
	8.3384	-11.8167
	3.45205	-11.8333
	0.864194	-11.85
	4.09436	-11.8667
	2.80856	-11.8833
	8.58363	-11.9
	7.61673	-11.9167
	6.92361	-11.9333
	4.85453	-11.95
	4.41234	-11.9667
	7.10566	-11.9833
	4.65324	-12
	4.80476	-12.0167
	3.64443	-12.0333
	3.15585	-12.05
	1.96054	-12.0667
	1.23854	-12.0833
	2.67899	-12.1
	4.96521	-12.1167
	4.57784	-12.1333
	1.36552	-12.15
	7.20409	-12.1667
	7.80154	-12.1833
	2.66347	-12.2
	3.38051	-12.2167
	3.6216	-12.2333
	3.91553	-12.25
	3.72741	-12.2667
	7.79787	-12.2833
	5.28988	-12.3
	6.04918	-12.3167
	7.03069	-12.3333
	6.12075	-12.35
	8.67338	-12.3667
	5.76468	-12.3833
	8.75233	-12.4
	4.48427	-12.4167
	7.90973	-12.4333
	7.04665	-12.45
	3.77678	-12.4667
	10.5936	-12.4833
	6.72116	-12.5
	8.52642	-12.5167
	11.499	-12.5333
	6.40705	-12.55
	5.21698	-12.5667
	6.8781	-12.5833
	10.8528	-12.6
	6.86969	-12.6167
	6.5122	-12.6333
	5.09255	-12.65
	4.74841	-12.6667
	12.2812	-12.6833
	6.707	-12.7
	7.0837	-12.7167
	7.07831	-12.7333
	5.59727	-12.75
	7.86449	-12.7667
	7.66536	-12.7833
	8.5196	-12.8
	5.49636	-12.8167
	7.30721	-12.8333
	7.30012	-12.85
	6.89851	-12.8667
	6.20235	-12.8833
	9.13494	-12.9
	3.84759	-12.9167
	5.62197	-12.9333
	8.88263	-12.95
	5.78202	-12.9667
	9.49709	-12.9833
	0.363594	-13
	0.290101	-13.0167
	7.0505	-13.0333
	9.00369	-13.05
	9.39411	-13.0667
	4.9013	-13.0833
	7.62539	-13.1
	9.10589	-13.1167
	5.39837	-13.1333
	9.52417	-13.15
	5.16059	-13.1667
	8.8729	-13.1833
	8.90294	-13.2
	4.47389	-13.2167
	5.8018	-13.2333
	4.7325	-13.25
	9.6386	-13.2667
	4.25705	-13.2833
	6.8132	-13.3
	4.64937	-13.3167
	1.58683	-13.3333
	5.09501	-13.35
	0.627611	-13.3667
	3.37735	-13.3833
	-0.413662	-13.4
	1.51226	-13.4167
	2.57048	-13.4333
	7.23641	-13.45
	8.03252	-13.4667
	4.81208	-13.4833
	8.88402	-13.5
	7.61606	-13.5167
	4.76557	-13.5333
	6.09896	-13.55
	6.53287	-13.5667
	10.1562	-13.5833
	4.51053	-13.6
	6.31149	-13.6167
	1.23963	-13.6333
	4.91273	-13.65
	4.98326	-13.6667
	3.00452	-13.6833
	2.51327	-13.7
	8.74576	-13.7167
	6.56526	-13.7333
	6.44111	-13.75
	7.97115	-13.7667
	8.63102	-13.7833
	5.83375	-13.8
	8.09879	-13.8167
	7.13996	-13.8333
	9.99528	-13.85
	7.42504	-13.8667
	6.95152	-13.8833
	4.37886	-13.9
	3.91788	-13.9167
	5.67083	-13.9333
	7.29458	-13.95
	6.07321	-13.9667
	10.261	-13.9833
	9.4385	-14
	4.47477	-14.0167
	8.5771	-14.0333
	8.09546	-14.05
	5.69153	-14.0667
	7.48476	-14.0833
	4.08439	-14.1
	8.40505	-14.1167
	7.18612	-14.1333
	6.98079	-14.15
	2.60779	-14.1667
	6.71509	-14.1833
	7.39993	-14.2
	7.27796	-14.2167
	7.50983	-14.2333
	5.64471	-14.25
	7.29931	-14.2667
	4.20677	-14.2833
	8.53091	-14.3
	4.93227	-14.3167
	8.71099	-14.3333
	7.80293	-14.35
	5.73041	-14.3667
	7.47021	-14.3833
	8.33322	-14.4
	6.22078	-14.4167
	9.17141	-14.4333
	6.9757	-14.45
	4.59763	-14.4667
	8.04742	-14.4833
	8.54367	-14.5
	5.39745	-14.5167
	6.94002	-14.5333
	9.28554	-14.55
	4.48369	-14.5667
	8.94336	-14.5833
	4.21425	-14.6
	5.19824	-14.6167
	5.05753	-14.6333
	8.41918	-14.65
	6.96745	-14.6667
	4.55723	-14.6833
	10.5555	-14.7
	8.14031	-14.7167
	7.17	-14.7333
	3.98495	-14.75
	8.24053	-14.7667
	5.86197	-14.7833
	8.60422	-14.8
	7.57867	-14.8167
	2.43614	-14.8333
	10.1717	-14.85
	7.74345	-14.8667
	6.06393	-14.8833
	3.71522	-14.9
	4.48249	-14.9167
	10.0991	-14.9333
	7.6542	-14.95
	3.4125	-14.9667
	5.39843	-14.9833
	7.6397	-15
	3.62265	-15.0167
	6.84879	-15.0333
	8.08261	-15.05
	3.86765	-15.0667
	5.12468	-15.0833
	5.75464	-15.1
	9.23874	-15.1167
	6.44816	-15.1333
	5.66329	-15.15
	9.38969	-15.1667
	8.95114	-15.1833
	7.12608	-15.2
	5.0033	-15.2167
	9.64555	-15.2333
	4.17993	-15.25
	8.07175	-15.2667
	4.37392	-15.2833
	6.77154	-15.3
	9.10401	-15.3167
	8.27972	-15.3333
	3.48502	-15.35
	5.04355	-15.3667
	8.02282	-15.3833
	6.68514	-15.4
	4.71418	-15.4167
	6.70915	-15.4333
	1.07981	-15.45
	9.88354	-15.4667
	6.35429	-15.4833
	3.56403	-15.5
	6.85481	-15.5167
	6.56504	-15.5333
	5.90084	-15.55
	9.26175	-15.5667
	7.95357	-15.5833
	2.97483	-15.6
	10.914	-15.6167
	5.06438	-15.6333
	9.84302	-15.65
	7.79144	-15.6667
	13.7566	-15.6833
	5.95565	-15.7
	8.21645	-15.7167
	11.2951	-15.7333
	5.76283	-15.75
	9.11528	-15.7667
	5.00064	-15.7833
	7.06418	-15.8
	5.3903	-15.8167
	8.98123	-15.8333
	6.92101	-15.85
	3.51321	-15.8667
	9.96636	-15.8833
	7.99267	-15.9
	5.71869	-15.9167
	6.28555	-15.9333
	9.64013	-15.95
	6.89848	-15.9667
	8.0462	-15.9833
	11.3411	-16
	4.26793	-16.0167
	6.39423	-16.0333
	7.89309	-16.05
	8.34227	-16.0667
	4.00423	-16.0833
	7.45132	-16.1
	6.02453	-16.1167
	6.33085	-16.1333
	11.253	-16.15
	2.63393	-16.1667
	9.08114	-16.1833
	5.89254	-16.2
	5.85454	-16.2167
	9.08843	-16.2333
	7.62318	-16.25
	4.10745	-16.2667
	6.10299	-16.2833
	5.57234	-16.3
	7.58066	-16.3167
	8.20097	-16.3333
	7.94458	-16.35
	6.21415	-16.3667
	12.0232	-16.3833
	6.9986	-16.4
	3.01577	-16.4167
	11.5968	-16.4333
	6.95147	-16.45
	9.11508	-16.4667
	5.01657	-16.4833
	8.73408	-16.5
	8.01343	-16.5167
	4.78168	-16.5333
	7.47868	-16.55
	6.58419	-16.5667
	7.81301	-16.5833
	6.06136	-16.6
	4.11785	-16.6167
	4.97134	-16.6333
	6.79435	-16.65
	4.86845	-16.6667
	5.44148	-16.6833
	7.77323	-16.7
	5.39548	-16.7167
	5.38375	-16.7333
	5.90199	-16.75
	7.1163	-16.7667
	5.19363	-16.7833
	7.77313	-16.8
	8.42401	-16.8167
	6.58681	-16.8333
	5.96734	-16.85
	8.05902	-16.8667
	5.82472	-16.8833
	11.4102	-16.9
	8.96855	-16.9167
	6.6693	-16.9333
	4.98713	-16.95
	9.07315	-16.9667
	9.38212	-16.9833
	10.0641	-17
	7.42683	-17.0167
	7.76515	-17.0333
	4.93408	-17.05
	3.05525	-17.0667
	7.68997	-17.0833
	5.29429	-17.1
	8.72043	-17.1167
	7.80484	-17.1333
	3.64862	-17.15
	9.51438	-17.1667
	6.72826	-17.1833
	7.73932	-17.2
	3.91513	-17.2167
	9.04235	-17.2333
	7.77279	-17.25
	7.85636	-17.2667
	7.35862	-17.2833
	6.04937	-17.3
	6.99525	-17.3167
	5.89499	-17.3333
	0.996652	-17.35
	-0.728725	-17.3667
	0.133459	-17.3833
	-0.10658	-17.4
	-0.807371	-17.4167
	0.218087	-17.4333
	0.668818	-17.45
	-0.473176	-17.4667
	4.60859	-17.4833
	4.00792	-17.5
	1.43557	-17.5167
	2.89279	-17.5333
	2.85102	-17.55
	0.438394	-17.5667
	-0.447763	-17.5833
	0.0230595	-17.6
	0.620773	-17.6167
	-0.0746352	-17.6333
	0.06032	-17.65
	-0.0298152	-17.6667
	3.70694	-17.6833
	2.46062	-17.7
	0.89456	-17.7167
	-3.92621	-17.7333
	-2.90932	-17.75
	-2.43162	-17.7667
	7.00902	-17.7833
	11.1184	-17.8
	5.13164	-17.8167
	10.2941	-17.8333
	8.34787	-17.85
	6.33516	-17.8667
	3.78116	-17.8833
	4.89941	-17.9
	9.00261	-17.9167
	6.86286	-17.9333
	4.69765	-17.95
	3.22316	-17.9667
	7.10496	-17.9833
	7.34654	-18
	4.7076	-18.0167
	-0.0523041	-18.0333
	-0.467918	-18.05
	0.120157	-18.0667
	0.328081	-18.0833
	0.860977	-18.1
	0.958752	-18.1167
	4.35106	-18.1333
	3.89527	-18.15
	2.7004	-18.1667
	2.61715	-18.1833
	4.00539	-18.2
	3.77585	-18.2167
	4.50964	-18.2333
	7.46254	-18.25
	5.06171	-18.2667
	1.73346	-18.2833
	2.4123	-18.3
	0.557455	-18.3167
	0.667504	-18.3333
	-0.202925	-18.35
	-0.15237	-18.3667
	-1.04827	-18.3833
	-2.15375	-18.4
	-0.638959	-18.4167
	1.03289	-18.4333
	3.10349	-18.45
	1.34146	-18.4667
	5.36465	-18.4833
	2.24273	-18.5
	5.0971	-18.5167
	5.35091	-18.5333
	4.9496	-18.55
	2.68723	-18.5667
	3.71094	-18.5833
	8.36539	-18.6
	3.61376	-18.6167
	7.50184	-18.6333
	4.43559	-18.65
	1.40806	-18.6667
	1.63251	-18.6833
	2.6404	-18.7
	5.0962	-18.7167
	2.68572	-18.7333
	0.210729	-18.75
	-0.148451	-18.7667
	0.3637	-18.7833
	1.40001	-18.8
	2.60169	-18.8167
	4.15037	-18.8333
	4.67134	-18.85
	1.71752	-18.8667
	2.96345	-18.8833
	2.25056	-18.9
	2.11528	-18.9167
	-0.0606785	-18.9333
	5.10527	-18.95
	4.41257	-18.9667
	3.9573	-18.9833
	5.78282	-19
	3.75847	-19.0167
	4.44505	-19.0333
	7.39457	-19.05
	4.85741	-19.0667
	2.31887	-19.0833
	6.84869	-19.1
	6.03426	-19.1167
	1.08525	-19.1333
	5.48915	-19.15
	7.06406	-19.1667
	2.22116	-19.1833
	3.69401	-19.2
	1.05763	-19.2167
	2.69046	-19.2333
	5.72204	-19.25
	5.29685	-19.2667
	6.22872	-19.2833
	4.50972	-19.3
	5.42726	-19.3167
	4.18046	-19.3333
	5.06787	-19.35
	3.68223	-19.3667
	4.35092	-19.3833
	5.5688	-19.4
	6.27533	-19.4167
	5.83945	-19.4333
	5.37233	-19.45
	7.69378	-19.4667
	6.23281	-19.4833
	2.87405	-19.5
	5.42	-19.5167
	7.10886	-19.5333
	3.17083	-19.55
	6.12493	-19.5667
	9.9089	-19.5833
	4.68247	-19.6
	5.6602	-19.6167
	3.66404	-19.6333
	7.36714	-19.65
	1.40991	-19.6667
	3.96635	-19.6833
	4.11195	-19.7
	1.26132	-19.7167
	1.15509	-19.7333
	4.04778	-19.75
	3.81982	-19.7667
	2.46495	-19.7833
	2.49071	-19.8
	4.00131	-19.8167
	5.92067	-19.8333
	4.84398	-19.85
	3.18213	-19.8667
	4.56108	-19.8833
	2.88101	-19.9
	3.65942	-19.9167
	5.98426	-19.9333
	2.9537	-19.95
	1.66588	-19.9667
	4.03766	-19.9833
	2.03395	-20
	2.37016	-20.0167
	5.35131	-20.0333
	1.99311	-20.05
	3.66425	-20.0667
	4.63739	-20.0833
	5.14356	-20.1
	6.75674	-20.1167
	3.80921	-20.1333
	5.52681	-20.15
	4.37859	-20.1667
	1.63811	-20.1833
	2.32039	-20.2
	3.92838	-20.2167
	0.901173	-20.2333
	2.42212	-20.25
	6.05777	-20.2667
	3.64725	-20.2833
	4.41389	-20.3
	4.16075	-20.3167
	4.23633	-20.3333
	5.22689	-20.35
	6.81045	-20.3667
	4.31628	-20.3833
	5.94995	-20.4
	4.55226	-20.4167
	6.81695	-20.4333
	2.28905	-20.45
	0.0752631	-20.4667
	-0.0878185	-20.4833
	0.187093	-20.5
	0.259268	-20.5167
	-0.484604	-20.5333
	0.9993	-20.55
	5.24371	-20.5667
	7.08558	-20.5833
	3.0795	-20.6
	7.31029	-20.6167
	5.8594	-20.6333
	6.95714	-20.65
	8.34363	-20.6667
	4.1907	-20.6833
	7.10387	-20.7
	4.45437	-20.7167
	0.542699	-20.7333
	4.85487	-20.75
	5.63803	-20.7667
	4.61161	-20.7833
	1.27122	-20.8
	6.57243	-20.8167
	6.79662	-20.8333
	4.1539	-20.85
	6.03966	-20.8667
	4.20013	-20.8833
	3.83978	-20.9
	8.83223	-20.9167
	6.54865	-20.9333
	4.60359	-20.95
	7.15515	-20.9667
	5.96391	-20.9833
	7.38556	-21
	6.21113	-21.0167
	9.3339	-21.0333
	5.04066	-21.05
	7.88992	-21.0667
	6.38232	-21.0833
	7.92964	-21.1
	3.93924	-21.1167
	6.37676	-21.1333
	4.58	-21.15
	11.0392	-21.1667
	8.38953	-21.1833
	9.33185	-21.2
	5.56011	-21.2167
	6.62397	-21.2333
	7.17057	-21.25
	5.69096	-21.2667
	9.59667	-21.2833
	10.8566	-21.3
	6.48403	-21.3167
	7.65223	-21.3333
	6.25798	-21.35
	8.01521	-21.3667
	5.17779	-21.3833
	6.38299	-21.4
	10.9596	-21.4167
	6.51462	-21.4333
	3.48006	-21.45
	4.50633	-21.4667
	1.73962	-21.4833
	9.52996	-21.5
	6.89046	-21.5167
	6.06037	-21.5333
	5.00356	-21.55
	5.52397	-21.5667
	6.98018	-21.5833
	5.18853	-21.6
	5.71675	-21.6167
	5.77919	-21.6333
	1.63769	-21.65
	4.22435	-21.6667
	6.44311	-21.6833
	5.56657	-21.7
	6.88225	-21.7167
	4.78919	-21.7333
	7.1516	-21.75
	8.34616	-21.7667
	8.69145	-21.7833
	4.54114	-21.8
	5.85137	-21.8167
	7.41672	-21.8333
	2.77404	-21.85
	5.27005	-21.8667
	6.97949	-21.8833
	4.56822	-21.9
	3.79492	-21.9167
	3.64802	-21.9333
	4.67275	-21.95
	7.01247	-21.9667
	8.05225	-21.9833
	5.31603	-22
	9.82948	-22.0167
	1.53555	-22.0333
	1.13551	-22.05
	6.61534	-22.0667
	4.67727	-22.0833
	8.77621	-22.1
	7.96247	-22.1167
	7.17758	-22.1333
	4.03108	-22.15
	3.05015	-22.1667
	3.64441	-22.1833
	12.0272	-22.2
	10.681	-22.2167
	4.87854	-22.2333
	5.50631	-22.25
	6.69599	-22.2667
	8.17724	-22.2833
	6.49484	-22.3
	3.96482	-22.3167
	5.52976	-22.3333
	8.66751	-22.35
	5.84557	-22.3667
	5.70862	-22.3833
	6.55323	-22.4
	4.70696	-22.4167
	9.69692	-22.4333
	8.70613	-22.45
	5.97365	-22.4667
	7.70806	-22.4833
	5.79678	-22.5
	3.31025	-22.5167
	0.922069	-22.5333
	3.85695	-22.55
	6.61564	-22.5667
	3.98795	-22.5833
	5.25338	-22.6
	4.32176	-22.6167
	4.49052	-22.6333
	5.99473	-22.65
	5.22661	-22.6667
	6.99165	-22.6833
	8.05909	-22.7
	5.86066	-22.7167
	4.81125	-22.7333
	6.06655	-22.75
	4.75131	-22.7667
	4.56125	-22.7833
	8.0474	-22.8
	6.7393	-22.8167
	4.31577	-22.8333
	5.20128	-22.85
	5.93613	-22.8667
	5.29404	-22.8833
	5.03115	-22.9
	5.5851	-22.9167
	1.23905	-22.9333
	2.47429	-22.95
	3.58885	-22.9667
	2.59089	-22.9833
	8.42066	-23
	8.20385	-23.0167
	1.7981	-23.0333
	5.85961	-23.05
	4.06103	-23.0667
	3.50999	-23.0833
	7.16523	-23.1
	6.34054	-23.1167
	5.84699	-23.1333
	4.36366	-23.15
	7.33607	-23.1667
	4.1481	-23.1833
	10.2549	-23.2
	7.8867	-23.2167
	11.4022	-23.2333
	5.89782	-23.25
	9.25453	-23.2667
	6.4526	-23.2833
	13.2133	-23.3
	6.65605	-23.3167
	5.38786	-23.3333
	0.030608	-23.35
	4.95427	-23.3667
	10.5332	-23.3833
	5.44542	-23.4
	9.41504	-23.4167
	7.342	-23.4333
	3.52168	-23.45
	3.57796	-23.4667
	7.34797	-23.4833
	2.84315	-23.5
	5.90024	-23.5167
	5.16444	-23.5333
	9.54903	-23.55
	10.9814	-23.5667
	4.93751	-23.5833
	5.45671	-23.6
	7.63043	-23.6167
	6.73819	-23.6333
	3.48866	-23.65
	6.20194	-23.6667
	4.48419	-23.6833
	6.84203	-23.7
	1.95997	-23.7167
	3.01187	-23.7333
	7.95583	-23.75
	2.48213	-23.7667
	3.74913	-23.7833
	2.63677	-23.8
	4.68113	-23.8167
	3.06577	-23.8333
	3.26443	-23.85
	5.59556	-23.8667
	3.71238	-23.8833
	2.50241	-23.9
	2.59679	-23.9167
	7.16064	-23.9333
	7.74007	-23.95
	5.22094	-23.9667
	8.09493	-23.9833
	3.64811	-24
	8.05924	-24.0167
	9.39729	-24.0333
	5.49083	-24.05
	5.82414	-24.0667
	1.3341	-24.0833
	1.97822	-24.1
	2.47033	-24.1167
	5.87881	-24.1333
	4.94074	-24.15
	4.05875	-24.1667
	5.97273	-24.1833
	3.33478	-24.2
	5.57175	-24.2167
	9.51578	-24.2333
	6.43569	-24.25
	2.51848	-24.2667
	3.8289	-24.2833
	1.59874	-24.3
	4.25205	-24.3167
	6.09913	-24.3333
	3.11164	-24.35
	-0.055832	-24.3667
	4.98774	-24.3833
	4.44574	-24.4
	1.13052	-24.4167
	0.212808	-24.4333
	0.386215	-24.45
	0.043343	-24.4667
	0.146572	-24.4833
	3.2417	-24.5
	2.97416	-24.5167
	5.24738	-24.5333
	9.1467	-24.55
	5.60439	-24.5667
	9.78058	-24.5833
	6.37207	-24.6
	8.34043	-24.6167
	4.39671	-24.6333
	2.71847	-24.65
	9.00076	-24.6667
	4.60976	-24.6833
	5.68539	-24.7
	6.52776	-24.7167
	3.61171	-24.7333
	6.26181	-24.75
	6.03657	-24.7667
	10.5121	-24.7833
	4.91323	-24.8
	7.79398	-24.8167
	5.91155	-24.8333
	0.242962	-24.85
	9.68839	-24.8667
	9.17879	-24.8833
	8.60311	-24.9
	4.2914	-24.9167
	8.5727	-24.9333
	3.97229	-24.95
	8.29003	-24.9667
	6.60288	-24.9833
	2.90044	-25
	8.91358	-25.0167
	7.15902	-25.0333
	8.25765	-25.05
	3.62718	-25.0667
	9.77743	-25.0833
	5.59293	-25.1
	2.84623	-25.1167
	5.89036	-25.1333
	6.52982	-25.15
	4.76707	-25.1667
	4.46734	-25.1833
	0.534468	-25.2
	8.45657	-25.2167
	8.19545	-25.2333
	3.29571	-25.25
	7.61501	-25.2667
	5.45504	-25.2833
	5.00313	-25.3
	9.7522	-25.3167
	7.26653	-25.3333
	6.94524	-25.35
	8.35066	-25.3667
	6.07126	-25.3833
	3.17278	-25.4
	4.35876	-25.4167
	5.11604	-25.4333
	3.04064	-25.45
	3.91832	-25.4667
	7.80544	-25.4833
	2.18227	-25.5
	5.3029	-25.5167
	3.95733	-25.5333
	5.38762	-25.55
	8.05948	-25.5667
	4.5775	-25.5833
	2.84616	-25.6
	3.67006	-25.6167
	5.23746	-25.6333
	3.75524	-25.65
	4.23434	-25.6667
	5.96241	-25.6833
	5.54518	-25.7
	3.53727	-25.7167
	5.8918	-25.7333
	3.08916	-25.75
	6.10212	-25.7667
	7.53916	-25.7833
	3.46689	-25.8
	4.96698	-25.8167
	9.01026	-25.8333
	3.24851	-25.85
	8.88237	-25.8667
	7.12658	-25.8833
	3.48585	-25.9
	9.59522	-25.9167
	7.76423	-25.9333
	7.07414	-25.95
	5.45903	-25.9667
	7.72709	-25.9833
	1.1925	-26
	0.99539	-26.0167
	6.42743	-26.0333
	4.13369	-26.05
	4.52393	-26.0667
	6.28702	-26.0833
	9.02947	-26.1
	6.50987	-26.1167
	3.67162	-26.1333
	6.56474	-26.15
	2.88692	-26.1667
	9.40342	-26.1833
	2.80625	-26.2
	3.73779	-26.2167
	6.96191	-26.2333
	3.25557	-26.25
	1.24902	-26.2667
	2.83982	-26.2833
	7.16582	-26.3
	1.58018	-26.3167
	0.956717	-26.3333
	3.16503	-26.35
	6.7763	-26.3667
	2.97055	-26.3833
	3.72748	-26.4
	1.68895	-26.4167
	2.1566	-26.4333
	5.39493	-26.45
	3.805	-26.4667
	4.38329	-26.4833
	6.43281	-26.5
	4.87458	-26.5167
	4.33366	-26.5333
	6.69874	-26.55
	5.71002	-26.5667
	6.93016	-26.5833
	6.56864	-26.6
	6.31347	-26.6167
	6.48202	-26.6333
	3.95304	-26.65
	2.83765	-26.6667
	5.73587	-26.6833
	4.55845	-26.7
	3.89792	-26.7167
	0.937515	-26.7333
	3.18421	-26.75
	6.6484	-26.7667
	3.45094	-26.7833
	3.03994	-26.8
	2.61518	-26.8167
	3.55953	-26.8333
	5.12632	-26.85
	7.11016	-26.8667
	5.33726	-26.8833
	4.867	-26.9
	6.02138	-26.9167
	3.82649	-26.9333
	5.97812	-26.95
	7.63772	-26.9667
	8.13632	-26.9833
	4.84575	-27
	6.3354	-27.0167
	8.8099	-27.0333
	4.62833	-27.05
	4.9225	-27.0667
	6.76443	-27.0833
	4.68711	-27.1
	3.04534	-27.1167
	8.70056	-27.1333
	9.51348	-27.15
	4.30681	-27.1667
	5.95326	-27.1833
	6.21672	-27.2
	5.46678	-27.2167
	5.91274	-27.2333
	2.89025	-27.25
	4.32799	-27.2667
	7.16023	-27.2833
	8.31101	-27.3
	4.05187	-27.3167
	6.7146	-27.3333
	7.13904	-27.35
	12.0123	-27.3667
	5.38855	-27.3833
	9.81411	-27.4
	7.10016	-27.4167
	7.77619	-27.4333
	9.44028	-27.45
	5.90176	-27.4667
	12.5919	-27.4833
	7.3639	-27.5
	7.24557	-27.5167
	4.7767	-27.5333
	7.0701	-27.55
	10.9416	-27.5667
	4.6276	-27.5833
	9.69842	-27.6
	11.533	-27.6167
	6.35656	-27.6333
	7.18569	-27.65
	3.33256	-27.6667
	7.87035	-27.6833
	7.60473	-27.7
	6.58567	-27.7167
	4.54763	-27.7333
	5.063	-27.75
	7.00543	-27.7667
	2.62602	-27.7833
	4.11732	-27.8
	2.43587	-27.8167
	2.94594	-27.8333
	3.21636	-27.85
	1.49316	-27.8667
	2.268	-27.8833
	3.27635	-27.9
	2.74019	-27.9167
	3.35078	-27.9333
	6.05394	-27.95
	8.41334	-27.9667
	5.36757	-27.9833
	3.98044	-28
	9.23128	-28.0167
	5.28159	-28.0333
	4.34437	-28.05
	4.16009	-28.0667
	3.21298	-28.0833
	1.59527	-28.1
	0.304704	-28.1167
	1.51207	-28.1333
	3.25874	-28.15
	4.04294	-28.1667
	3.49385	-28.1833
	6.05904	-28.2
	3.91896	-28.2167
	6.65481	-28.2333
	3.43953	-28.25
	7.16771	-28.2667
	6.12523	-28.2833
	5.77072	-28.3
	6.39053	-28.3167
	3.85625	-28.3333
	5.70984	-28.35
	6.94757	-28.3667
	6.61777	-28.3833
	3.58283	-28.4
	6.36923	-28.4167
	4.45252	-28.4333
	6.67721	-28.45
	3.92315	-28.4667
	7.88332	-28.4833
	8.02742	-28.5
	5.51676	-28.5167
	2.66168	-28.5333
	2.29224	-28.55
	2.83835	-28.5667
	8.86918	-28.5833
	7.02027	-28.6
	8.51702	-28.6167
	8.59244	-28.6333
	6.30449	-28.65
	8.73327	-28.6667
	9.43729	-28.6833
	9.68594	-28.7
	3.83313	-28.7167
	7.12647	-28.7333
	5.60015	-28.75
	4.16597	-28.7667
	4.66003	-28.7833
	6.16839	-28.8
	5.80355	-28.8167
	5.33805	-28.8333
	5.39373	-28.85
	6.08781	-28.8667
	5.57166	-28.8833
	6.80127	-28.9
	3.63128	-28.9167
	11.1515	-28.9333
	7.86207	-28.95
	4.48735	-28.9667
	8.51798	-28.9833
	6.71995	-29
	5.85101	-29.0167
	7.4336	-29.0333
	3.33387	-29.05
	4.44047	-29.0667
	8.08799	-29.0833
	1.35298	-29.1
	0.788923	-29.1167
	2.70274	-29.1333
	4.88249	-29.15
	7.00159	-29.1667
	4.56426	-29.1833
	8.11552	-29.2
	6.65153	-29.2167
	7.16511	-29.2333
	5.10572	-29.25
	6.81894	-29.2667
	7.41949	-29.2833
	7.86852	-29.3
	2.6797	-29.3167
	0.55772	-29.3333
	6.71686	-29.35
	7.86828	-29.3667
	5.55997	-29.3833
	7.96404	-29.4
	4.90557	-29.4167
	5.08579	-29.4333
	7.83875	-29.45
	6.58511	-29.4667
	6.91176	-29.4833
	5.01635	-29.5
	3.45667	-29.5167
	6.59885	-29.5333
	4.21637	-29.55
	8.47969	-29.5667
	6.08896	-29.5833
	5.40651	-29.6
	10.2235	-29.6167
	6.28321	-29.6333
	5.00446	-29.65
	6.93418	-29.6667
	4.95896	-29.6833
	6.81316	-29.7
	4.93988	-29.7167
	6.6928	-29.7333
	7.0546	-29.75
	7.27609	-29.7667
	4.46773	-29.7833
	1.5705	-29.8
	7.7657	-29.8167
	6.11142	-29.8333
	9.00406	-29.85
	5.82925	-29.8667
	5.96741	-29.8833
	7.18816	-29.9
	3.23011	-29.9167
	4.31202	-29.9333
	8.73289	-29.95
	2.63658	-29.9667
	4.90118	-29.9833
	3.5552	-30
	6.03691	-30.0167
	4.50248	-30.0333
	7.54309	-30.05
	2.87856	-30.0667
	2.70247	-30.0833
	3.48502	-30.1
	3.36192	-30.1167
	6.53137	-30.1333
	8.37206	-30.15
	6.45544	-30.1667
	4.10501	-30.1833
	6.15297	-30.2
	5.91081	-30.2167
	5.64219	-30.2333
	10.004	-30.25
	7.97001	-30.2667
	6.19689	-30.2833
	9.84875	-30.3
	3.21348	-30.3167
	9.1951	-30.3333
	7.04394	-30.35
	5.86889	-30.3667
	12.2365	-30.3833
	9.58461	-30.4
	5.89354	-30.4167
	9.37111	-30.4333
	5.14644	-30.45
	5.47358	-30.4667
	3.63121	-30.4833
	1.43076	-30.5
	3.31905	-30.5167
	6.03309	-30.5333
	5.07814	-30.55
	7.91284	-30.5667
	4.89933	-30.5833
	8.36033	-30.6
	6.35257	-30.6167
	2.77349	-30.6333
	5.75843	-30.65
	4.49138	-30.6667
	0.649293	-30.6833
	0.346551	-30.7
	3.98482	-30.7167
	4.52914	-30.7333
	8.21184	-30.75
	6.27816	-30.7667
	4.77656	-30.7833
	4.4838	-30.8
	4.71518	-30.8167
	2.98698	-30.8333
	7.77085	-30.85
	7.74817	-30.8667
	5.59929	-30.8833
	6.22832	-30.9
	9.30119	-30.9167
	4.54808	-30.9333
	7.44953	-30.95
	7.0734	-30.9667
	10.7175	-30.9833
	5.13688	-31
	8.65314	-31.0167
	6.97924	-31.0333
	2.8801	-31.05
	11.1131	-31.0667
	7.96283	-31.0833
	6.64871	-31.1
	3.84938	-31.1167
	8.59448	-31.1333
	6.4147	-31.15
	7.14265	-31.1667
	7.22983	-31.1833
	7.33237	-31.2
	8.41346	-31.2167
	9.69317	-31.2333
	9.18341	-31.25
	4.63169	-31.2667
	8.00126	-31.2833
	6.48902	-31.3
	6.9259	-31.3167
	9.6492	-31.3333
	9.21591	-31.35
	6.57228	-31.3667
	6.13313	-31.3833
	9.31268	-31.4
	9.61584	-31.4167
	4.66339	-31.4333
	5.07506	-31.45
	6.72511	-31.4667
	8.0903	-31.4833
	8.20875	-31.5
	4.93588	-31.5167
	6.95185	-31.5333
	7.98444	-31.55
	8.23569	-31.5667
	4.94259	-31.5833
	10.6416	-31.6
	3.93633	-31.6167
	6.60367	-31.6333
	7.22343	-31.65
	4.589	-31.6667
	6.61736	-31.6833
	6.11984	-31.7
	1.60714	-31.7167
	3.94521	-31.7333
	4.31944	-31.75
	5.28718	-31.7667
	6.22771	-31.7833
	9.0301	-31.8
	8.88392	-31.8167
	4.17332	-31.8333
	4.71681	-31.85
	0.166213	-31.8667
	6.24824	-31.8833
	5.68169	-31.9
	6.98818	-31.9167
	4.61505	-31.9333
	10.061	-31.95
	4.88429	-31.9667
	4.46371	-31.9833
	1.88015	-32
	7.42254	-32.0167
	4.78751	-32.0333
	2.08257	-32.05
	6.4819	-32.0667
	0.941112	-32.0833
	1.98499	-32.1
	3.68026	-32.1167
	2.00751	-32.1333
	6.64589	-32.15
	5.29712	-32.1667
	8.45459	-32.1833
	3.6172	-32.2
	8.10948	-32.2167
	7.84667	-32.2333
	6.65024	-32.25
	6.48388	-32.2667
	5.62919	-32.2833
	4.15261	-32.3
	6.27944	-32.3167
	0.713733	-32.3333
	1.45576	-32.35
	0.894194	-32.3667
	5.36917	-32.3833
	3.79511	-32.4
	9.15335	-32.4167
	7.16565	-32.4333
	9.85302	-32.45
	4.11595	-32.4667
	7.66722	-32.4833
	6.14997	-32.5
	3.28143	-32.5167
	6.63741	-32.5333
	7.94115	-32.55
	8.05361	-32.5667
	6.9139	-32.5833
	7.9704	-32.6
	8.53774	-32.6167
	6.22108	-32.6333
	6.26423	-32.65
	5.83296	-32.6667
	4.65312	-32.6833
	6.58952	-32.7
	7.52297	-32.7167
	6.82872	-32.7333
	11.7189	-32.75
	7.40653	-32.7667
	4.62143	-32.7833
	8.76893	-32.8
	10.2051	-32.8167
	8.35235	-32.8333
	7.50202	-32.85
	9.28931	-32.8667
	6.30248	-32.8833
	4.27244	-32.9
	4.56961	-32.9167
	4.38452	-32.9333
	7.6928	-32.95
	7.68402	-32.9667
	6.08128	-32.9833
	7.17493	-33
	7.13943	-33.0167
	10.3102	-33.0333
	3.17456	-33.05
	9.48287	-33.0667
	7.7384	-33.0833
	6.08693	-33.1
	5.43216	-33.1167
	8.97543	-33.1333
	6.81803	-33.15
	4.46569	-33.1667
	8.61671	-33.1833
	4.30159	-33.2
	7.02671	-33.2167
	7.1196	-33.2333
	9.87482	-33.25
	4.36653	-33.2667
	8.38435	-33.2833
	5.64465	-33.3
[truncated: 48,981 more rows]

## Sheet: Fig 2 (B)_single cell
	Response to 2Dg
	Hz	Time (seconds)
	6.48408	-0.0166667
	8.37195	-0.0333333
	5.79226	-0.05
	3.46769	-0.0666667
	0.86525	-0.0833333
	0.798798	-0.1
	10.7661	-0.116667
	7.91556	-0.133333
	5.80303	-0.15
	2.91977	-0.166667
	5.60627	-0.183333
	9.69385	-0.2
	5.62314	-0.216667
	6.74144	-0.233333
	3.57071	-0.25
	1.22149	-0.266667
	1.54141	-0.283333
	1.50689	-0.3
	7.89504	-0.316667
	3.8791	-0.333333
	8.14617	-0.35
	5.61735	-0.366667
	2.68321	-0.383333
	4.94887	-0.4
	4.88901	-0.416667
	4.17435	-0.433333
	8.01607	-0.45
	2.89787	-0.466667
	1.53415	-0.483333
	3.39497	-0.5
	8.67351	-0.516667
	6.39942	-0.533333
	7.27472	-0.55
	5.19261	-0.566667
	3.00468	-0.583333
	7.23119	-0.6
	2.91466	-0.616667
	3.08453	-0.633333
	6.55932	-0.65
	4.39619	-0.666667
	7.73411	-0.683333
	10.7928	-0.7
	7.08415	-0.716667
	5.72086	-0.733333
	2.60284	-0.75
	13.6676	-0.766667
	9.81755	-0.783333
	2.93638	-0.8
	2.07122	-0.816667
	1.33574	-0.833333
	0.940167	-0.85
	2.6902	-0.866667
	6.50461	-0.883333
	3.59515	-0.9
	4.25575	-0.916667
	8.76861	-0.933333
	3.43662	-0.95
	9.33884	-0.966667
	2.48848	-0.983333
	5.18945	-1
	6.14741	-1.01667
	3.53359	-1.03333
	1.32852	-1.05
	1.07917	-1.06667
	2.99065	-1.08333
	1.62437	-1.1
	2.46167	-1.11667
	2.49631	-1.13333
	3.46179	-1.15
	3.15242	-1.16667
	8.09534	-1.18333
	4.36196	-1.2
	6.66705	-1.21667
	8.94617	-1.23333
	5.82436	-1.25
	6.95958	-1.26667
	5.49017	-1.28333
	10.0539	-1.3
	3.6123	-1.31667
	8.07054	-1.33333
	4.18526	-1.35
	3.28363	-1.36667
	7.447	-1.38333
	2.60376	-1.4
	5.43758	-1.41667
	8.39455	-1.43333
	0.733706	-1.45
	1.34372	-1.46667
	0.737388	-1.48333
	1.65092	-1.5
	2.30023	-1.51667
	2.14143	-1.53333
	6.02849	-1.55
	0.919107	-1.56667
	-0.429682	-1.58333
	0.403351	-1.6
	-1.46995	-1.61667
	-8.12841	-1.63333
	-3.56646	-1.65
	-6.76621	-1.66667
	-7.85065	-1.68333
	-2.32136	-1.7
	-1.58596	-1.71667
	-4.20133	-1.73333
	2.48509	-1.75
	8.73838	-1.76667
	5.89026	-1.78333
	5.3011	-1.8
	2.19474	-1.81667
	2.23976	-1.83333
	-0.941894	-1.85
	-1.57633	-1.86667
	-5.70588	-1.88333
	-9.41001	-1.9
	-2.35915	-1.91667
	-3.06372	-1.93333
	-10.1202	-1.95
	-6.87253	-1.96667
	-6.57447	-1.98333
	8.87063	-2
	9.5311	-2.01667
	7.7744	-2.03333
	1.60718	-2.05
	6.4151	-2.06667
	5.98463	-2.08333
	1.16561	-2.1
	2.62732	-2.11667
	0.804002	-2.13333
	5.9663	-2.15
	9.34416	-2.16667
	9.4047	-2.18333
	5.34858	-2.2
	5.22336	-2.21667
	7.56268	-2.23333
	3.7594	-2.25
	8.41882	-2.26667
	2.11819	-2.28333
	2.49244	-2.3
	2.79108	-2.31667
	2.50814	-2.33333
	5.74135	-2.35
	8.65466	-2.36667
	9.216	-2.38333
	5.89829	-2.4
	9.41257	-2.41667
	9.57753	-2.43333
	4.35465	-2.45
	1.68183	-2.46667
	1.31718	-2.48333
	7.24755	-2.5
	4.7291	-2.51667
	5.27842	-2.53333
	8.73848	-2.55
	4.95234	-2.56667
	7.90907	-2.58333
	3.68817	-2.6
	2.9374	-2.61667
	7.63795	-2.63333
	2.18549	-2.65
	1.03909	-2.66667
	-0.472329	-2.68333
	-1.1803	-2.7
	-1.74129	-2.71667
	-5.64348	-2.73333
	-6.71917	-2.75
	-6.45686	-2.76667
	-4.79871	-2.78333
	-7.40388	-2.8
	-9.81973	-2.81667
	-1.78997	-2.83333
	-2.5213	-2.85
	-7.98963	-2.86667
	-7.46068	-2.88333
	-9.62244	-2.9
	-2.28379	-2.91667
	-8.28497	-2.93333
	-7.59255	-2.95
	-9.82832	-2.96667
	-2.49119	-2.98333
	-3.23397	-3
	0.121726	-3.01667
	0.723712	-3.03333
	1.03661	-3.05
	2.00619	-3.06667
	2.09941	-3.08333
	4.92326	-3.1
	0.934109	-3.11667
	-2.70291	-3.13333
	-1.37928	-3.15
	2.21743	-3.16667
	2.16114	-3.18333
	-3.76244	-3.2
	1.21375	-3.21667
	1.85162	-3.23333
	-5.02871	-3.25
	0.564149	-3.26667
	1.17716	-3.28333
	4.09676	-3.3
	-0.0903087	-3.31667
	-2.17859	-3.33333
	-2.02313	-3.35
	4.38374	-3.36667
	0.795943	-3.38333
	0.714982	-3.4
	2.78205	-3.41667
	6.83129	-3.43333
	8.52763	-3.45
	6.30234	-3.46667
	5.23558	-3.48333
	3.33404	-3.5
	1.48934	-3.51667
	1.1653	-3.53333
	1.2193	-3.55
	7.60837	-3.56667
	4.90377	-3.58333
	6.98146	-3.6
	5.68266	-3.61667
	5.54679	-3.63333
	10.3519	-3.65
	2.83355	-3.66667
	8.86075	-3.68333
	4.35238	-3.7
	1.5268	-3.71667
	1.7131	-3.73333
	7.58067	-3.75
	6.59514	-3.76667
	9.23421	-3.78333
	3.68543	-3.8
	5.12257	-3.81667
	8.82466	-3.83333
	8.25849	-3.85
	5.10187	-3.86667
	2.76138	-3.88333
	1.19372	-3.9
	1.83746	-3.91667
	1.28369	-3.93333
	7.62848	-3.95
	5.95482	-3.96667
	7.47984	-3.98333
	2.74701	-4
	2.02472	-4.01667
	2.75667	-4.03333
	9.12097	-4.05
	3.11167	-4.06667
	5.98181	-4.08333
	5.33049	-4.1
	3.14428	-4.11667
	1.99411	-4.13333
	2.34503	-4.15
	7.76433	-4.16667
	7.39107	-4.18333
	7.51646	-4.2
	5.54749	-4.21667
	6.83064	-4.23333
	7.53428	-4.25
	5.44354	-4.26667
	4.73817	-4.28333
	2.22992	-4.3
	1.94936	-4.31667
	1.63757	-4.33333
	8.31957	-4.35
	1.91837	-4.36667
	1.07429	-4.38333
	0.438135	-4.4
	6.26075	-4.41667
	6.30672	-4.43333
	3.9919	-4.45
	2.24973	-4.46667
	9.10647	-4.48333
	1.729	-4.5
	0.289567	-4.51667
	0.34103	-4.53333
	-0.0612586	-4.55
	-0.171956	-4.56667
	0.849161	-4.58333
	1.08004	-4.6
	4.17869	-4.61667
	2.0336	-4.63333
	0.781207	-4.65
	1.73616	-4.66667
	2.61668	-4.68333
	2.22042	-4.7
	0.803883	-4.71667
	1.9504	-4.73333
	6.95633	-4.75
	6.58231	-4.76667
	8.12468	-4.78333
	3.53463	-4.8
	3.79736	-4.81667
	7.19432	-4.83333
	5.19659	-4.85
	-2.24921	-4.86667
	1.83049	-4.88333
	-0.395108	-4.9
	1.2565	-4.91667
	0.959418	-4.93333
	0.398147	-4.95
	0.25356	-4.96667
	0.846846	-4.98333
	0.0679729	-5
	-0.0324547	-5.01667
	0.488014	-5.03333
	-0.155592	-5.05
	0.393635	-5.06667
	0.543349	-5.08333
	-0.177327	-5.1
	-0.563554	-5.11667
	1.03875	-5.13333
	2.05455	-5.15
	4.74264	-5.16667
	3.01457	-5.18333
	0.923494	-5.2
	1.80856	-5.21667
	1.42043	-5.23333
	3.71334	-5.25
	5.61664	-5.26667
	0.166104	-5.28333
	-5.97501	-5.3
	-5.45289	-5.31667
	-4.30593	-5.33333
	-6.08954	-5.35
	-5.19918	-5.36667
	-0.427381	-5.38333
	-0.692874	-5.4
	0.0965813	-5.41667
	0.233434	-5.43333
	-0.154767	-5.45
	0.685423	-5.46667
	0.0534038	-5.48333
	1.73597	-5.5
	10.0504	-5.51667
	8.49187	-5.53333
	8.24958	-5.55
	5.92348	-5.56667
	6.814	-5.58333
	3.60079	-5.6
	6.20649	-5.61667
	9.65795	-5.63333
	10.1798	-5.65
	2.80304	-5.66667
	2.33316	-5.68333
	4.17718	-5.7
	5.82812	-5.71667
	2.91412	-5.73333
	2.10266	-5.75
	1.05402	-5.76667
	6.91285	-5.78333
	3.06429	-5.8
	-5.74963	-5.81667
	-2.08522	-5.83333
	-0.554706	-5.85
	0.159862	-5.86667
	-5.26427	-5.88333
	-10.9054	-5.9
	-3.40757	-5.91667
	-8.86178	-5.93333
	-6.52708	-5.95
	-3.02566	-5.96667
	-9.8744	-5.98333
	-6.2667	-6
	-8.17379	-6.01667
	-2.70944	-6.03333
	-4.24442	-6.05
	-5.36822	-6.06667
	-6.82562	-6.08333
	-8.97689	-6.1
	-4.73091	-6.11667
	-5.927	-6.13333
	-8.249	-6.15
	-11.3281	-6.16667
	-3.80174	-6.18333
	2.50649	-6.2
	4.80949	-6.21667
	2.53636	-6.23333
	1.67208	-6.25
	0.273615	-6.26667
	1.37745	-6.28333
	3.94809	-6.3
	-1.24267	-6.31667
	2.30285	-6.33333
	11.0973	-6.35
	7.86679	-6.36667
	4.13972	-6.38333
	1.98832	-6.4
	2.43591	-6.41667
	2.72007	-6.43333
	2.28893	-6.45
	3.22555	-6.46667
	6.43974	-6.48333
	9.68324	-6.5
	5.79581	-6.51667
	2.60404	-6.53333
	10.4097	-6.55
	4.61524	-6.56667
	9.11657	-6.58333
	1.30538	-6.6
	1.9494	-6.61667
	4.1457	-6.63333
	10.0311	-6.65
	4.20082	-6.66667
	8.82284	-6.68333
	5.18467	-6.7
	6.9517	-6.71667
	7.38608	-6.73333
	9.83393	-6.75
	3.32282	-6.76667
	0.351023	-6.78333
	3.72852	-6.8
	9.3638	-6.81667
	4.90183	-6.83333
	5.99121	-6.85
	4.44396	-6.86667
	2.97229	-6.88333
	5.07957	-6.9
	6.01652	-6.91667
	8.20049	-6.93333
	4.96269	-6.95
	1.88863	-6.96667
	2.10397	-6.98333
	2.22415	-7
	2.38797	-7.01667
	8.23103	-7.03333
	2.6133	-7.05
	5.24643	-7.06667
	6.21065	-7.08333
	3.59525	-7.1
	2.44883	-7.11667
	9.06763	-7.13333
	4.82231	-7.15
	8.35556	-7.16667
	4.05699	-7.18333
	0.879781	-7.2
	1.01013	-7.21667
	2.04123	-7.23333
	8.38218	-7.25
	4.02454	-7.26667
	5.28373	-7.28333
	7.00164	-7.3
	3.14526	-7.31667
	4.93502	-7.33333
	8.22617	-7.35
	7.11069	-7.36667
	4.46491	-7.38333
	2.27588	-7.4
	1.05542	-7.41667
	1.81184	-7.43333
	2.59439	-7.45
	4.35484	-7.46667
	6.5796	-7.48333
	4.61026	-7.5
	6.80518	-7.51667
	1.43788	-7.53333
	1.86929	-7.55
	3.35744	-7.56667
	2.26788	-7.58333
	5.07909	-7.6
	3.98949	-7.61667
	3.04081	-7.63333
	6.33007	-7.65
	2.77073	-7.66667
	1.64275	-7.68333
	1.29336	-7.7
	1.22903	-7.71667
	0.884673	-7.73333
	4.59707	-7.75
	7.6855	-7.76667
	1.66843	-7.78333
	4.7592	-7.8
	7.51322	-7.81667
	3.15816	-7.83333
	5.61036	-7.85
	7.31286	-7.86667
	5.65039	-7.88333
	6.47284	-7.9
	2.22157	-7.91667
	3.15966	-7.93333
	2.90237	-7.95
	8.06832	-7.96667
	6.72265	-7.98333
	6.16768	-8
	4.91179	-8.01667
	3.05661	-8.03333
	7.19142	-8.05
	5.93059	-8.06667
	9.2488	-8.08333
	2.74755	-8.1
	0.641389	-8.11667
	1.77752	-8.13333
	0.526248	-8.15
	6.47683	-8.16667
	6.76943	-8.18333
	5.03449	-8.2
	3.03377	-8.21667
	4.5696	-8.23333
	2.01375	-8.25
	2.90132	-8.26667
	8.31359	-8.28333
	5.49573	-8.3
	3.93584	-8.31667
	5.865	-8.33333
	2.94873	-8.35
	2.89601	-8.36667
	1.96789	-8.38333
	8.63475	-8.4
	3.89128	-8.41667
	9.65211	-8.43333
	3.9893	-8.45
	3.46318	-8.46667
	2.67476	-8.48333
	9.9883	-8.5
	7.8257	-8.51667
	5.62192	-8.53333
	3.81543	-8.55
	3.62229	-8.56667
	6.0581	-8.58333
	5.82822	-8.6
	8.1153	-8.61667
	3.76811	-8.63333
	2.5372	-8.65
	7.01213	-8.66667
	6.14268	-8.68333
	8.01926	-8.7
	4.72963	-8.71667
	2.13112	-8.73333
	2.41398	-8.75
	5.80272	-8.76667
	6.58396	-8.78333
	4.57435	-8.8
	7.38274	-8.81667
	4.15438	-8.83333
	4.32203	-8.85
	4.48423	-8.86667
	3.74259	-8.88333
	2.61067	-8.9
	4.71005	-8.91667
	3.16007	-8.93333
	3.32302	-8.95
	2.9807	-8.96667
	0.810562	-8.98333
	7.68431	-9
	4.86829	-9.01667
	7.68452	-9.03333
	5.74172	-9.05
	2.74	-9.06667
	4.07822	-9.08333
	8.1469	-9.1
	6.21188	-9.11667
	8.40221	-9.13333
	1.51119	-9.15
	2.66147	-9.16667
	2.08703	-9.18333
	7.60617	-9.2
	1.84906	-9.21667
	5.62976	-9.23333
	7.9158	-9.25
	3.80515	-9.26667
	2.51349	-9.28333
	6.09447	-9.3
	5.56912	-9.31667
	2.90805	-9.33333
	9.62288	-9.35
	3.80083	-9.36667
	1.81732	-9.38333
	5.79196	-9.4
	6.20117	-9.41667
	2.19159	-9.43333
	1.83446	-9.45
	4.85645	-9.46667
	3.8371	-9.48333
	4.55947	-9.5
	0.638076	-9.51667
	7.65076	-9.53333
	4.43999	-9.55
	4.4622	-9.56667
	3.46099	-9.58333
	0.840322	-9.6
	3.6495	-9.61667
	1.45563	-9.63333
	1.97861	-9.65
	1.14293	-9.66667
	1.60218	-9.68333
	8.09122	-9.7
	2.74237	-9.71667
	4.65338	-9.73333
	3.78962	-9.75
	5.19327	-9.76667
	2.81118	-9.78333
	1.97721	-9.8
	0.56362	-9.81667
	1.53537	-9.83333
	6.15371	-9.85
	2.11146	-9.86667
	2.93292	-9.88333
	5.55381	-9.9
	3.14671	-9.91667
	2.08895	-9.93333
	0.498268	-9.95
	-0.439964	-9.96667
	-0.499123	-9.98333
	-0.744102	-10
	-1.46245	-10.0167
	0.360269	-10.0333
	-1.0764	-10.05
	0.185634	-10.0667
	0.253765	-10.0833
	0.420797	-10.1
	0.772559	-10.1167
	-0.959813	-10.1333
	-0.461429	-10.15
	0.236684	-10.1667
	0.611783	-10.1833
	0.306021	-10.2
	-0.758444	-10.2167
	0.494669	-10.2333
	0.756456	-10.25
	0.142954	-10.2667
	-0.104345	-10.2833
	-1.23784	-10.3
	-0.0040684	-10.3167
	0.47234	-10.3333
	0.548025	-10.35
	-0.783901	-10.3667
	2.31539	-10.3833
	3.23454	-10.4
	3.03949	-10.4167
	2.11733	-10.4333
	-1.24789	-10.45
	0.143143	-10.4667
	0.156627	-10.4833
	-0.129647	-10.5
	0.48741	-10.5167
	5.50436	-10.5333
	2.42609	-10.55
	2.34321	-10.5667
	3.45086	-10.5833
	3.15282	-10.6
	1.30651	-10.6167
	1.27861	-10.6333
	2.28822	-10.65
	2.31924	-10.6667
	-0.341565	-10.6833
	2.57783	-10.7
	0.476503	-10.7167
	0.953666	-10.7333
	4.92388	-10.75
	5.20052	-10.7667
	1.95569	-10.7833
	0.209355	-10.8
	-0.0827121	-10.8167
	0.945601	-10.8333
	-0.393784	-10.85
	-0.730856	-10.8667
	0.227279	-10.8833
	0.256914	-10.9
	-0.194702	-10.9167
	0.3846	-10.9333
	0.0225239	-10.95
	-0.187969	-10.9667
	0.219245	-10.9833
	-2.1375	-11
	-2.14378	-11.0167
	-1.9232	-11.0333
	0.688051	-11.05
	0.978236	-11.0667
	-4.16587	-11.0833
	-0.641564	-11.1
	-3.10626	-11.1167
	1.63535	-11.1333
	0.146771	-11.15
	0.536889	-11.1667
	5.82349	-11.1833
	2.85361	-11.2
	2.85232	-11.2167
	-0.158623	-11.2333
	-1.61124	-11.25
	0.0667033	-11.2667
	-0.923164	-11.2833
	-1.15058	-11.3
	-1.16706	-11.3167
	2.04607	-11.3333
	3.02456	-11.35
	1.3111	-11.3667
	1.64085	-11.3833
	5.1503	-11.4
	4.40345	-11.4167
	2.94465	-11.4333
	2.41319	-11.45
	7.18221	-11.4667
	5.13877	-11.4833
	1.31128	-11.5
	5.57986	-11.5167
	6.28284	-11.5333
	3.9328	-11.55
	9.42229	-11.5667
	2.52402	-11.5833
	5.15303	-11.6
	6.6891	-11.6167
	1.48486	-11.6333
	1.71751	-11.65
	0.396176	-11.6667
	1.28074	-11.6833
	8.76098	-11.7
	7.74709	-11.7167
	8.15101	-11.7333
	1.68872	-11.75
	3.16344	-11.7667
	1.26567	-11.7833
	5.88017	-11.8
	3.85691	-11.8167
	6.10924	-11.8333
	9.36683	-11.85
	3.50093	-11.8667
	3.71584	-11.8833
	11.0273	-11.9
	8.26473	-11.9167
	4.6758	-11.9333
	2.46709	-11.95
	5.76111	-11.9667
	7.42567	-11.9833
	9.1321	-12
	3.238	-12.0167
	1.17612	-12.0333
	0.411219	-12.05
	2.04768	-12.0667
	1.43382	-12.0833
	10.7566	-12.1
	7.10804	-12.1167
	4.95637	-12.1333
	2.96579	-12.15
	-0.514772	-12.1667
	4.1856	-12.1833
	2.99766	-12.2
	7.95815	-12.2167
	6.01679	-12.2333
	9.40411	-12.25
	1.75432	-12.2667
	1.41799	-12.2833
	1.21019	-12.3
	1.67245	-12.3167
	-0.65158	-12.3333
	-1.05877	-12.35
	-0.522373	-12.3667
	0.895848	-12.3833
	0.49643	-12.4
	0.5436	-12.4167
	-1.20235	-12.4333
	-0.477475	-12.45
	-1.08294	-12.4667
	-3.90404	-12.4833
	-0.685764	-12.5
	-7.42802	-12.5167
	-3.41649	-12.5333
	-1.02212	-12.55
	4.45261	-12.5667
	7.73294	-12.5833
	-0.472963	-12.6
	-5.74603	-12.6167
	-6.45495	-12.6333
	-4.4336	-12.65
	-8.99691	-12.6667
	-4.86841	-12.6833
	-10.6076	-12.7
	-3.22633	-12.7167
	-8.00003	-12.7333
	-3.19576	-12.75
	-4.92391	-12.7667
	-8.08387	-12.7833
	-2.04719	-12.8
	8.76235	-12.8167
	6.10081	-12.8333
	4.09915	-12.85
	6.06602	-12.8667
	1.66827	-12.8833
	0.567469	-12.9
	2.3028	-12.9167
	8.13914	-12.9333
	4.65558	-12.95
	3.18062	-12.9667
	9.71825	-12.9833
	4.31147	-13
	5.44762	-13.0167
	6.20298	-13.0333
	3.01865	-13.05
	0.532367	-13.0667
	1.7359	-13.0833
	6.7112	-13.1
	-7.50166	-13.1167
	-10.2142	-13.1333
	-6.64627	-13.15
	-1.99529	-13.1667
	-3.00573	-13.1833
	-5.15684	-13.2
	-3.30074	-13.2167
	1.23094	-13.2333
	1.04036	-13.25
	0.0383632	-13.2667
	-2.02403	-13.2833
	0.610311	-13.3
	9.99622	-13.3167
	6.71569	-13.3333
	7.06665	-13.35
	3.58776	-13.3667
	2.08835	-13.3833
	1.80839	-13.4
	4.83401	-13.4167
	-2.33927	-13.4333
	-5.80071	-13.45
	-5.47809	-13.4667
	-7.83666	-13.4833
	-3.4418	-13.5
	-6.66564	-13.5167
	-5.92907	-13.5333
	-5.82185	-13.55
	5.12775	-13.5667
	9.51519	-13.5833
	5.90592	-13.6
	5.77221	-13.6167
	1.15352	-13.6333
	2.10942	-13.65
	-7.29878	-13.6667
	-2.20662	-13.6833
	0.990694	-13.7
	-1.47988	-13.7167
	-2.23567	-13.7333
	-0.481288	-13.75
	2.40733	-13.7667
	2.27927	-13.7833
	10.0684	-13.8
	4.34462	-13.8167
	10.2551	-13.8333
	3.26632	-13.85
	5.47237	-13.8667
	8.65791	-13.8833
	4.32612	-13.9
	7.91101	-13.9167
	6.18079	-13.9333
	5.49703	-13.95
	4.18831	-13.9667
	1.51814	-13.9833
	1.8022	-14
	1.10603	-14.0167
	-0.415301	-14.0333
	0.402967	-14.05
	-0.131514	-14.0667
	3.45593	-14.0833
	9.13518	-14.1
	5.55561	-14.1167
	7.75745	-14.1333
	5.50028	-14.15
	7.41454	-14.1667
	3.8072	-14.1833
	3.48641	-14.2
	9.62988	-14.2167
	1.27568	-14.2333
	2.64481	-14.25
	2.30656	-14.2667
	9.96555	-14.2833
	4.59353	-14.3
	5.9552	-14.3167
	6.12067	-14.3333
	1.91158	-14.35
	3.79182	-14.3667
	7.60874	-14.3833
	3.76976	-14.4
	6.24718	-14.4167
	5.15866	-14.4333
	1.75948	-14.45
	1.79202	-14.4667
	2.50779	-14.4833
	8.6087	-14.5
	9.11771	-14.5167
	5.01273	-14.5333
	4.63609	-14.55
	6.09959	-14.5667
	4.86482	-14.5833
	3.25183	-14.6
	4.50151	-14.6167
	4.76815	-14.6333
	3.56059	-14.65
	2.05166	-14.6667
	0.106581	-14.6833
	1.18026	-14.7
	5.31272	-14.7167
	5.97603	-14.7333
	2.55834	-14.75
	3.89547	-14.7667
	4.4523	-14.7833
	4.28511	-14.8
	1.7058	-14.8167
	1.39317	-14.8333
	0.47908	-14.85
	2.0408	-14.8667
	9.20918	-14.8833
	3.77015	-14.9
	8.06671	-14.9167
	3.61735	-14.9333
	3.00944	-14.95
	1.85122	-14.9667
	2.62137	-14.9833
	6.22787	-15
	3.04457	-15.0167
	4.76988	-15.0333
	5.16103	-15.05
	1.64608	-15.0667
	3.26573	-15.0833
	1.52508	-15.1
	1.94483	-15.1167
	7.93295	-15.1333
	5.96809	-15.15
	3.71595	-15.1667
	5.4191	-15.1833
	1.32269	-15.2
	2.16607	-15.2167
	0.852474	-15.2333
	1.6419	-15.25
	6.22824	-15.2667
	4.08405	-15.2833
	4.53202	-15.3
	1.73396	-15.3167
	4.31661	-15.3333
	3.29453	-15.35
	5.4437	-15.3667
	8.89213	-15.3833
	2.21905	-15.4
	-0.104582	-15.4167
	2.47962	-15.4333
	4.35169	-15.45
	4.07437	-15.4667
	3.65243	-15.4833
	1.33033	-15.5
	2.34511	-15.5167
	6.45947	-15.5333
	4.93521	-15.55
	0.808513	-15.5667
	6.41183	-15.5833
	6.54	-15.6
	4.3901	-15.6167
	9.16471	-15.6333
	-3.38212	-15.65
	-2.89414	-15.6667
	6.87195	-15.6833
	7.86333	-15.7
	6.35906	-15.7167
	3.49043	-15.7333
	3.60722	-15.75
	6.42618	-15.7667
	5.66948	-15.7833
	3.41259	-15.8
	-2.10357	-15.8167
	0.664551	-15.8333
	-0.846688	-15.85
	-5.0006	-15.8667
	-9.92797	-15.8833
	-4.14182	-15.9
	-7.71802	-15.9167
	-4.29955	-15.9333
	-1.57209	-15.95
	-4.63855	-15.9667
	-7.6511	-15.9833
	-7.32315	-16
	-5.04222	-16.0167
	-2.89754	-16.0333
	-2.61064	-16.05
	-3.35192	-16.0667
	-7.84963	-16.0833
	-9.45729	-16.1
	-8.20914	-16.1167
	-2.95022	-16.1333
	-7.65011	-16.15
	-7.58399	-16.1667
	-9.14995	-16.1833
	4.25053	-16.2
	9.01185	-16.2167
	5.72856	-16.2333
	9.46251	-16.25
	4.49417	-16.2667
	8.01834	-16.2833
	2.85445	-16.3
	1.65258	-16.3167
	9.54583	-16.3333
	5.17683	-16.35
	9.17688	-16.3667
	4.86339	-16.3833
	3.51161	-16.4
	8.08422	-16.4167
	4.35384	-16.4333
	2.75723	-16.45
	6.79915	-16.4667
	3.20652	-16.4833
	1.57377	-16.5
	-0.25848	-16.5167
	1.30368	-16.5333
	4.2161	-16.55
	5.98804	-16.5667
	7.65693	-16.5833
	6.26935	-16.6
	5.00031	-16.6167
	0.0519082	-16.6333
	-4.91139	-16.65
	-2.28923	-16.6667
	-7.2502	-16.6833
	-3.26119	-16.7
	-3.05473	-16.7167
	-4.95328	-16.7333
	-7.8179	-16.75
	1.18599	-16.7667
	1.64182	-16.7833
	3.82784	-16.8
	0.0180798	-16.8167
	-3.01685	-16.8333
	-2.13104	-16.85
	-0.134883	-16.8667
	-0.243103	-16.8833
	-1.75546	-16.9
	0.530876	-16.9167
	-2.36149	-16.9333
	-8.2769	-16.95
	-2.18868	-16.9667
	-1.57932	-16.9833
	-2.35541	-17
	-6.86733	-17.0167
	0.525832	-17.0333
	-1.01067	-17.05
	2.05198	-17.0667
	9.01716	-17.0833
	2.92999	-17.1
	0.215129	-17.1167
	2.5133	-17.1333
	-1.85931	-17.15
	-6.46554	-17.1667
	-2.12746	-17.1833
	-4.60318	-17.2
	-4.82189	-17.2167
	0.261487	-17.2333
	-0.803015	-17.25
	-2.63448	-17.2667
	-5.43669	-17.2833
	-4.87001	-17.3
	-0.529604	-17.3167
	-1.05089	-17.3333
	-0.694203	-17.35
	-0.85506	-17.3667
	0.210805	-17.3833
	0.226341	-17.4
	-0.564134	-17.4167
	0.0409657	-17.4333
	-1.1243	-17.45
	0.243124	-17.4667
	0.0985207	-17.4833
	0.192307	-17.5
	2.97888	-17.5167
	3.79697	-17.5333
	-1.73987	-17.55
	-0.69848	-17.5667
	0.697826	-17.5833
	3.22041	-17.6
	6.2559	-17.6167
	6.2532	-17.6333
	8.85831	-17.65
	7.79186	-17.6667
	7.13209	-17.6833
	3.47031	-17.7
	1.71791	-17.7167
	9.5385	-17.7333
	7.25762	-17.75
	8.06666	-17.7667
	1.95321	-17.7833
	5.31167	-17.8
	11.0501	-17.8167
	9.2737	-17.8333
	1.87765	-17.85
	3.52696	-17.8667
	3.32042	-17.8833
	9.48192	-17.9
	2.76045	-17.9167
	1.42661	-17.9333
	7.16438	-17.95
	3.56576	-17.9667
	5.76951	-17.9833
	10.0964	-18
	4.4777	-18.0167
	3.51775	-18.0333
	5.29246	-18.05
	3.13148	-18.0667
	-0.13319	-18.0833
	-0.181463	-18.1
	0.453158	-18.1167
	1.99619	-18.1333
	3.64892	-18.15
	6.02226	-18.1667
	4.4525	-18.1833
	0.315538	-18.2
	1.09454	-18.2167
	-0.994877	-18.2333
	3.0291	-18.25
	1.56243	-18.2667
	2.2943	-18.2833
	-4.87266	-18.3
	-3.88657	-18.3167
	-0.00158859	-18.3333
	-5.09943	-18.35
	-4.8446	-18.3667
	-6.81304	-18.3833
	-9.38695	-18.4
	-5.90491	-18.4167
	-2.99756	-18.4333
	-10.1496	-18.45
	-6.27133	-18.4667
	-8.37219	-18.4833
	-2.92345	-18.5
	-7.2756	-18.5167
	-3.44201	-18.5333
	2.77508	-18.55
	6.84449	-18.5667
	5.57717	-18.5833
	6.80585	-18.6
	3.60166	-18.6167
	4.39102	-18.6333
	10.0774	-18.65
	6.29469	-18.6667
	7.16548	-18.6833
	3.95756	-18.7
	2.8549	-18.7167
	1.51524	-18.7333
	0.131196	-18.75
	1.66521	-18.7667
	4.95434	-18.7833
	-0.479769	-18.8
	-3.53769	-18.8167
	-0.936997	-18.8333
	5.63059	-18.85
	1.14454	-18.8667
	0.745835	-18.8833
	3.59124	-18.9
	6.46102	-18.9167
	4.62452	-18.9333
	-0.960423	-18.95
	4.13458	-18.9667
	1.48763	-18.9833
	1.39347	-19
	-0.245808	-19.0167
	1.29008	-19.0333
	3.66124	-19.05
	7.95174	-19.0667
	4.38479	-19.0833
	4.37826	-19.1
	1.88761	-19.1167
	1.82078	-19.1333
	1.49872	-19.15
	0.0785663	-19.1667
	0.288451	-19.1833
	1.21726	-19.2
	-1.30215	-19.2167
	-2.02544	-19.2333
	-0.0211283	-19.25
	0.984628	-19.2667
	2.08927	-19.2833
	1.30869	-19.3
	3.78449	-19.3167
	6.47989	-19.3333
	3.56708	-19.35
	4.73815	-19.3667
	4.40985	-19.3833
	2.10419	-19.4
	5.16589	-19.4167
	8.91605	-19.4333
	5.73002	-19.45
	6.03812	-19.4667
	4.59575	-19.4833
	3.03319	-19.5
	1.78483	-19.5167
	4.94938	-19.5333
	5.63381	-19.55
	3.54647	-19.5667
	4.33963	-19.5833
	6.24718	-19.6
	5.15166	-19.6167
	7.08371	-19.6333
	4.86554	-19.65
	0.434524	-19.6667
	2.85745	-19.6833
	2.29491	-19.7
	4.95378	-19.7167
	3.00308	-19.7333
	1.70073	-19.75
	1.26977	-19.7667
	2.73005	-19.7833
	9.26707	-19.8
	5.10745	-19.8167
	4.90191	-19.8333
	4.2151	-19.85
	2.54282	-19.8667
	2.20549	-19.8833
	5.65279	-19.9
	5.15421	-19.9167
	4.18411	-19.9333
	2.89813	-19.95
	1.07392	-19.9667
	3.92969	-19.9833
	2.51827	-20
	4.21872	-20.0167
	7.14882	-20.0333
	4.80717	-20.05
	2.2879	-20.0667
	1.6015	-20.0833
	6.62663	-20.1
	3.51254	-20.1167
	2.19325	-20.1333
	1.43287	-20.15
	7.69088	-20.1667
	3.80645	-20.1833
	2.30945	-20.2
	1.68441	-20.2167
	1.25926	-20.2333
	5.33067	-20.25
	1.16341	-20.2667
	0.204804	-20.2833
	-0.600775	-20.3
	2.11415	-20.3167
	1.29583	-20.3333
	0.72737	-20.35
	2.25615	-20.3667
	0.682566	-20.3833
	1.17513	-20.4
	7.32335	-20.4167
	3.66176	-20.4333
	4.48174	-20.45
	5.60453	-20.4667
	1.08178	-20.4833
	0.803145	-20.5
	0.923434	-20.5167
	-0.59242	-20.5333
	-1.6163	-20.55
	2.96916	-20.5667
	4.53714	-20.5833
	3.80497	-20.6
	6.92493	-20.6167
	2.92993	-20.6333
	4.20227	-20.65
	2.94399	-20.6667
	1.80119	-20.6833
	4.77833	-20.7
	0.784498	-20.7167
	0.671172	-20.7333
	-2.64	-20.75
	-2.66445	-20.7667
	-9.69913	-20.7833
	-3.0623	-20.8
	-6.82067	-20.8167
	-5.41805	-20.8333
	-1.57335	-20.85
	-6.21014	-20.8667
	-4.64088	-20.8833
	7.37257	-20.9
	3.84925	-20.9167
	2.1913	-20.9333
	4.61791	-20.95
	8.51279	-20.9667
	8.09038	-20.9833
	4.4345	-21
	1.89519	-21.0167
	0.781271	-21.0333
	2.30996	-21.05
	3.09659	-21.0667
	7.5814	-21.0833
	5.59906	-21.1
	7.78389	-21.1167
	1.8982	-21.1333
	3.34616	-21.15
	6.52904	-21.1667
	5.51413	-21.1833
	2.81683	-21.2
	6.07701	-21.2167
	4.39902	-21.2333
	2.03857	-21.25
	1.88041	-21.2667
	2.43024	-21.2833
	9.20163	-21.3
	5.04096	-21.3167
	8.2284	-21.3333
	2.23514	-21.35
	2.50014	-21.3667
	3.25004	-21.3833
	7.60564	-21.4
	1.07843	-21.4167
	2.79219	-21.4333
	6.18964	-21.45
	6.46417	-21.4667
	2.21463	-21.4833
	1.44297	-21.5
	2.03516	-21.5167
	7.83137	-21.5333
	2.19449	-21.55
	4.45196	-21.5667
	8.3312	-21.5833
	2.98403	-21.6
	4.96836	-21.6167
	8.24823	-21.6333
	4.59792	-21.65
	4.13698	-21.6667
	4.76084	-21.6833
	2.67239	-21.7
	0.928631	-21.7167
	1.39278	-21.7333
	0.833368	-21.75
	2.82052	-21.7667
	7.51461	-21.7833
	3.69128	-21.8
	3.44966	-21.8167
	6.84355	-21.8333
	3.18618	-21.85
	6.47032	-21.8667
	7.57563	-21.8833
	4.7393	-21.9
	6.48407	-21.9167
	3.57209	-21.9333
	1.13474	-21.95
	1.88514	-21.9667
	5.66626	-21.9833
	8.51741	-22
	3.16861	-22.0167
	5.99403	-22.0333
	3.6939	-22.05
	5.06857	-22.0667
	7.32287	-22.0833
	4.5427	-22.1
	6.4407	-22.1167
	5.29889	-22.1333
	3.38982	-22.15
	2.07871	-22.1667
	2.72541	-22.1833
	9.4979	-22.2
	8.49343	-22.2167
	3.52026	-22.2333
	3.7254	-22.25
	3.37565	-22.2667
	8.31244	-22.2833
	4.79164	-22.3
	5.5537	-22.3167
	4.27456	-22.3333
	1.53284	-22.35
	2.06756	-22.3667
	1.71115	-22.3833
	7.13342	-22.4
	4.5383	-22.4167
	9.57218	-22.4333
	4.72978	-22.45
	3.63726	-22.4667
	6.82063	-22.4833
	7.06589	-22.5
	8.00416	-22.5167
	4.40824	-22.5333
	1.75082	-22.55
	2.6771	-22.5667
	6.09244	-22.5833
	7.66839	-22.6
	4.36402	-22.6167
	7.27839	-22.6333
	5.12008	-22.65
	4.14007	-22.6667
	4.62953	-22.6833
	5.67591	-22.7
	8.02186	-22.7167
	1.48012	-22.7333
	1.28684	-22.75
	1.97066	-22.7667
	0.119232	-22.7833
	0.726951	-22.8
	1.52678	-22.8167
	8.79784	-22.8333
	5.15966	-22.85
	8.44025	-22.8667
	3.78967	-22.8833
	3.24365	-22.9
	8.63329	-22.9167
	3.57637	-22.9333
	5.04957	-22.95
	8.27854	-22.9667
	3.26158	-22.9833
	0.965676	-23
	8.2234	-23.0167
	4.74242	-23.0333
	9.43235	-23.05
	5.54296	-23.0667
	4.51683	-23.0833
	7.6002	-23.1
	3.48736	-23.1167
	0.998235	-23.1333
	5.02685	-23.15
	4.62548	-23.1667
	3.39911	-23.1833
	2.73214	-23.2
	3.61633	-23.2167
	9.11924	-23.2333
	8.96632	-23.25
	2.54126	-23.2667
	6.50957	-23.2833
	7.88174	-23.3
	6.43321	-23.3167
	5.4057	-23.3333
	5.44448	-23.35
	3.5793	-23.3667
	3.06436	-23.3833
	9.00311	-23.4
	6.26582	-23.4167
	7.88122	-23.4333
	3.38158	-23.45
	7.66858	-23.4667
	6.08066	-23.4833
	4.8301	-23.5
	6.66542	-23.5167
	3.6137	-23.5333
	2.6037	-23.55
	9.20458	-23.5667
	8.57378	-23.5833
	7.25124	-23.6
	3.53714	-23.6167
	4.1079	-23.6333
	8.97659	-23.65
	4.38406	-23.6667
	8.02568	-23.6833
	2.59301	-23.7
	2.98405	-23.7167
	2.49768	-23.7333
	9.98798	-23.75
	10.2101	-23.7667
	6.7692	-23.7833
	3.16588	-23.8
	8.34211	-23.8167
	6.65426	-23.8333
	7.0466	-23.85
	2.12552	-23.8667
	4.6336	-23.8833
	10.1092	-23.9
	5.41316	-23.9167
	4.27139	-23.9333
	5.8183	-23.95
	4.12991	-23.9667
	8.78924	-23.9833
	4.68629	-24
	5.94242	-24.0167
	5.22605	-24.0333
	2.56372	-24.05
	1.99874	-24.0667
	6.77924	-24.0833
	6.04039	-24.1
	2.16557	-24.1167
	8.44798	-24.1333
	1.76321	-24.15
	3.61113	-24.1667
	8.60122	-24.1833
	5.66867	-24.2
	4.50575	-24.2167
	5.71056	-24.2333
	3.86123	-24.25
	2.14338	-24.2667
	3.35235	-24.2833
	8.27538	-24.3
	7.60281	-24.3167
	5.25062	-24.3333
	4.36864	-24.35
	6.31509	-24.3667
	6.17421	-24.3833
	1.96491	-24.4
	0.414362	-24.4167
	0.26595	-24.4333
	5.84138	-24.45
	2.7627	-24.4667
	4.70719	-24.4833
	1.39655	-24.5
	1.65607	-24.5167
	3.54005	-24.5333
	8.24942	-24.55
	8.29377	-24.5667
	5.33174	-24.5833
	2.40362	-24.6
	2.79844	-24.6167
	4.93081	-24.6333
	5.28237	-24.65
	2.26589	-24.6667
	4.59735	-24.6833
	0.993808	-24.7
	6.35271	-24.7167
	2.49409	-24.7333
	2.21874	-24.75
	8.61136	-24.7667
	5.67594	-24.7833
	3.87707	-24.8
	5.63189	-24.8167
	4.38929	-24.8333
	2.54816	-24.85
	4.08933	-24.8667
	8.29956	-24.8833
	8.84803	-24.9
	3.81821	-24.9167
	0.89401	-24.9333
	1.33674	-24.95
	1.67757	-24.9667
	1.99081	-24.9833
	7.01234	-25
	5.51364	-25.0167
	9.038	-25.0333
	2.66067	-25.05
	2.03822	-25.0667
	7.15275	-25.0833
	6.85519	-25.1
	2.77085	-25.1167
	5.50935	-25.1333
	2.64902	-25.15
	2.64095	-25.1667
	0.956761	-25.1833
	2.15588	-25.2
	0.887609	-25.2167
	2.68001	-25.2333
	2.85763	-25.25
	8.77051	-25.2667
	6.03566	-25.2833
	6.68299	-25.3
	3.0501	-25.3167
	3.01065	-25.3333
	8.81436	-25.35
	2.0285	-25.3667
	4.31596	-25.3833
	6.70548	-25.4
	3.34128	-25.4167
	1.59496	-25.4333
	4.93418	-25.45
	8.09291	-25.4667
	5.09536	-25.4833
	4.59438	-25.5
	5.56144	-25.5167
	4.04588	-25.5333
	4.55747	-25.55
	5.35524	-25.5667
	4.8002	-25.5833
	5.58845	-25.6
	4.27747	-25.6167
	2.01424	-25.6333
	1.2096	-25.65
	4.05645	-25.6667
	6.73602	-25.6833
	3.0911	-25.7
	7.72518	-25.7167
	3.04076	-25.7333
	2.43452	-25.75
	2.13647	-25.7667
	0.633426	-25.7833
	0.390763	-25.8
	0.720075	-25.8167
	3.82964	-25.8333
	7.86453	-25.85
	6.26664	-25.8667
	1.65979	-25.8833
	5.22491	-25.9
	2.6277	-25.9167
	1.32922	-25.9333
	2.0491	-25.95
	2.80377	-25.9667
	7.41607	-25.9833
	1.25934	-26
	-0.580073	-26.0167
	-1.2686	-26.0333
	-0.28018	-26.05
	-6.07598	-26.0667
	-4.41034	-26.0833
	-0.350164	-26.1
	-0.846378	-26.1167
	-3.75429	-26.1333
	-1.80783	-26.15
	-1.25709	-26.1667
	-2.2825	-26.1833
	-0.844526	-26.2
	-1.81018	-26.2167
	0.0115799	-26.2333
	-2.32484	-26.25
	-1.83859	-26.2667
	-1.50468	-26.2833
	-1.30445	-26.3
	-1.48808	-26.3167
	0.45785	-26.3333
	-2.15097	-26.35
	3.67725	-26.3667
	0.335095	-26.3833
	1.80353	-26.4
	2.3707	-26.4167
	2.99705	-26.4333
	6.70131	-26.45
	3.52147	-26.4667
	1.47184	-26.4833
	2.60463	-26.5
	9.02953	-26.5167
	7.44023	-26.5333
	6.31553	-26.55
	1.56333	-26.5667
	3.8466	-26.5833
	10.3845	-26.6
	8.32238	-26.6167
	6.09897	-26.6333
	2.68399	-26.65
	4.59091	-26.6667
	10.7116	-26.6833
	9.36263	-26.7
	2.22612	-26.7167
	4.15032	-26.7333
	2.99704	-26.75
	6.24738	-26.7667
	4.31647	-26.7833
	3.41747	-26.8
	6.04524	-26.8167
	2.08267	-26.8333
	0.697177	-26.85
	2.68329	-26.8667
	2.64459	-26.8833
	2.50932	-26.9
	8.22902	-26.9167
	2.52016	-26.9333
	3.76946	-26.95
	5.8469	-26.9667
	3.774	-26.9833
	2.01482	-27
	0.704766	-27.0167
	0.959583	-27.0333
	1.59362	-27.05
	2.88395	-27.0667
	5.77152	-27.0833
	1.27687	-27.1
	2.45104	-27.1167
	2.12956	-27.1333
	0.915703	-27.15
	3.68003	-27.1667
	3.23819	-27.1833
	1.49397	-27.2
	1.37893	-27.2167
	1.76353	-27.2333
	1.35851	-27.25
	2.29906	-27.2667
	4.59785	-27.2833
	5.60875	-27.3
	2.86041	-27.3167
	5.92888	-27.3333
	2.39953	-27.35
	3.39584	-27.3667
	2.55076	-27.3833
	1.29717	-27.4
	1.12882	-27.4167
	7.73978	-27.4333
	3.3615	-27.45
	6.6072	-27.4667
	4.19194	-27.4833
	3.75672	-27.5
	2.04353	-27.5167
	2.69649	-27.5333
	9.51996	-27.55
	9.05776	-27.5667
	7.49536	-27.5833
	3.48798	-27.6
	7.35905	-27.6167
	6.87785	-27.6333
	6.87495	-27.65
	3.86221	-27.6667
	2.22573	-27.6833
	9.7132	-27.7
	5.2565	-27.7167
	5.72157	-27.7333
	6.42121	-27.75
	3.48265	-27.7667
	6.50943	-27.7833
	3.5485	-27.8
	4.343	-27.8167
	6.34235	-27.8333
	4.85189	-27.85
	2.34625	-27.8667
	1.55842	-27.8833
	2.84227	-27.9
	6.71164	-27.9167
	3.31088	-27.9333
	5.88486	-27.95
	6.12799	-27.9667
	2.15377	-27.9833
	0.677158	-28
	2.60743	-28.0167
	2.6764	-28.0333
	3.34327	-28.05
	6.34397	-28.0667
	3.01209	-28.0833
	2.37866	-28.1
	6.42623	-28.1167
	3.03299	-28.1333
	0.109532	-28.15
	-0.346965	-28.1667
	-0.336748	-28.1833
	-2.93914	-28.2
	-2.68225	-28.2167
	-1.87084	-28.2333
	-1.79039	-28.25
	-4.52484	-28.2667
	-1.76778	-28.2833
	-3.82075	-28.3
	-6.70385	-28.3167
	-4.79268	-28.3333
	-7.64081	-28.35
	-5.12957	-28.3667
	-2.74388	-28.3833
	-5.31637	-28.4
	-4.73264	-28.4167
	-6.3906	-28.4333
	-10.0881	-28.45
	-3.36603	-28.4667
	-3.5213	-28.4833
	-7.37409	-28.5
	-6.0746	-28.5167
	-8.64416	-28.5333
	-0.47621	-28.55
	-1.89319	-28.5667
	-3.50837	-28.5833
	-0.768021	-28.6
	1.56848	-28.6167
	0.56594	-28.6333
	0.537704	-28.65
	1.90039	-28.6667
	0.183043	-28.6833
	0.672977	-28.7
	0.469909	-28.7167
	-0.0695074	-28.7333
	-0.04696	-28.75
	1.87209	-28.7667
	6.06584	-28.7833
	4.09155	-28.8
	-0.00344418	-28.8167
	-2.10817	-28.8333
	-3.42462	-28.85
	1.53275	-28.8667
	0.786495	-28.8833
	-4.6876	-28.9
	4.4131	-28.9167
	0.740099	-28.9333
	0.374137	-28.95
	-0.0773622	-28.9667
	4.37817	-28.9833
	3.26451	-29
	2.12788	-29.0167
	5.51349	-29.0333
	4.18555	-29.05
	-0.634198	-29.0667
	5.00068	-29.0833
	3.6415	-29.1
	3.92617	-29.1167
	2.35557	-29.1333
	2.01299	-29.15
	1.74026	-29.1667
	4.08752	-29.1833
	5.77158	-29.2
	3.22845	-29.2167
	6.33275	-29.2333
	4.15807	-29.25
	2.18578	-29.2667
	2.62665	-29.2833
	1.49765	-29.3
	8.80086	-29.3167
	2.38198	-29.3333
	1.09704	-29.35
	1.63034	-29.3667
	5.74697	-29.3833
	2.23992	-29.4
	3.74664	-29.4167
	2.75509	-29.4333
	1.02298	-29.45
	5.62255	-29.4667
	6.63555	-29.4833
	9.49779	-29.5
	3.21436	-29.5167
	2.5378	-29.5333
	6.43117	-29.55
	7.17221	-29.5667
	1.75672	-29.5833
	2.89264	-29.6
	2.06611	-29.6167
	0.179301	-29.6333
	-0.96601	-29.65
	-4.40961	-29.6667
	-2.60927	-29.6833
	-0.14967	-29.7
	-0.253683	-29.7167
	1.04938	-29.7333
	-0.656645	-29.75
	-0.175736	-29.7667
	0.643565	-29.7833
	4.96933	-29.8
	7.44732	-29.8167
	2.15076	-29.8333
	2.78221	-29.85
	3.09419	-29.8667
	5.93105	-29.8833
	2.21099	-29.9
	3.46819	-29.9167
	6.57885	-29.9333
	5.45168	-29.95
	2.64011	-29.9667
	3.29975	-29.9833
	9.01562	-30
	2.40221	-30.0167
	0.477032	-30.0333
	1.38378	-30.05
	2.01029	-30.0667
	2.83901	-30.0833
	3.53179	-30.1
	3.48615	-30.1167
	2.70589	-30.1333
	0.737286	-30.15
	1.54446	-30.1667
	3.94936	-30.1833
	5.95233	-30.2
	4.2036	-30.2167
	5.57595	-30.2333
	4.08366	-30.25
	3.58845	-30.2667
	3.02345	-30.2833
	5.49825	-30.3
	5.55675	-30.3167
	7.54959	-30.3333
	4.21348	-30.35
	3.30937	-30.3667
	2.48486	-30.3833
	7.21492	-30.4
	4.37351	-30.4167
	5.63753	-30.4333
	7.16256	-30.45
	2.69038	-30.4667
	2.59098	-30.4833
	3.88025	-30.5
	8.35447	-30.5167
	2.95012	-30.5333
	5.15677	-30.55
	4.72573	-30.5667
	1.41444	-30.5833
	1.07703	-30.6
	1.70965	-30.6167
	2.45461	-30.6333
	2.0013	-30.65
	6.49692	-30.6667
	3.79965	-30.6833
	1.46365	-30.7
	0.839434	-30.7167
	5.77496	-30.7333
	4.15938	-30.75
	3.12743	-30.7667
	6.92417	-30.7833
	6.18317	-30.8
	5.15645	-30.8167
	5.57237	-30.8333
	2.77501	-30.85
	2.65462	-30.8667
	1.17981	-30.8833
	0.473635	-30.9
	1.57282	-30.9167
	5.89312	-30.9333
	2.78313	-30.95
	2.1995	-30.9667
	2.11212	-30.9833
	5.33172	-31
	3.14936	-31.0167
	4.57085	-31.0333
	1.75717	-31.05
	0.424347	-31.0667
	3.10977	-31.0833
	7.51209	-31.1
	2.2046	-31.1167
	2.7887	-31.1333
	2.94494	-31.15
	4.07004	-31.1667
	3.56538	-31.1833
	1.59213	-31.2
	2.90378	-31.2167
	2.8096	-31.2333
	4.90229	-31.25
	4.05712	-31.2667
	2.51397	-31.2833
	1.29744	-31.3
	0.178552	-31.3167
	0.638243	-31.3333
	1.09165	-31.35
	4.62453	-31.3667
	3.93578	-31.3833
	2.30089	-31.4
	2.30741	-31.4167
	3.52246	-31.4333
	4.35775	-31.45
	2.82008	-31.4667
	3.39761	-31.4833
	5.15034	-31.5
	3.47367	-31.5167
	1.24865	-31.5333
	2.12556	-31.55
	1.27823	-31.5667
	1.41013	-31.5833
	0.919283	-31.6
	6.94459	-31.6167
	3.87804	-31.6333
	0.472495	-31.65
	0.947694	-31.6667
	0.39769	-31.6833
	2.38029	-31.7
	5.03576	-31.7167
	3.52313	-31.7333
	3.03878	-31.75
	2.22138	-31.7667
	3.37453	-31.7833
	8.54852	-31.8
	5.85338	-31.8167
	5.93534	-31.8333
	2.86229	-31.85
	1.67737	-31.8667
	1.94642	-31.8833
	0.972756	-31.9
	0.969782	-31.9167
	9.08816	-31.9333
	1.28566	-31.95
	0.538742	-31.9667
	2.13414	-31.9833
	4.66434	-32
	3.54716	-32.0167
	2.16182	-32.0333
	1.13896	-32.05
	1.03068	-32.0667
	1.67839	-32.0833
	0.420834	-32.1
	1.01569	-32.1167
	1.17889	-32.1333
	1.03821	-32.15
	5.52141	-32.1667
	3.14412	-32.1833
	2.11233	-32.2
	0.832031	-32.2167
	0.0218409	-32.2333
	1.20297	-32.25
	1.99753	-32.2667
	2.65317	-32.2833
	2.14958	-32.3
	2.82712	-32.3167
	1.01095	-32.3333
	1.30303	-32.35
	0.956622	-32.3667
	0.371956	-32.3833
	0.626987	-32.4
	0.294391	-32.4167
	3.65499	-32.4333
	5.42164	-32.45
	3.64544	-32.4667
	2.40462	-32.4833
	6.93226	-32.5
	2.79598	-32.5167
	1.85245	-32.5333
	2.48994	-32.55
	0.447409	-32.5667
	6.30285	-32.5833
	4.60997	-32.6
	3.56781	-32.6167
	7.72209	-32.6333
	2.43286	-32.65
	3.05926	-32.6667
	1.70875	-32.6833
	3.57373	-32.7
	7.27831	-32.7167
	2.09263	-32.7333
	4.69827	-32.75
	7.61091	-32.7667
	2.03233	-32.7833
	-1.20797	-32.8
	-1.0941	-32.8167
	1.15584	-32.8333
	3.46468	-32.85
	3.39328	-32.8667
	7.00955	-32.8833
	3.32556	-32.9
	2.97263	-32.9167
	1.55294	-32.9333
	7.32773	-32.95
	1.49248	-32.9667
	2.72052	-32.9833
	1.68027	-33
	4.56148	-33.0167
	6.07997	-33.0333
	3.71595	-33.05
	7.17456	-33.0667
	5.08759	-33.0833
	2.85682	-33.1
	3.00489	-33.1167
	8.54371	-33.1333
	5.03885	-33.15
	6.1169	-33.1667
	4.0708	-33.1833
	0.870759	-33.2
	2.37941	-33.2167
	1.85197	-33.2333
	1.70082	-33.25
	6.72078	-33.2667
	2.14068	-33.2833
	0.749304	-33.3
[truncated: 38,580 more rows]

## Sheet: Fig 2 (D)_single cell
	Time (min)	CCW rotation rate (Hz)
		MB	Glucose	2Dg
	Prestimulus (-0.67)	2.69894	3.956	2.78392
	5 min	3.55176	9.85243	8.78298
	10 min	3.55124	10.8331	8.12491
	15 min	4.45126	10.5064	5.40314
