# Supplementary material for: Ligand sensing enhances bacterial flagellar motor output via stator recruitment
Source: eLife journal article supplement (doi:10.7554/elife.62848), 2021-04-06
Supplement: supp [file elife-62848-supp-v1.zip › elife_poa_e62848_Figure_3_source_data_1.xlsx]

## Sheet: Figure 3(A,B,C)
						Intensity (N.A)
						CCW rotation rate (Hz)
	Glucose (21 cells)					2-Deoxy-2-glucose (22 cells)					Motility buffer (21 cells)
		Average	Std. error				Average	Std. error				Average	Std. error
	Prestimulus (-0.67)	1	7.94431e-09			Prestimulus (-0.67)	1	2.00774e-09			Prestimulus (-0.67)	1	1.02217e-08
	5 min	1.17602	0.0378512			5 min	1.15009	0.0705735			5 min	1.06218	0.0712618
	10 min	1.20961	0.0521795			10 min	1.08463	0.0619363			10 min	1.08146	0.0732053
	15 min	1.23166	0.0549979			15 min	1.01227	0.0752254			15 min	1.01357	0.0577626
		Average	Std. error				Average	Std. error				Average	Std. error
	Prestimulus (-0.67)	1	1.81625e-08			Prestimulus (-0.67)	1	2.31388e-08			Prestimulus (-0.67)	1	2.2761e-08
	5 min	1.54238	0.158429			5 min	1.45939	0.129316			5 min	1.20487	0.0718115
	10 min	1.88637	0.263227			10 min	1.40412	0.126883			10 min	1.33442	0.102321
	15 min	2.30444	0.320955			15 min	1.32613	0.134754			15 min	1.3479	0.101663

## Sheet: Fig 3 (D)
					Membrane potential
				Normalized fluorescence Intensity ratio as a function of time
		Time	Intenisty		Intenisty		Intenisty		Intenisty
		minute	N.A.		N.A.		N.A.		N.A.
			Motility buffer		Glucose		2Dg		CCCP
			Average	Std. error	Average	Std. error	Average	Std. error	Average	Std. error
		5	1	2.36921e-09	1.58339	0.05536	1.06802	0.04423	0.8031	0.00979
		7	0.99917	0.000935658	1.66932	0.06253	1.0608	0.04864	0.77661	0.03373
	WT RP437	9	0.99485	0.00333	1.72186	0.06214	1.0454	0.04497	0.77416	0.03874
		11	0.98928	0.00271	1.75561	0.06152	1.03439	0.04505	0.76754	0.0395
		13	0.98393	0.00579	1.76653	0.05507	1.02613	0.04498	0.7667	0.03992
		15	0.98015	0.00381	1.76955	0.05906	1.01708	0.04787	0.76038	0.03872
		17	0.97673	0.00359	1.76884	0.0546	1.01351	0.0478	0.76246	0.03923
		19	0.97716	0.00169	1.75597	0.05057	1.01113	0.04416	0.75456	0.03989

## Sheet: Figure 3(E)_ WT RP437  
										WT RP437 average run speed
Motility buffer
0-3 min										5-8 min										10-13 min										15-18 min
incompleteRuns =										incompleteRuns =										incompleteRuns =										incompleteRuns =
no										no										no										no
Movie=0X.txt, Cells= 91, CWbias=0.22, Vrun=16.3 um/s, STD_Vrun=5.8, Vx=0.1 um/s,										Movie=0X.txt, Cells= 43, CWbias=0.34, Vrun=18.0 um/s, STD_Vrun=7.3, Vx=-0.2 um/s,										Movie=0X.txt, Cells= 68, CWbias=0.28, Vrun=18.7 um/s, STD_Vrun=7.0, Vx=-0.8 um/s,										Movie=0X.txt, Cells= 71, CWbias=0.20, Vrun=15.9 um/s, STD_Vrun=5.7, Vx=-0.0 um/s,
Movie=10X.txt, Cells= 56, CWbias=0.25, Vrun=19.3 um/s, STD_Vrun=8.1, Vx=0.7 um/s,										Movie=10X.txt, Cells= 54, CWbias=0.26, Vrun=20.9 um/s, STD_Vrun=8.7, Vx=-0.9 um/s,										Movie=10X.txt, Cells= 69, CWbias=0.26, Vrun=21.6 um/s, STD_Vrun=8.9, Vx=-0.4 um/s,										Movie=10X.txt, Cells= 75, CWbias=0.19, Vrun=20.3 um/s, STD_Vrun=8.4, Vx=-1.0 um/s,
Movie=11X.txt, Cells= 58, CWbias=0.31, Vrun=18.3 um/s, STD_Vrun=7.6, Vx=0.1 um/s,										Movie=11X.txt, Cells= 51, CWbias=0.39, Vrun=18.6 um/s, STD_Vrun=7.3, Vx=-0.3 um/s,										Movie=11X.txt, Cells= 70, CWbias=0.20, Vrun=22.5 um/s, STD_Vrun=8.7, Vx=2.0 um/s,										Movie=11X.txt, Cells= 69, CWbias=0.18, Vrun=20.6 um/s, STD_Vrun=10.0, Vx=1.0 um/s,
Movie=12X.txt, Cells= 61, CWbias=0.30, Vrun=18.0 um/s, STD_Vrun=7.6, Vx=0.1 um/s,										Movie=12X.txt, Cells= 73, CWbias=0.31, Vrun=19.1 um/s, STD_Vrun=7.3, Vx=-0.3 um/s,										Movie=12X.txt, Cells= 51, CWbias=0.25, Vrun=20.0 um/s, STD_Vrun=7.9, Vx=-1.0 um/s,										Movie=12X.txt, Cells= 49, CWbias=0.14, Vrun=20.7 um/s, STD_Vrun=8.5, Vx=1.0 um/s,
Movie=13X.txt, Cells= 62, CWbias=0.20, Vrun=18.7 um/s, STD_Vrun=7.5, Vx=0.1 um/s,										Movie=13X.txt, Cells= 77, CWbias=0.29, Vrun=21.2 um/s, STD_Vrun=8.6, Vx=2.0 um/s,										Movie=13X.txt, Cells= 75, CWbias=0.23, Vrun=23.3 um/s, STD_Vrun=9.3, Vx=-1.2 um/s,										Movie=13X.txt, Cells= 72, CWbias=0.22, Vrun=20.2 um/s, STD_Vrun=8.4, Vx=-0.1 um/s,
Movie=14X.txt, Cells=131, CWbias=0.24, Vrun=21.5 um/s, STD_Vrun=10.1, Vx=0.6 um/s,										Movie=14X.txt, Cells=163, CWbias=0.24, Vrun=23.7 um/s, STD_Vrun=10.7, Vx=0.5 um/s,										Movie=14X.txt, Cells=110, CWbias=0.30, Vrun=21.6 um/s, STD_Vrun=11.1, Vx=-0.3 um/s,										Movie=14X.txt, Cells= 71, CWbias=0.18, Vrun=21.4 um/s, STD_Vrun=9.5, Vx=-0.7 um/s,
Movie=15X.txt, Cells=149, CWbias=0.22, Vrun=23.2 um/s, STD_Vrun=12.7, Vx=1.2 um/s,										Movie=15X.txt, Cells=136, CWbias=0.18, Vrun=24.8 um/s, STD_Vrun=10.8, Vx=-0.1 um/s,										Movie=15X.txt, Cells=170, CWbias=0.24, Vrun=24.6 um/s, STD_Vrun=11.0, Vx=0.1 um/s,										Movie=15X.txt, Cells= 65, CWbias=0.24, Vrun=19.9 um/s, STD_Vrun=7.9, Vx=-0.8 um/s,
Movie=16X.txt, Cells=152, CWbias=0.19, Vrun=21.9 um/s, STD_Vrun=10.7, Vx=0.9 um/s,										Movie=16X.txt, Cells=139, CWbias=0.27, Vrun=24.0 um/s, STD_Vrun=11.3, Vx=0.5 um/s,										Movie=16X.txt, Cells=188, CWbias=0.15, Vrun=25.1 um/s, STD_Vrun=10.6, Vx=0.6 um/s,										Movie=16X.txt, Cells=138, CWbias=0.20, Vrun=19.1 um/s, STD_Vrun=9.1, Vx=-1.2 um/s,
Movie=17X.txt, Cells=143, CWbias=0.21, Vrun=24.0 um/s, STD_Vrun=11.3, Vx=1.6 um/s,										Movie=17X.txt, Cells=130, CWbias=0.24, Vrun=24.6 um/s, STD_Vrun=11.5, Vx=-0.3 um/s,										Movie=17X.txt, Cells=169, CWbias=0.18, Vrun=24.9 um/s, STD_Vrun=11.0, Vx=0.5 um/s,										Movie=17X.txt, Cells=130, CWbias=0.22, Vrun=19.0 um/s, STD_Vrun=9.1, Vx=0.4 um/s,
Movie=18X.txt, Cells= 98, CWbias=0.19, Vrun=25.5 um/s, STD_Vrun=12.6, Vx=-1.5 um/s,										Movie=18X.txt, Cells=127, CWbias=0.24, Vrun=24.1 um/s, STD_Vrun=10.8, Vx=-0.3 um/s,										Movie=18X.txt, Cells=158, CWbias=0.17, Vrun=23.9 um/s, STD_Vrun=10.6, Vx=-0.7 um/s,										Movie=18X.txt, Cells=141, CWbias=0.22, Vrun=18.8 um/s, STD_Vrun=8.6, Vx=-0.5 um/s,
Movie=19X.txt, Cells=110, CWbias=0.18, Vrun=22.5 um/s, STD_Vrun=10.2, Vx=0.1 um/s,										Movie=19X.txt, Cells=111, CWbias=0.21, Vrun=24.9 um/s, STD_Vrun=11.3, Vx=-0.2 um/s,										Movie=19X.txt, Cells=169, CWbias=0.25, Vrun=21.3 um/s, STD_Vrun=9.0, Vx=-0.7 um/s,										Movie=19X.txt, Cells=118, CWbias=0.18, Vrun=19.1 um/s, STD_Vrun=9.5, Vx=0.0 um/s,
Movie=1X.txt, Cells= 81, CWbias=0.26, Vrun=17.0 um/s, STD_Vrun=6.7, Vx=-0.4 um/s,										Movie=1X.txt, Cells= 46, CWbias=0.26, Vrun=19.2 um/s, STD_Vrun=7.7, Vx=0.4 um/s,										Movie=1X.txt, Cells= 73, CWbias=0.33, Vrun=18.4 um/s, STD_Vrun=6.6, Vx=0.8 um/s,										Movie=1X.txt, Cells= 59, CWbias=0.22, Vrun=15.0 um/s, STD_Vrun=5.4, Vx=0.2 um/s,
Movie=20X.txt, Cells= 97, CWbias=0.25, Vrun=17.9 um/s, STD_Vrun=7.3, Vx=-0.8 um/s,										Movie=20X.txt, Cells= 87, CWbias=0.33, Vrun=20.0 um/s, STD_Vrun=10.1, Vx=0.6 um/s,										Movie=20X.txt, Cells= 97, CWbias=0.29, Vrun=17.8 um/s, STD_Vrun=7.5, Vx=-0.4 um/s,										Movie=20X.txt, Cells=166, CWbias=0.25, Vrun=18.8 um/s, STD_Vrun=9.6, Vx=-1.0 um/s,
Movie=21X.txt, Cells= 85, CWbias=0.28, Vrun=17.5 um/s, STD_Vrun=7.7, Vx=0.8 um/s,										Movie=21X.txt, Cells=115, CWbias=0.25, Vrun=21.1 um/s, STD_Vrun=8.7, Vx=0.4 um/s,										Movie=21X.txt, Cells= 99, CWbias=0.33, Vrun=18.2 um/s, STD_Vrun=7.2, Vx=-0.1 um/s,										Movie=21X.txt, Cells=164, CWbias=0.20, Vrun=18.0 um/s, STD_Vrun=8.0, Vx=0.8 um/s,
Movie=22X.txt, Cells= 58, CWbias=0.24, Vrun=18.6 um/s, STD_Vrun=7.9, Vx=0.8 um/s,										Movie=22X.txt, Cells=127, CWbias=0.25, Vrun=21.7 um/s, STD_Vrun=9.3, Vx=-0.8 um/s,										Movie=22X.txt, Cells= 87, CWbias=0.26, Vrun=18.3 um/s, STD_Vrun=6.5, Vx=-1.0 um/s,										Movie=22X.txt, Cells=106, CWbias=0.26, Vrun=16.9 um/s, STD_Vrun=8.3, Vx=0.8 um/s,
Movie=23X.txt, Cells= 85, CWbias=0.22, Vrun=19.1 um/s, STD_Vrun=8.2, Vx=-0.0 um/s,										Movie=23X.txt, Cells= 95, CWbias=0.30, Vrun=20.8 um/s, STD_Vrun=8.7, Vx=-0.1 um/s,										Movie=23X.txt, Cells= 86, CWbias=0.32, Vrun=18.4 um/s, STD_Vrun=7.1, Vx=-0.6 um/s,										Movie=23X.txt, Cells= 73, CWbias=0.18, Vrun=17.5 um/s, STD_Vrun=7.1, Vx=0.3 um/s,
Movie=24X.txt, Cells= 72, CWbias=0.28, Vrun=17.4 um/s, STD_Vrun=8.4, Vx=-0.8 um/s,										Movie=24X.txt, Cells= 98, CWbias=0.27, Vrun=20.4 um/s, STD_Vrun=8.1, Vx=0.1 um/s,										Movie=24X.txt, Cells= 78, CWbias=0.31, Vrun=17.1 um/s, STD_Vrun=6.4, Vx=-1.2 um/s,										Movie=24X.txt, Cells= 81, CWbias=0.27, Vrun=16.7 um/s, STD_Vrun=7.4, Vx=-0.9 um/s,
Movie=25X.txt, Cells=100, CWbias=0.25, Vrun=18.1 um/s, STD_Vrun=7.7, Vx=0.2 um/s,										Movie=25X.txt, Cells=125, CWbias=0.23, Vrun=22.2 um/s, STD_Vrun=8.9, Vx=0.2 um/s,										Movie=25X.txt, Cells=111, CWbias=0.32, Vrun=17.8 um/s, STD_Vrun=7.0, Vx=-0.4 um/s,										Movie=25X.txt, Cells= 76, CWbias=0.27, Vrun=16.1 um/s, STD_Vrun=6.7, Vx=-0.4 um/s,
Movie=2X.txt, Cells= 54, CWbias=0.35, Vrun=15.5 um/s, STD_Vrun=6.4, Vx=-0.4 um/s,										Movie=2X.txt, Cells= 77, CWbias=0.30, Vrun=17.6 um/s, STD_Vrun=6.4, Vx=0.6 um/s,										Movie=2X.txt, Cells=116, CWbias=0.26, Vrun=19.7 um/s, STD_Vrun=7.7, Vx=-0.4 um/s,										Movie=26X.txt, Cells= 97, CWbias=0.26, Vrun=16.7 um/s, STD_Vrun=6.5, Vx=-0.3 um/s,
Movie=3X.txt, Cells= 44, CWbias=0.29, Vrun=16.5 um/s, STD_Vrun=7.2, Vx=-1.2 um/s,										Movie=3X.txt, Cells= 47, CWbias=0.33, Vrun=17.8 um/s, STD_Vrun=6.5, Vx=-1.0 um/s,										Movie=3X.txt, Cells= 60, CWbias=0.32, Vrun=20.1 um/s, STD_Vrun=7.5, Vx=1.0 um/s,										Movie=27X.txt, Cells= 92, CWbias=0.27, Vrun=16.3 um/s, STD_Vrun=6.6, Vx=-0.0 um/s,
Movie=4X.txt, Cells= 35, CWbias=0.40, Vrun=15.8 um/s, STD_Vrun=7.6, Vx=-0.1 um/s,										Movie=4X.txt, Cells= 68, CWbias=0.37, Vrun=17.9 um/s, STD_Vrun=7.7, Vx=0.4 um/s,										Movie=4X.txt, Cells= 74, CWbias=0.31, Vrun=18.2 um/s, STD_Vrun=6.8, Vx=-0.5 um/s,										Movie=2X.txt, Cells= 56, CWbias=0.30, Vrun=14.7 um/s, STD_Vrun=5.6, Vx=0.6 um/s,
Movie=5X.txt, Cells= 49, CWbias=0.34, Vrun=16.4 um/s, STD_Vrun=7.1, Vx=0.0 um/s,										Movie=5X.txt, Cells= 62, CWbias=0.32, Vrun=17.9 um/s, STD_Vrun=7.7, Vx=0.6 um/s,										Movie=5X.txt, Cells=103, CWbias=0.27, Vrun=20.0 um/s, STD_Vrun=7.3, Vx=1.0 um/s,										Movie=3X.txt, Cells= 58, CWbias=0.30, Vrun=14.8 um/s, STD_Vrun=6.2, Vx=-0.7 um/s,
Movie=6X.txt, Cells= 66, CWbias=0.30, Vrun=16.2 um/s, STD_Vrun=6.9, Vx=0.2 um/s,										Movie=6X.txt, Cells= 72, CWbias=0.30, Vrun=19.7 um/s, STD_Vrun=8.1, Vx=0.1 um/s,										Movie=6X.txt, Cells=118, CWbias=0.23, Vrun=19.5 um/s, STD_Vrun=7.8, Vx=0.7 um/s,										Movie=4X.txt, Cells= 66, CWbias=0.31, Vrun=15.2 um/s, STD_Vrun=5.9, Vx=-0.0 um/s,
Movie=7X.txt, Cells= 63, CWbias=0.36, Vrun=15.4 um/s, STD_Vrun=6.1, Vx=0.2 um/s,										Movie=7X.txt, Cells= 58, CWbias=0.25, Vrun=19.5 um/s, STD_Vrun=7.0, Vx=-0.7 um/s,										Movie=7X.txt, Cells= 92, CWbias=0.29, Vrun=20.8 um/s, STD_Vrun=9.6, Vx=-0.9 um/s,										Movie=5X.txt, Cells= 91, CWbias=0.24, Vrun=15.4 um/s, STD_Vrun=6.3, Vx=0.1 um/s,
Movie=8X.txt, Cells= 59, CWbias=0.32, Vrun=17.2 um/s, STD_Vrun=7.2, Vx=0.5 um/s,										Movie=8X.txt, Cells= 82, CWbias=0.30, Vrun=19.6 um/s, STD_Vrun=8.1, Vx=-0.3 um/s,										Movie=8X.txt, Cells= 46, CWbias=0.23, Vrun=21.6 um/s, STD_Vrun=8.6, Vx=1.6 um/s,										Movie=6X.txt, Cells= 55, CWbias=0.31, Vrun=15.9 um/s, STD_Vrun=8.1, Vx=0.7 um/s,
Movie=9X.txt, Cells= 62, CWbias=0.25, Vrun=18.5 um/s, STD_Vrun=8.1, Vx=0.1 um/s,										Movie=9X.txt, Cells= 61, CWbias=0.37, Vrun=18.0 um/s, STD_Vrun=7.5, Vx=0.9 um/s,										Movie=9X.txt, Cells= 47, CWbias=0.20, Vrun=22.6 um/s, STD_Vrun=9.3, Vx=-1.0 um/s,										Movie=9X.txt, Cells= 54, CWbias=0.17, Vrun=20.4 um/s, STD_Vrun=9.9, Vx=-1.8 um/s,
TotalCells=2121,										TotalCells=2324,										TotalCells=2584,										TotalCells=2293,
CWbias=0.26, Vrun=19.0um/s, STD_Vrun=9.0, Vx=0.2um/s, Vy=-0.2um/s										CWbias=0.27, Vrun=21.4um/s, STD_Vrun=9.5, Vx=0.1um/s, Vy=-0.1um/s										CWbias=0.26, Vrun=20.9um/s, STD_Vrun=9.1, Vx=-0.1um/s, Vy=-0.0um/s										CWbias=0.23, Vrun=17.7um/s, STD_Vrun=8.1, Vx=-0.1um/s, Vy=-0.2um/s
Run duration: fitting exp(t/Tau)=0.13 s, CWbias_LEFT=0.26, CWbias_RIGHT=0.25,										Run duration: fitting exp(t/Tau)=0.13 s, CWbias_LEFT=0.28, CWbias_RIGHT=0.28,										Run duration: fitting exp(t/Tau)=0.13 s, CWbias_LEFT=0.26, CWbias_RIGHT=0.26,										Run duration: fitting exp(t/Tau)=0.14 s, CWbias_LEFT=0.24, CWbias_RIGHT=0.23,
Tumble duration: fitting exp(t/Tau)=0.02 s										Tumble duration: fitting exp(t/Tau)=0.02 s										Tumble duration: fitting exp(t/Tau)=0.02 s										Tumble duration: fitting exp(t/Tau)=0.02 s
MEAN tumble angle_LEFT=73.51, MEAN tumble angle_RIGHT=71.45, Dr=1.29 rad^2/s										MEAN tumble angle_LEFT=76.01, MEAN tumble angle_RIGHT=72.38, Dr=0.84 rad^2/s										MEAN tumble angle_LEFT=75.00, MEAN tumble angle_RIGHT=72.81, Dr=0.86 rad^2/s										MEAN tumble angle_LEFT=76.60, MEAN tumble angle_RIGHT=73.64, Dr=1.32 rad^2/s
1000 µM Glucose
0-3 min										5-8 min										10-13 min										15-18 min
no										incompleteRuns =										incompleteRuns =										incompleteRuns =
Movie=0X.txt, Cells=288, CWbias=0.16, Vrun=21.0 um/s, STD_Vrun=9.1, Vx=0.7 um/s,										no										no										no
Movie=10X.txt, Cells= 44, CWbias=0.31, Vrun=17.5 um/s, STD_Vrun=6.3, Vx=-1.5 um/s,
Movie=11X.txt, Cells= 35, CWbias=0.30, Vrun=18.7 um/s, STD_Vrun=7.5, Vx=-0.3 um/s,										Movie=0X.txt, Cells=315, CWbias=0.10, Vrun=29.9 um/s, STD_Vrun=11.0, Vx=0.0 um/s,										Movie=0X.txt, Cells=418, CWbias=0.06, Vrun=33.5 um/s, STD_Vrun=10.6, Vx=1.2 um/s,										Movie=0X.txt, Cells=363, CWbias=0.12, Vrun=33.2 um/s, STD_Vrun=10.7, Vx=1.0 um/s,
Movie=12X.txt, Cells= 59, CWbias=0.21, Vrun=19.2 um/s, STD_Vrun=6.8, Vx=-0.7 um/s,										Movie=10X.txt, Cells= 90, CWbias=0.21, Vrun=23.7 um/s, STD_Vrun=8.7, Vx=2.1 um/s,										Movie=10X.txt, Cells= 69, CWbias=0.31, Vrun=23.8 um/s, STD_Vrun=8.8, Vx=3.2 um/s,										Movie=10X.txt, Cells= 68, CWbias=0.34, Vrun=27.7 um/s, STD_Vrun=8.9, Vx=0.4 um/s,
Movie=13X.txt, Cells= 73, CWbias=0.32, Vrun=18.8 um/s, STD_Vrun=8.0, Vx=-0.3 um/s,										Movie=11X.txt, Cells= 87, CWbias=0.27, Vrun=23.4 um/s, STD_Vrun=9.4, Vx=-0.5 um/s,										Movie=11X.txt, Cells= 82, CWbias=0.29, Vrun=26.1 um/s, STD_Vrun=10.0, Vx=-0.7 um/s,										Movie=11X.txt, Cells= 72, CWbias=0.36, Vrun=26.5 um/s, STD_Vrun=10.1, Vx=-0.7 um/s,
Movie=14X.txt, Cells= 92, CWbias=0.20, Vrun=20.7 um/s, STD_Vrun=8.4, Vx=0.8 um/s,										Movie=12X.txt, Cells= 57, CWbias=0.29, Vrun=23.1 um/s, STD_Vrun=9.6, Vx=-0.2 um/s,										Movie=12X.txt, Cells= 74, CWbias=0.29, Vrun=24.4 um/s, STD_Vrun=9.8, Vx=-0.8 um/s,										Movie=12X.txt, Cells= 80, CWbias=0.34, Vrun=26.3 um/s, STD_Vrun=11.0, Vx=-1.2 um/s,
Movie=15X.txt, Cells=120, CWbias=0.28, Vrun=19.7 um/s, STD_Vrun=10.4, Vx=-0.1 um/s,										Movie=13X.txt, Cells= 62, CWbias=0.19, Vrun=23.0 um/s, STD_Vrun=8.2, Vx=-0.8 um/s,										Movie=13X.txt, Cells=111, CWbias=0.34, Vrun=26.1 um/s, STD_Vrun=9.6, Vx=-0.7 um/s,										Movie=13X.txt, Cells= 91, CWbias=0.33, Vrun=28.7 um/s, STD_Vrun=11.1, Vx=-0.5 um/s,
Movie=16X.txt, Cells= 75, CWbias=0.23, Vrun=20.4 um/s, STD_Vrun=8.5, Vx=-2.1 um/s,										Movie=14X.txt, Cells= 91, CWbias=0.26, Vrun=24.0 um/s, STD_Vrun=9.4, Vx=0.7 um/s,										Movie=14X.txt, Cells= 70, CWbias=0.42, Vrun=23.3 um/s, STD_Vrun=9.8, Vx=-0.7 um/s,										Movie=14X.txt, Cells= 84, CWbias=0.27, Vrun=27.6 um/s, STD_Vrun=10.2, Vx=-1.2 um/s,
Movie=17X.txt, Cells= 51, CWbias=0.30, Vrun=19.4 um/s, STD_Vrun=9.1, Vx=0.2 um/s,										Movie=15X.txt, Cells=102, CWbias=0.24, Vrun=25.4 um/s, STD_Vrun=9.9, Vx=-0.2 um/s,										Movie=15X.txt, Cells= 64, CWbias=0.34, Vrun=23.0 um/s, STD_Vrun=9.2, Vx=-1.7 um/s,										Movie=15X.txt, Cells= 70, CWbias=0.36, Vrun=27.8 um/s, STD_Vrun=11.4, Vx=-0.1 um/s,
Movie=18X.txt, Cells= 94, CWbias=0.21, Vrun=21.5 um/s, STD_Vrun=9.6, Vx=-1.3 um/s,										Movie=16X.txt, Cells= 89, CWbias=0.26, Vrun=26.6 um/s, STD_Vrun=10.7, Vx=-0.5 um/s,										Movie=16X.txt, Cells=120, CWbias=0.28, Vrun=28.3 um/s, STD_Vrun=12.1, Vx=-0.0 um/s,										Movie=16X.txt, Cells= 48, CWbias=0.28, Vrun=27.9 um/s, STD_Vrun=9.2, Vx=-0.0 um/s,
Movie=19X.txt, Cells= 87, CWbias=0.25, Vrun=22.9 um/s, STD_Vrun=10.7, Vx=0.3 um/s,										Movie=17X.txt, Cells=124, CWbias=0.27, Vrun=26.0 um/s, STD_Vrun=10.9, Vx=0.9 um/s,										Movie=17X.txt, Cells= 89, CWbias=0.37, Vrun=24.9 um/s, STD_Vrun=10.5, Vx=0.7 um/s,										Movie=17X.txt, Cells= 92, CWbias=0.27, Vrun=30.0 um/s, STD_Vrun=11.8, Vx=0.8 um/s,
Movie=1X.txt, Cells=200, CWbias=0.14, Vrun=22.1 um/s, STD_Vrun=8.5, Vx=0.1 um/s,										Movie=18X.txt, Cells=157, CWbias=0.27, Vrun=23.9 um/s, STD_Vrun=9.3, Vx=0.2 um/s,										Movie=18X.txt, Cells=115, CWbias=0.31, Vrun=25.3 um/s, STD_Vrun=9.7, Vx=-0.4 um/s,										Movie=18X.txt, Cells= 57, CWbias=0.27, Vrun=32.4 um/s, STD_Vrun=13.0, Vx=1.3 um/s,
Movie=20X.txt, Cells= 78, CWbias=0.23, Vrun=16.4 um/s, STD_Vrun=6.1, Vx=-0.8 um/s,										Movie=19X.txt, Cells= 94, CWbias=0.31, Vrun=22.0 um/s, STD_Vrun=8.5, Vx=0.6 um/s,										Movie=19X.txt, Cells= 90, CWbias=0.21, Vrun=29.1 um/s, STD_Vrun=12.0, Vx=1.0 um/s,										Movie=19X.txt, Cells=139, CWbias=0.29, Vrun=27.7 um/s, STD_Vrun=10.3, Vx=-0.6 um/s,
Movie=21X.txt, Cells=118, CWbias=0.26, Vrun=18.7 um/s, STD_Vrun=7.4, Vx=0.3 um/s,										Movie=1X.txt, Cells=140, CWbias=0.19, Vrun=26.0 um/s, STD_Vrun=10.2, Vx=0.7 um/s,										Movie=1X.txt, Cells=298, CWbias=0.16, Vrun=29.7 um/s, STD_Vrun=10.4, Vx=-1.0 um/s,										Movie=1X.txt, Cells=184, CWbias=0.19, Vrun=30.9 um/s, STD_Vrun=10.4, Vx=0.2 um/s,
Movie=22X.txt, Cells=100, CWbias=0.28, Vrun=18.5 um/s, STD_Vrun=8.4, Vx=-1.0 um/s,										Movie=20X.txt, Cells= 90, CWbias=0.31, Vrun=21.7 um/s, STD_Vrun=8.5, Vx=-0.0 um/s,										Movie=20X.txt, Cells=129, CWbias=0.20, Vrun=29.8 um/s, STD_Vrun=11.5, Vx=0.7 um/s,										Movie=20X.txt, Cells=132, CWbias=0.33, Vrun=27.3 um/s, STD_Vrun=10.6, Vx=1.3 um/s,
Movie=23X.txt, Cells= 72, CWbias=0.31, Vrun=17.8 um/s, STD_Vrun=7.2, Vx=0.5 um/s,										Movie=21X.txt, Cells=116, CWbias=0.23, Vrun=23.8 um/s, STD_Vrun=8.9, Vx=0.9 um/s,										Movie=21X.txt, Cells= 77, CWbias=0.20, Vrun=32.9 um/s, STD_Vrun=13.0, Vx=-0.5 um/s,										Movie=21X.txt, Cells=100, CWbias=0.33, Vrun=25.6 um/s, STD_Vrun=9.8, Vx=1.0 um/s,
Movie=24X.txt, Cells= 99, CWbias=0.27, Vrun=18.8 um/s, STD_Vrun=7.9, Vx=0.6 um/s,										Movie=22X.txt, Cells=127, CWbias=0.27, Vrun=24.6 um/s, STD_Vrun=11.1, Vx=1.8 um/s,										Movie=22X.txt, Cells=127, CWbias=0.24, Vrun=27.4 um/s, STD_Vrun=10.6, Vx=-1.4 um/s,										Movie=22X.txt, Cells=156, CWbias=0.31, Vrun=26.5 um/s, STD_Vrun=9.9, Vx=-0.2 um/s,
Movie=25X.txt, Cells= 98, CWbias=0.22, Vrun=20.7 um/s, STD_Vrun=9.0, Vx=-0.2 um/s,										Movie=23X.txt, Cells=115, CWbias=0.24, Vrun=24.9 um/s, STD_Vrun=10.0, Vx=0.3 um/s,										Movie=23X.txt, Cells=121, CWbias=0.34, Vrun=25.0 um/s, STD_Vrun=10.1, Vx=1.3 um/s,										Movie=23X.txt, Cells=108, CWbias=0.30, Vrun=27.6 um/s, STD_Vrun=9.9, Vx=-0.3 um/s,
Movie=2X.txt, Cells=210, CWbias=0.23, Vrun=20.0 um/s, STD_Vrun=8.5, Vx=0.5 um/s,										Movie=2X.txt, Cells=212, CWbias=0.25, Vrun=25.5 um/s, STD_Vrun=11.0, Vx=0.2 um/s,										Movie=24X.txt, Cells=117, CWbias=0.21, Vrun=26.1 um/s, STD_Vrun=8.6, Vx=-1.9 um/s,										Movie=24X.txt, Cells=104, CWbias=0.32, Vrun=25.0 um/s, STD_Vrun=9.5, Vx=-2.1 um/s,
Movie=3X.txt, Cells=214, CWbias=0.22, Vrun=20.8 um/s, STD_Vrun=9.3, Vx=1.3 um/s,										Movie=4X.txt, Cells=164, CWbias=0.21, Vrun=25.9 um/s, STD_Vrun=10.5, Vx=1.0 um/s,										Movie=25X.txt, Cells=151, CWbias=0.25, Vrun=25.3 um/s, STD_Vrun=9.2, Vx=0.5 um/s,										Movie=2X.txt, Cells=166, CWbias=0.19, Vrun=31.8 um/s, STD_Vrun=10.1, Vx=1.6 um/s,
Movie=4X.txt, Cells=185, CWbias=0.25, Vrun=20.0 um/s, STD_Vrun=8.9, Vx=-0.6 um/s,										Movie=5X.txt, Cells=183, CWbias=0.27, Vrun=26.2 um/s, STD_Vrun=10.5, Vx=-0.4 um/s,										Movie=26X.txt, Cells=150, CWbias=0.29, Vrun=25.5 um/s, STD_Vrun=9.7, Vx=-0.8 um/s,										Movie=3X.txt, Cells=242, CWbias=0.17, Vrun=31.5 um/s, STD_Vrun=10.4, Vx=-1.0 um/s,
Movie=5X.txt, Cells=136, CWbias=0.18, Vrun=22.2 um/s, STD_Vrun=9.8, Vx=-1.2 um/s,										Movie=6X.txt, Cells=209, CWbias=0.25, Vrun=28.1 um/s, STD_Vrun=12.3, Vx=-1.3 um/s,										Movie=27X.txt, Cells=118, CWbias=0.36, Vrun=25.7 um/s, STD_Vrun=9.9, Vx=-0.6 um/s,										Movie=4X.txt, Cells=227, CWbias=0.19, Vrun=30.6 um/s, STD_Vrun=11.0, Vx=-0.2 um/s,
Movie=6X.txt, Cells=138, CWbias=0.19, Vrun=21.6 um/s, STD_Vrun=9.3, Vx=0.2 um/s,										Movie=7X.txt, Cells= 53, CWbias=0.24, Vrun=22.5 um/s, STD_Vrun=8.2, Vx=2.1 um/s,										Movie=28X.txt, Cells=119, CWbias=0.36, Vrun=24.0 um/s, STD_Vrun=9.3, Vx=0.5 um/s,										Movie=5X.txt, Cells=206, CWbias=0.25, Vrun=30.1 um/s, STD_Vrun=11.0, Vx=-0.3 um/s,
Movie=7X.txt, Cells= 71, CWbias=0.23, Vrun=16.9 um/s, STD_Vrun=5.7, Vx=0.8 um/s,										Movie=8X.txt, Cells= 44, CWbias=0.29, Vrun=22.8 um/s, STD_Vrun=8.7, Vx=-0.3 um/s,										Movie=2X.txt, Cells=202, CWbias=0.20, Vrun=28.3 um/s, STD_Vrun=10.1, Vx=0.5 um/s,										Movie=6X.txt, Cells=125, CWbias=0.10, Vrun=30.0 um/s, STD_Vrun=9.9, Vx=0.3 um/s,
Movie=8X.txt, Cells= 55, CWbias=0.28, Vrun=18.7 um/s, STD_Vrun=8.6, Vx=1.4 um/s,										Movie=9X.txt, Cells= 60, CWbias=0.34, Vrun=22.0 um/s, STD_Vrun=9.0, Vx=1.4 um/s,										Movie=3X.txt, Cells=226, CWbias=0.18, Vrun=30.3 um/s, STD_Vrun=11.5, Vx=-0.7 um/s,										Movie=7X.txt, Cells= 71, CWbias=0.23, Vrun=26.0 um/s, STD_Vrun=8.8, Vx=2.0 um/s,
Movie=9X.txt, Cells= 59, CWbias=0.30, Vrun=17.0 um/s, STD_Vrun=6.4, Vx=0.5 um/s,										TotalCells=2781,										Movie=4X.txt, Cells=251, CWbias=0.20, Vrun=30.2 um/s, STD_Vrun=11.3, Vx=0.1 um/s,										Movie=8X.txt, Cells= 83, CWbias=0.28, Vrun=26.4 um/s, STD_Vrun=9.6, Vx=2.4 um/s,
TotalCells=2851,										CWbias=0.24, Vrun=25.4um/s, STD_Vrun=10.4, Vx=0.3um/s, Vy=0.2um/s										Movie=5X.txt, Cells=194, CWbias=0.18, Vrun=28.9 um/s, STD_Vrun=10.3, Vx=1.2 um/s,										Movie=9X.txt, Cells= 83, CWbias=0.23, Vrun=26.6 um/s, STD_Vrun=9.2, Vx=-1.6 um/s,
CWbias=0.23, Vrun=20.1um/s, STD_Vrun=8.7, Vx=0.1um/s, Vy=-0.2um/s										Run duration: fitting exp(t/Tau)=0.13 s, CWbias_LEFT=0.24, CWbias_RIGHT=0.24,										Movie=6X.txt, Cells=246, CWbias=0.17, Vrun=31.0 um/s, STD_Vrun=11.7, Vx=-0.4 um/s,										TotalCells=3151,
Run duration: fitting exp(t/Tau)=0.12 s, CWbias_LEFT=0.23, CWbias_RIGHT=0.23,										Tumble duration: fitting exp(t/Tau)=0.02 s										Movie=9X.txt, Cells= 52, CWbias=0.39, Vrun=23.6 um/s, STD_Vrun=8.6, Vx=0.7 um/s,										CWbias=0.24, Vrun=29.6um/s, STD_Vrun=10.7, Vx=0.1um/s, Vy=0.1um/s
Tumble duration: fitting exp(t/Tau)=0.02 s										MEAN tumble angle_LEFT=71.18, MEAN tumble angle_RIGHT=67.65, Dr=0.51 rad^2/s										TotalCells=3880,										Run duration: fitting exp(t/Tau)=0.12 s, CWbias_LEFT=0.24, CWbias_RIGHT=0.24,
MEAN tumble angle_LEFT=69.23, MEAN tumble angle_RIGHT=65.73, Dr=0.80 rad^2/s																				CWbias=0.24, Vrun=28.3um/s, STD_Vrun=10.9, Vx=0.0um/s, Vy=-0.1um/s										Tumble duration: fitting exp(t/Tau)=0.02 s
																				Run duration: fitting exp(t/Tau)=0.12 s, CWbias_LEFT=0.24, CWbias_RIGHT=0.23,										MEAN tumble angle_LEFT=70.23, MEAN tumble angle_RIGHT=66.06, Dr=0.34 rad^2/s
																				Tumble duration: fitting exp(t/Tau)=0.02 s
																				MEAN tumble angle_LEFT=67.56, MEAN tumble angle_RIGHT=65.86, Dr=0.39 rad^2/s
1000 µM 2Dg
0-3 min										5-8 min										10-13 min										15-18 min
incompleteRuns =										incompleteRuns =										incompleteRuns =										incompleteRuns =
no										no										no										no
Movie=0X.txt, Cells=208, CWbias=0.14, Vrun=20.0 um/s, STD_Vrun=8.6, Vx=-0.3 um/s,										Movie=0X.txt, Cells=323, CWbias=0.06, Vrun=31.4 um/s, STD_Vrun=10.7, Vx=-1.3 um/s,										Movie=10X.txt, Cells=103, CWbias=0.24, Vrun=22.4 um/s, STD_Vrun=9.0, Vx=0.8 um/s,										Movie=10X.txt, Cells= 83, CWbias=0.27, Vrun=21.9 um/s, STD_Vrun=8.7, Vx=0.4 um/s,
Movie=10X.txt, Cells= 42, CWbias=0.23, Vrun=18.8 um/s, STD_Vrun=7.8, Vx=0.3 um/s,										Movie=10X.txt, Cells= 70, CWbias=0.39, Vrun=20.9 um/s, STD_Vrun=8.0, Vx=-0.8 um/s,										Movie=11X.txt, Cells= 76, CWbias=0.26, Vrun=19.0 um/s, STD_Vrun=7.1, Vx=-0.9 um/s,										Movie=11X.txt, Cells=108, CWbias=0.17, Vrun=22.8 um/s, STD_Vrun=9.1, Vx=0.8 um/s,
Movie=11X.txt, Cells= 81, CWbias=0.31, Vrun=17.4 um/s, STD_Vrun=6.6, Vx=-0.5 um/s,										Movie=11X.txt, Cells= 91, CWbias=0.34, Vrun=22.4 um/s, STD_Vrun=9.6, Vx=0.1 um/s,										Movie=12X.txt, Cells= 62, CWbias=0.24, Vrun=22.6 um/s, STD_Vrun=8.8, Vx=0.4 um/s,										Movie=12X.txt, Cells=109, CWbias=0.23, Vrun=23.3 um/s, STD_Vrun=9.7, Vx=-0.0 um/s,
Movie=12X.txt, Cells= 90, CWbias=0.28, Vrun=19.0 um/s, STD_Vrun=8.2, Vx=0.4 um/s,										Movie=12X.txt, Cells= 87, CWbias=0.37, Vrun=23.3 um/s, STD_Vrun=10.6, Vx=0.1 um/s,										Movie=13X.txt, Cells= 77, CWbias=0.24, Vrun=23.4 um/s, STD_Vrun=10.0, Vx=0.0 um/s,										Movie=13X.txt, Cells= 74, CWbias=0.22, Vrun=21.5 um/s, STD_Vrun=8.8, Vx=-1.7 um/s,
Movie=13X.txt, Cells= 67, CWbias=0.28, Vrun=17.0 um/s, STD_Vrun=6.4, Vx=0.5 um/s,										Movie=13X.txt, Cells= 52, CWbias=0.32, Vrun=20.7 um/s, STD_Vrun=8.2, Vx=0.2 um/s,										Movie=14X.txt, Cells= 62, CWbias=0.18, Vrun=24.7 um/s, STD_Vrun=10.9, Vx=0.7 um/s,										Movie=14X.txt, Cells= 91, CWbias=0.28, Vrun=19.7 um/s, STD_Vrun=7.5, Vx=0.5 um/s,
Movie=15X.txt, Cells= 67, CWbias=0.30, Vrun=17.5 um/s, STD_Vrun=7.4, Vx=-1.3 um/s,										Movie=14X.txt, Cells= 55, CWbias=0.33, Vrun=21.9 um/s, STD_Vrun=9.8, Vx=-0.4 um/s,										Movie=15X.txt, Cells= 97, CWbias=0.19, Vrun=25.6 um/s, STD_Vrun=11.3, Vx=-1.5 um/s,										Movie=15X.txt, Cells= 79, CWbias=0.24, Vrun=24.2 um/s, STD_Vrun=10.8, Vx=0.1 um/s,
Movie=16X.txt, Cells= 57, CWbias=0.23, Vrun=19.6 um/s, STD_Vrun=7.5, Vx=-2.0 um/s,										Movie=15X.txt, Cells= 92, CWbias=0.26, Vrun=24.1 um/s, STD_Vrun=10.0, Vx=-0.4 um/s,										Movie=16X.txt, Cells= 83, CWbias=0.18, Vrun=27.1 um/s, STD_Vrun=11.7, Vx=-0.7 um/s,										Movie=16X.txt, Cells= 67, CWbias=0.15, Vrun=27.1 um/s, STD_Vrun=12.5, Vx=-2.7 um/s,
Movie=17X.txt, Cells= 52, CWbias=0.22, Vrun=19.8 um/s, STD_Vrun=8.6, Vx=0.1 um/s,										Movie=16X.txt, Cells= 66, CWbias=0.32, Vrun=23.9 um/s, STD_Vrun=10.2, Vx=-0.7 um/s,										Movie=17X.txt, Cells= 94, CWbias=0.27, Vrun=25.6 um/s, STD_Vrun=11.6, Vx=-2.2 um/s,										Movie=17X.txt, Cells= 82, CWbias=0.12, Vrun=29.0 um/s, STD_Vrun=12.8, Vx=-0.4 um/s,
Movie=18X.txt, Cells= 28, CWbias=0.26, Vrun=21.0 um/s, STD_Vrun=10.2, Vx=2.5 um/s,										Movie=17X.txt, Cells= 91, CWbias=0.30, Vrun=24.1 um/s, STD_Vrun=10.0, Vx=-1.5 um/s,										Movie=18X.txt, Cells= 82, CWbias=0.16, Vrun=26.8 um/s, STD_Vrun=10.5, Vx=-1.2 um/s,										Movie=18X.txt, Cells= 79, CWbias=0.16, Vrun=27.2 um/s, STD_Vrun=11.1, Vx=2.5 um/s,
Movie=19X.txt, Cells= 90, CWbias=0.21, Vrun=19.6 um/s, STD_Vrun=8.4, Vx=0.5 um/s,										Movie=18X.txt, Cells= 45, CWbias=0.28, Vrun=24.9 um/s, STD_Vrun=10.3, Vx=1.5 um/s,										Movie=19X.txt, Cells=104, CWbias=0.17, Vrun=25.9 um/s, STD_Vrun=11.3, Vx=1.3 um/s,										Movie=19X.txt, Cells=104, CWbias=0.14, Vrun=27.4 um/s, STD_Vrun=11.3, Vx=-1.6 um/s,
Movie=1X.txt, Cells=343, CWbias=0.15, Vrun=21.9 um/s, STD_Vrun=9.6, Vx=-0.8 um/s,										Movie=19X.txt, Cells= 60, CWbias=0.26, Vrun=27.7 um/s, STD_Vrun=12.3, Vx=2.0 um/s,										Movie=1X.txt, Cells=145, CWbias=0.16, Vrun=24.9 um/s, STD_Vrun=9.5, Vx=-0.4 um/s,										Movie=1X.txt, Cells=161, CWbias=0.23, Vrun=20.6 um/s, STD_Vrun=7.9, Vx=0.1 um/s,
Movie=20X.txt, Cells= 67, CWbias=0.27, Vrun=20.2 um/s, STD_Vrun=8.5, Vx=-0.1 um/s,										Movie=1X.txt, Cells=233, CWbias=0.18, Vrun=25.9 um/s, STD_Vrun=9.7, Vx=-0.4 um/s,										Movie=20X.txt, Cells= 79, CWbias=0.31, Vrun=25.3 um/s, STD_Vrun=12.6, Vx=-0.1 um/s,										Movie=20X.txt, Cells= 61, CWbias=0.15, Vrun=24.5 um/s, STD_Vrun=10.7, Vx=2.1 um/s,
Movie=21X.txt, Cells= 68, CWbias=0.20, Vrun=21.5 um/s, STD_Vrun=9.6, Vx=-0.7 um/s,										Movie=20X.txt, Cells= 87, CWbias=0.38, Vrun=21.0 um/s, STD_Vrun=9.0, Vx=1.0 um/s,										Movie=21X.txt, Cells= 78, CWbias=0.31, Vrun=18.8 um/s, STD_Vrun=7.2, Vx=0.3 um/s,										Movie=21X.txt, Cells= 82, CWbias=0.23, Vrun=20.1 um/s, STD_Vrun=7.2, Vx=1.3 um/s,
Movie=22X.txt, Cells= 64, CWbias=0.28, Vrun=16.8 um/s, STD_Vrun=7.1, Vx=-1.4 um/s,										Movie=21X.txt, Cells= 82, CWbias=0.31, Vrun=22.8 um/s, STD_Vrun=9.3, Vx=1.8 um/s,										Movie=22X.txt, Cells= 93, CWbias=0.28, Vrun=19.2 um/s, STD_Vrun=6.8, Vx=0.4 um/s,										Movie=22X.txt, Cells= 82, CWbias=0.27, Vrun=18.6 um/s, STD_Vrun=7.0, Vx=0.1 um/s,
Movie=23X.txt, Cells= 82, CWbias=0.31, Vrun=17.6 um/s, STD_Vrun=7.5, Vx=-1.1 um/s,										Movie=22X.txt, Cells= 87, CWbias=0.26, Vrun=21.8 um/s, STD_Vrun=8.3, Vx=-0.7 um/s,										Movie=23X.txt, Cells=117, CWbias=0.29, Vrun=20.0 um/s, STD_Vrun=7.7, Vx=-0.5 um/s,										Movie=23X.txt, Cells= 70, CWbias=0.26, Vrun=20.0 um/s, STD_Vrun=8.0, Vx=1.0 um/s,
Movie=24X.txt, Cells= 68, CWbias=0.37, Vrun=17.1 um/s, STD_Vrun=7.9, Vx=-0.4 um/s,										Movie=23X.txt, Cells= 72, CWbias=0.34, Vrun=23.0 um/s, STD_Vrun=10.2, Vx=-0.1 um/s,										Movie=24X.txt, Cells= 96, CWbias=0.28, Vrun=19.5 um/s, STD_Vrun=7.4, Vx=0.7 um/s,										Movie=24X.txt, Cells=161, CWbias=0.30, Vrun=19.0 um/s, STD_Vrun=8.4, Vx=0.0 um/s,
Movie=25X.txt, Cells=111, CWbias=0.27, Vrun=19.1 um/s, STD_Vrun=9.1, Vx=0.1 um/s,										Movie=24X.txt, Cells= 61, CWbias=0.39, Vrun=19.9 um/s, STD_Vrun=8.5, Vx=-1.1 um/s,										Movie=25X.txt, Cells= 73, CWbias=0.27, Vrun=19.2 um/s, STD_Vrun=7.4, Vx=1.2 um/s,										Movie=25X.txt, Cells= 79, CWbias=0.32, Vrun=18.0 um/s, STD_Vrun=6.9, Vx=-0.9 um/s,
Movie=26X.txt, Cells= 62, CWbias=0.36, Vrun=17.8 um/s, STD_Vrun=8.6, Vx=0.4 um/s,										Movie=25X.txt, Cells= 92, CWbias=0.35, Vrun=21.3 um/s, STD_Vrun=8.3, Vx=-0.2 um/s,										Movie=26X.txt, Cells=101, CWbias=0.28, Vrun=18.6 um/s, STD_Vrun=6.6, Vx=1.0 um/s,										Movie=26X.txt, Cells=107, CWbias=0.34, Vrun=18.8 um/s, STD_Vrun=7.3, Vx=-0.4 um/s,
Movie=27X.txt, Cells= 86, CWbias=0.25, Vrun=18.9 um/s, STD_Vrun=7.5, Vx=0.1 um/s,										Movie=2X.txt, Cells=196, CWbias=0.29, Vrun=25.1 um/s, STD_Vrun=10.1, Vx=-1.1 um/s,										Movie=2X.txt, Cells=151, CWbias=0.20, Vrun=25.7 um/s, STD_Vrun=11.7, Vx=1.9 um/s,										Movie=2X.txt, Cells=156, CWbias=0.24, Vrun=21.1 um/s, STD_Vrun=7.6, Vx=1.3 um/s,
Movie=2X.txt, Cells=248, CWbias=0.15, Vrun=22.5 um/s, STD_Vrun=9.2, Vx=0.4 um/s,										Movie=3X.txt, Cells=171, CWbias=0.22, Vrun=26.2 um/s, STD_Vrun=10.8, Vx=-0.5 um/s,										Movie=3X.txt, Cells=148, CWbias=0.22, Vrun=22.9 um/s, STD_Vrun=9.0, Vx=-0.6 um/s,										Movie=3X.txt, Cells=207, CWbias=0.19, Vrun=21.1 um/s, STD_Vrun=8.0, Vx=0.3 um/s,
Movie=3X.txt, Cells=162, CWbias=0.17, Vrun=21.1 um/s, STD_Vrun=8.9, Vx=-0.5 um/s,										Movie=4X.txt, Cells=175, CWbias=0.22, Vrun=26.2 um/s, STD_Vrun=10.3, Vx=-0.2 um/s,										Movie=4X.txt, Cells=145, CWbias=0.25, Vrun=20.8 um/s, STD_Vrun=8.2, Vx=0.4 um/s,										Movie=4X.txt, Cells=164, CWbias=0.28, Vrun=20.2 um/s, STD_Vrun=8.0, Vx=0.5 um/s,
Movie=4X.txt, Cells=181, CWbias=0.21, Vrun=20.8 um/s, STD_Vrun=9.2, Vx=0.8 um/s,										Movie=5X.txt, Cells=148, CWbias=0.29, Vrun=26.0 um/s, STD_Vrun=10.2, Vx=0.6 um/s,										Movie=5X.txt, Cells=183, CWbias=0.23, Vrun=20.0 um/s, STD_Vrun=7.6, Vx=-0.8 um/s,										Movie=5X.txt, Cells=192, CWbias=0.22, Vrun=20.9 um/s, STD_Vrun=8.2, Vx=0.8 um/s,
Movie=5X.txt, Cells=143, CWbias=0.24, Vrun=21.7 um/s, STD_Vrun=9.4, Vx=-0.5 um/s,										Movie=6X.txt, Cells=172, CWbias=0.26, Vrun=27.3 um/s, STD_Vrun=11.3, Vx=2.0 um/s,										Movie=6X.txt, Cells=223, CWbias=0.20, Vrun=20.6 um/s, STD_Vrun=8.3, Vx=-1.2 um/s,										Movie=6X.txt, Cells=168, CWbias=0.24, Vrun=20.6 um/s, STD_Vrun=7.5, Vx=0.5 um/s,
Movie=8X.txt, Cells=106, CWbias=0.31, Vrun=15.8 um/s, STD_Vrun=6.4, Vx=1.0 um/s,										Movie=7X.txt, Cells= 63, CWbias=0.44, Vrun=20.5 um/s, STD_Vrun=8.2, Vx=-0.0 um/s,										Movie=7X.txt, Cells=208, CWbias=0.24, Vrun=20.0 um/s, STD_Vrun=7.9, Vx=0.5 um/s,										Movie=7X.txt, Cells=178, CWbias=0.17, Vrun=20.9 um/s, STD_Vrun=7.3, Vx=0.4 um/s,
Movie=9X.txt, Cells= 59, CWbias=0.25, Vrun=18.2 um/s, STD_Vrun=7.8, Vx=-1.8 um/s,										Movie=8X.txt, Cells= 59, CWbias=0.43, Vrun=20.4 um/s, STD_Vrun=9.5, Vx=-0.3 um/s,										Movie=8X.txt, Cells= 75, CWbias=0.31, Vrun=21.9 um/s, STD_Vrun=11.0, Vx=-1.0 um/s,										Movie=8X.txt, Cells= 96, CWbias=0.14, Vrun=24.8 um/s, STD_Vrun=10.1, Vx=0.4 um/s,
TotalCells=2632,										Movie=9X.txt, Cells= 88, CWbias=0.35, Vrun=21.8 um/s, STD_Vrun=9.6, Vx=-1.3 um/s,										Movie=9X.txt, Cells= 55, CWbias=0.23, Vrun=21.4 um/s, STD_Vrun=9.1, Vx=-0.8 um/s,										Movie=9X.txt, Cells=114, CWbias=0.20, Vrun=24.6 um/s, STD_Vrun=9.7, Vx=-0.5 um/s,
CWbias=0.23, Vrun=19.9um/s, STD_Vrun=8.8, Vx=-0.2um/s, Vy=0.1um/s										TotalCells=2818,										TotalCells=2810,										TotalCells=2954,
Run duration: fitting exp(t/Tau)=0.13 s, CWbias_LEFT=0.23, CWbias_RIGHT=0.23,										CWbias=0.28, Vrun=25.1um/s, STD_Vrun=10.5, Vx=-0.2um/s, Vy=0.4um/s										CWbias=0.24, Vrun=22.0um/s, STD_Vrun=9.4, Vx=-0.1um/s, Vy=0.1um/s										CWbias=0.23, Vrun=21.8um/s, STD_Vrun=9.1, Vx=0.3um/s, Vy=-0.0um/s
Tumble duration: fitting exp(t/Tau)=0.02 s										Run duration: fitting exp(t/Tau)=0.11 s, CWbias_LEFT=0.28, CWbias_RIGHT=0.28,										Run duration: fitting exp(t/Tau)=0.14 s, CWbias_LEFT=0.24, CWbias_RIGHT=0.24,										Run duration: fitting exp(t/Tau)=0.14 s, CWbias_LEFT=0.23, CWbias_RIGHT=0.23,
MEAN tumble angle_LEFT=70.68, MEAN tumble angle_RIGHT=69.54, Dr=0.85 rad^2/s										Tumble duration: fitting exp(t/Tau)=0.02 s										Tumble duration: fitting exp(t/Tau)=0.02 s										Tumble duration: fitting exp(t/Tau)=0.02 s
										MEAN tumble angle_LEFT=76.62, MEAN tumble angle_RIGHT=72.01, Dr=0.49 rad^2/s										MEAN tumble angle_LEFT=75.49, MEAN tumble angle_RIGHT=72.83, Dr=0.73 rad^2/s										MEAN tumble angle_LEFT=73.92, MEAN tumble angle_RIGHT=70.81, Dr=0.68 rad^2/s
