# Supplementary material for: Ligand sensing enhances bacterial flagellar motor output via stator recruitment
Source: eLife journal article supplement (doi:10.7554/elife.62848), 2021-04-06
Supplement: supp [file elife-62848-supp-v1.zip › elife_poa_e62848_Figure_4_source_data_1.xlsx]

## Sheet: Fig 4 (A,C,E)
					Membrane potential
				Normalized fluorescence Intensity ratio as a function of time
			Time	Intenisty		Intenisty		Intenisty		Intenisty
			minute	N.A.		N.A.		N.A.		N.A.
				Motility buffer		Glucose		2Dg		CCCP
				Average	Std. error	Average	Std. error	Average	Std. error	Average	Std. error
			5	1	2.49058e-06	1.53426	0.07509	1.04501	0.01176	0.40784	0.0152
			7	1.0008	0.00517	1.67033	0.08171	1.03784	0.01124	0.40946	0.01533
			9	0.99893	0.00241	1.74671	0.0925	1.02597	0.0123	0.37298	0.03595
		Δtrg RP437	11	0.99423	0.00395	1.79434	0.09706	1.01949	0.01061	0.37376	0.03463
			13	0.99032	0.00284	1.80646	0.09549	1.00942	0.01253	0.37416	0.0349
			15	0.99163	0.00288	1.81044	0.08973	1.00214	0.00864	0.37428	0.03504
			17	0.9891	0.00548	1.79944	0.08398	0.99427	0.01001	0.37434	0.03364
			19	0.99131	0.00507	1.78078	0.08128	0.99387	0.01137	0.37467	0.03362
			Time	Intenisty		Intenisty		Intenisty		Intenisty
			minute	N.A.		N.A.		N.A.		N.A.
				Motility buffer		Glucose		2Dg		CCCP
				Average	Std. error	Average	Std. error	Average	Std. error	Average	Std. error
			5	1	8.22388e-09	1.09218	0.00914	0.98422	0.01467	0.50314	0.02064
			7	0.99709	0.00272	1.12345	0.00736	0.98317	0.01642	0.50391	0.02337
			9	0.99391	0.00279	1.13688	0.00618	0.97889	0.01482	0.50135	0.02345
		ΔptsI RP437	11	0.98999	0.00343	1.1389	0.00751	0.97831	0.01404	0.50185	0.02338
			13	0.98601	0.00423	1.14034	0.00884	0.97869	0.01201	0.5034	0.02372
			15	0.98355	0.00251	1.13337	0.00517	0.97568	0.01578	0.50325	0.02429
			17	0.98568	0.0074	1.12794	0.00616	0.97441	0.01135	0.50091	0.02319
			19	0.98462	0.00272	1.12544	0.0058	0.97216	0.00973	0.49795	0.02327
			Time	Intenisty		Intenisty		Intenisty
			minute	N.A.		N.A.		N.A.
				Motility buffer		Glucose		2Dg
				Average	Std. error	Average	Std. error	Average	Std. error
			5	1	6.80412e-11	1.52633	0.09323	1.063	0.01817
			7	1.04062	0.0171	1.59221	0.06279	1.07164	0.02323
			9	1.08468	0.01482	1.81116	0.03482	1.11424	0.01235
		ΔcheY RP437	11	1.09156	0.00862	1.95625	0.04995	1.12386	0.01746
			13	1.08028	0.0084	2.03873	0.05069	1.13236	0.02583
			15	1.08721	0.02155	2.11226	0.06193	1.14513	0.04244
			17	1.10818	0.0136	2.13468	0.05485	1.1452	0.04594
			19	1.10233	0.01816	2.16279	0.06132	1.13359	0.02179

## Sheet: Figure 4(B)_trg mutant
									Δtrg RP437 average run speed
Motility buffer
0-3 min										5-8 min									10-13 min									15-18 min
incompleteRuns =										incompleteRuns =									incompleteRuns =									incompleteRuns =
no										no									no									no
Movie=0X.txt, Cells=121, CWbias=0.27, Vrun=17.7 um/s, STD_Vrun=7.5, Vx=1.1 um/s,										Movie=0X.txt, Cells=123, CWbias=0.23, Vrun=20.3 um/s, STD_Vrun=8.8, Vx=-0.6 um/s,									Movie=0X.txt, Cells=154, CWbias=0.16, Vrun=21.7 um/s, STD_Vrun=9.4, Vx=-1.0 um/s,									Movie=0X.txt, Cells=182, CWbias=0.20, Vrun=18.0 um/s, STD_Vrun=8.1, Vx=0.5 um/s,
Movie=10X.txt, Cells=202, CWbias=0.30, Vrun=17.8 um/s, STD_Vrun=7.7, Vx=0.1 um/s,										Movie=10X.txt, Cells=234, CWbias=0.31, Vrun=17.5 um/s, STD_Vrun=7.6, Vx=-0.3 um/s,									Movie=10X.txt, Cells=199, CWbias=0.32, Vrun=16.0 um/s, STD_Vrun=8.2, Vx=0.6 um/s,									Movie=10X.txt, Cells=193, CWbias=0.29, Vrun=14.6 um/s, STD_Vrun=7.1, Vx=0.4 um/s,
Movie=11X.txt, Cells=206, CWbias=0.31, Vrun=18.6 um/s, STD_Vrun=9.4, Vx=-0.4 um/s,										Movie=11X.txt, Cells=215, CWbias=0.33, Vrun=16.3 um/s, STD_Vrun=7.7, Vx=0.1 um/s,									Movie=11X.txt, Cells=175, CWbias=0.31, Vrun=15.6 um/s, STD_Vrun=7.6, Vx=0.0 um/s,									Movie=11X.txt, Cells=213, CWbias=0.30, Vrun=15.2 um/s, STD_Vrun=8.5, Vx=0.1 um/s,
Movie=12X.txt, Cells=213, CWbias=0.26, Vrun=19.2 um/s, STD_Vrun=9.1, Vx=-0.0 um/s,										Movie=12X.txt, Cells=222, CWbias=0.34, Vrun=16.0 um/s, STD_Vrun=7.4, Vx=-0.8 um/s,									Movie=12X.txt, Cells=182, CWbias=0.38, Vrun=15.3 um/s, STD_Vrun=8.0, Vx=-0.6 um/s,									Movie=12X.txt, Cells=153, CWbias=0.33, Vrun=14.8 um/s, STD_Vrun=8.2, Vx=0.6 um/s,
Movie=13X.txt, Cells=147, CWbias=0.28, Vrun=20.5 um/s, STD_Vrun=9.0, Vx=0.3 um/s,										Movie=13X.txt, Cells=119, CWbias=0.33, Vrun=20.1 um/s, STD_Vrun=9.2, Vx=-0.3 um/s,									Movie=13X.txt, Cells=121, CWbias=0.21, Vrun=19.6 um/s, STD_Vrun=8.1, Vx=-0.0 um/s,									Movie=13X.txt, Cells=127, CWbias=0.23, Vrun=17.3 um/s, STD_Vrun=7.5, Vx=0.3 um/s,
Movie=14X.txt, Cells=184, CWbias=0.29, Vrun=19.6 um/s, STD_Vrun=9.1, Vx=-0.1 um/s,										Movie=14X.txt, Cells=127, CWbias=0.29, Vrun=20.0 um/s, STD_Vrun=8.5, Vx=-0.3 um/s,									Movie=14X.txt, Cells=150, CWbias=0.21, Vrun=17.6 um/s, STD_Vrun=7.1, Vx=0.5 um/s,									Movie=14X.txt, Cells=110, CWbias=0.25, Vrun=17.0 um/s, STD_Vrun=7.0, Vx=-0.7 um/s,
Movie=15X.txt, Cells=171, CWbias=0.27, Vrun=20.4 um/s, STD_Vrun=9.4, Vx=0.6 um/s,										Movie=15X.txt, Cells=126, CWbias=0.20, Vrun=21.4 um/s, STD_Vrun=8.8, Vx=-0.0 um/s,									Movie=15X.txt, Cells=107, CWbias=0.24, Vrun=17.0 um/s, STD_Vrun=7.2, Vx=-0.3 um/s,									Movie=15X.txt, Cells=114, CWbias=0.27, Vrun=16.2 um/s, STD_Vrun=7.0, Vx=-0.4 um/s,
Movie=1X.txt, Cells=116, CWbias=0.24, Vrun=19.1 um/s, STD_Vrun=7.9, Vx=-0.6 um/s,										Movie=1X.txt, Cells=129, CWbias=0.25, Vrun=21.4 um/s, STD_Vrun=10.0, Vx=0.4 um/s,									Movie=1X.txt, Cells=191, CWbias=0.18, Vrun=20.3 um/s, STD_Vrun=8.7, Vx=-0.2 um/s,									Movie=1X.txt, Cells=137, CWbias=0.18, Vrun=18.1 um/s, STD_Vrun=7.0, Vx=0.5 um/s,
Movie=20X.txt, Cells=113, CWbias=0.32, Vrun=17.3 um/s, STD_Vrun=7.5, Vx=0.7 um/s,										Movie=20X.txt, Cells=108, CWbias=0.24, Vrun=20.2 um/s, STD_Vrun=8.3, Vx=-0.9 um/s,									Movie=20X.txt, Cells=167, CWbias=0.24, Vrun=19.7 um/s, STD_Vrun=8.6, Vx=0.2 um/s,									Movie=20X.txt, Cells= 96, CWbias=0.21, Vrun=16.2 um/s, STD_Vrun=7.0, Vx=-0.2 um/s,
Movie=21X.txt, Cells=104, CWbias=0.35, Vrun=18.0 um/s, STD_Vrun=8.2, Vx=-0.6 um/s,										Movie=21X.txt, Cells=149, CWbias=0.29, Vrun=20.4 um/s, STD_Vrun=8.9, Vx=-0.9 um/s,									Movie=21X.txt, Cells=116, CWbias=0.26, Vrun=19.4 um/s, STD_Vrun=9.0, Vx=0.4 um/s,									Movie=21X.txt, Cells=103, CWbias=0.24, Vrun=17.0 um/s, STD_Vrun=7.4, Vx=-0.5 um/s,
Movie=22X.txt, Cells=150, CWbias=0.29, Vrun=18.3 um/s, STD_Vrun=8.0, Vx=-1.0 um/s,										Movie=22X.txt, Cells=110, CWbias=0.27, Vrun=20.9 um/s, STD_Vrun=9.5, Vx=-1.0 um/s,									Movie=22X.txt, Cells=116, CWbias=0.23, Vrun=19.0 um/s, STD_Vrun=8.2, Vx=-0.3 um/s,									Movie=22X.txt, Cells=112, CWbias=0.18, Vrun=17.7 um/s, STD_Vrun=7.2, Vx=-0.7 um/s,
Movie=2X.txt, Cells=113, CWbias=0.31, Vrun=19.3 um/s, STD_Vrun=8.8, Vx=-0.6 um/s,										Movie=2X.txt, Cells=141, CWbias=0.23, Vrun=22.4 um/s, STD_Vrun=9.3, Vx=-0.9 um/s,									Movie=2X.txt, Cells=145, CWbias=0.24, Vrun=18.7 um/s, STD_Vrun=7.7, Vx=-0.4 um/s,									Movie=2X.txt, Cells=116, CWbias=0.18, Vrun=17.4 um/s, STD_Vrun=7.5, Vx=0.4 um/s,
Movie=30X.txt, Cells=208, CWbias=0.21, Vrun=18.5 um/s, STD_Vrun=7.5, Vx=-0.3 um/s,										Movie=30X.txt, Cells=148, CWbias=0.27, Vrun=19.4 um/s, STD_Vrun=8.7, Vx=0.3 um/s,									Movie=30X.txt, Cells=176, CWbias=0.21, Vrun=18.1 um/s, STD_Vrun=7.6, Vx=-0.1 um/s,									Movie=30X.txt, Cells=170, CWbias=0.26, Vrun=17.6 um/s, STD_Vrun=7.4, Vx=-0.7 um/s,
Movie=31X.txt, Cells=176, CWbias=0.33, Vrun=18.2 um/s, STD_Vrun=9.1, Vx=0.3 um/s,										Movie=31X.txt, Cells=178, CWbias=0.29, Vrun=19.5 um/s, STD_Vrun=8.4, Vx=0.7 um/s,									Movie=31X.txt, Cells=159, CWbias=0.22, Vrun=17.8 um/s, STD_Vrun=7.3, Vx=0.9 um/s,									Movie=31X.txt, Cells=170, CWbias=0.15, Vrun=18.3 um/s, STD_Vrun=7.6, Vx=-1.9 um/s,
Movie=32X.txt, Cells=134, CWbias=0.30, Vrun=18.5 um/s, STD_Vrun=9.2, Vx=1.4 um/s,										Movie=32X.txt, Cells=227, CWbias=0.25, Vrun=20.4 um/s, STD_Vrun=9.3, Vx=1.1 um/s,									Movie=32X.txt, Cells=145, CWbias=0.21, Vrun=17.9 um/s, STD_Vrun=8.2, Vx=0.6 um/s,									Movie=32X.txt, Cells=205, CWbias=0.19, Vrun=17.5 um/s, STD_Vrun=7.2, Vx=-0.9 um/s,
Movie=33X.txt, Cells=169, CWbias=0.28, Vrun=19.3 um/s, STD_Vrun=8.5, Vx=1.3 um/s,										Movie=33X.txt, Cells=163, CWbias=0.28, Vrun=20.0 um/s, STD_Vrun=9.4, Vx=-0.1 um/s,									Movie=33X.txt, Cells=172, CWbias=0.21, Vrun=17.6 um/s, STD_Vrun=7.5, Vx=0.5 um/s,									Movie=33X.txt, Cells=216, CWbias=0.19, Vrun=17.6 um/s, STD_Vrun=7.8, Vx=0.0 um/s,
Movie=34X.txt, Cells=132, CWbias=0.33, Vrun=18.6 um/s, STD_Vrun=9.9, Vx=-0.1 um/s,										Movie=34X.txt, Cells=203, CWbias=0.28, Vrun=21.2 um/s, STD_Vrun=9.7, Vx=0.4 um/s,									Movie=34X.txt, Cells=182, CWbias=0.25, Vrun=18.6 um/s, STD_Vrun=8.2, Vx=0.9 um/s,									Movie=34X.txt, Cells=206, CWbias=0.21, Vrun=17.4 um/s, STD_Vrun=8.0, Vx=1.3 um/s,
Movie=35X.txt, Cells=173, CWbias=0.27, Vrun=19.9 um/s, STD_Vrun=9.5, Vx=0.2 um/s,										Movie=35X.txt, Cells=151, CWbias=0.23, Vrun=20.3 um/s, STD_Vrun=8.0, Vx=0.7 um/s,									Movie=35X.txt, Cells=199, CWbias=0.25, Vrun=18.8 um/s, STD_Vrun=9.2, Vx=-0.0 um/s,									Movie=35X.txt, Cells=156, CWbias=0.20, Vrun=18.6 um/s, STD_Vrun=7.7, Vx=-0.4 um/s,
Movie=3X.txt, Cells=163, CWbias=0.17, Vrun=21.1 um/s, STD_Vrun=9.4, Vx=0.9 um/s,										Movie=3X.txt, Cells=178, CWbias=0.18, Vrun=22.9 um/s, STD_Vrun=9.9, Vx=0.9 um/s,									Movie=3X.txt, Cells=204, CWbias=0.18, Vrun=18.7 um/s, STD_Vrun=7.3, Vx=-1.1 um/s,									Movie=3X.txt, Cells=126, CWbias=0.14, Vrun=17.9 um/s, STD_Vrun=6.6, Vx=0.1 um/s,
Movie=4X.txt, Cells=151, CWbias=0.18, Vrun=21.9 um/s, STD_Vrun=9.2, Vx=-0.6 um/s,										Movie=4X.txt, Cells=168, CWbias=0.24, Vrun=20.9 um/s, STD_Vrun=9.1, Vx=0.1 um/s,									Movie=4X.txt, Cells=168, CWbias=0.18, Vrun=18.6 um/s, STD_Vrun=6.9, Vx=0.7 um/s,									Movie=4X.txt, Cells=164, CWbias=0.20, Vrun=17.0 um/s, STD_Vrun=6.9, Vx=-0.3 um/s,
Movie=6X.txt, Cells=125, CWbias=0.20, Vrun=21.2 um/s, STD_Vrun=9.2, Vx=0.5 um/s,										Movie=5X.txt, Cells=172, CWbias=0.29, Vrun=20.3 um/s, STD_Vrun=9.4, Vx=0.7 um/s,									Movie=5X.txt, Cells=185, CWbias=0.18, Vrun=18.1 um/s, STD_Vrun=7.2, Vx=0.4 um/s,									Movie=5X.txt, Cells=223, CWbias=0.20, Vrun=17.3 um/s, STD_Vrun=7.7, Vx=-0.7 um/s,
Movie=7X.txt, Cells=186, CWbias=0.33, Vrun=18.3 um/s, STD_Vrun=8.6, Vx=-0.5 um/s,										Movie=7X.txt, Cells=199, CWbias=0.33, Vrun=18.7 um/s, STD_Vrun=9.3, Vx=0.3 um/s,									Movie=7X.txt, Cells=159, CWbias=0.29, Vrun=15.8 um/s, STD_Vrun=7.8, Vx=-0.4 um/s,									Movie=7X.txt, Cells=169, CWbias=0.28, Vrun=15.2 um/s, STD_Vrun=7.7, Vx=-0.3 um/s,
Movie=8X.txt, Cells=192, CWbias=0.34, Vrun=17.2 um/s, STD_Vrun=8.1, Vx=-0.1 um/s,										Movie=8X.txt, Cells=184, CWbias=0.36, Vrun=17.8 um/s, STD_Vrun=7.4, Vx=0.2 um/s,									Movie=8X.txt, Cells=165, CWbias=0.32, Vrun=16.2 um/s, STD_Vrun=8.3, Vx=0.1 um/s,									Movie=8X.txt, Cells=203, CWbias=0.31, Vrun=14.9 um/s, STD_Vrun=7.1, Vx=0.0 um/s,
Movie=9X.txt, Cells=138, CWbias=0.38, Vrun=17.4 um/s, STD_Vrun=8.4, Vx=1.3 um/s,										Movie=9X.txt, Cells=134, CWbias=0.40, Vrun=17.6 um/s, STD_Vrun=8.8, Vx=-0.3 um/s,									Movie=9X.txt, Cells=207, CWbias=0.35, Vrun=15.7 um/s, STD_Vrun=7.9, Vx=-0.5 um/s,									Movie=9X.txt, Cells=161, CWbias=0.30, Vrun=14.8 um/s, STD_Vrun=7.4, Vx=-0.2 um/s,
TotalCells=3787,										TotalCells=3908,									TotalCells=3944,									TotalCells=3825,
CWbias=0.29, Vrun=19.0um/s, STD_Vrun=8.8, Vx=0.1um/s, Vy=0.0um/s										CWbias=0.28, Vrun=19.7um/s, STD_Vrun=9.0, Vx=0.0um/s, Vy=-0.0um/s									CWbias=0.25, Vrun=17.9um/s, STD_Vrun=8.1, Vx=0.0um/s, Vy=-0.3um/s									CWbias=0.23, Vrun=16.8um/s, STD_Vrun=7.6, Vx=-0.1um/s, Vy=-0.0um/s
Run duration: fitting exp(t/Tau)=0.13 s, CWbias_LEFT=0.29, CWbias_RIGHT=0.29,										Run duration: fitting exp(t/Tau)=0.13 s, CWbias_LEFT=0.28, CWbias_RIGHT=0.28,									Run duration: fitting exp(t/Tau)=0.13 s, CWbias_LEFT=0.25, CWbias_RIGHT=0.25,									Run duration: fitting exp(t/Tau)=0.14 s, CWbias_LEFT=0.23, CWbias_RIGHT=0.24,
Tumble duration: fitting exp(t/Tau)=0.02 s										Tumble duration: fitting exp(t/Tau)=0.02 s									Tumble duration: fitting exp(t/Tau)=0.02 s									Tumble duration: fitting exp(t/Tau)=0.02 s
MEAN tumble angle_LEFT=75.61, MEAN tumble angle_RIGHT=73.55, Dr=1.23 rad^2/s										MEAN tumble angle_LEFT=75.00, MEAN tumble angle_RIGHT=72.88, Dr=1.08 rad^2/s									MEAN tumble angle_LEFT=74.62, MEAN tumble angle_RIGHT=73.31, Dr=1.34 rad^2/s									MEAN tumble angle_LEFT=75.02, MEAN tumble angle_RIGHT=73.63, Dr=1.54 rad^2/s
1000 µM Glucose
0-3 min										5-8 min									10-13 min									15-18 min
incompleteRuns =										incompleteRuns =									incompleteRuns =									incompleteRuns =
no										no									no									no
Movie=0X.txt, Cells=237, CWbias=0.25, Vrun=18.7 um/s, STD_Vrun=8.8, Vx=1.3 um/s,										Movie=0X.txt, Cells=136, CWbias=0.24, Vrun=21.4 um/s, STD_Vrun=8.9, Vx=-0.0 um/s,									Movie=0X.txt, Cells=266, CWbias=0.17, Vrun=26.1 um/s, STD_Vrun=9.6, Vx=0.4 um/s,									Movie=0X.txt, Cells=438, CWbias=0.08, Vrun=31.3 um/s, STD_Vrun=10.3, Vx=0.2 um/s,
Movie=10X.txt, Cells=216, CWbias=0.26, Vrun=18.8 um/s, STD_Vrun=8.2, Vx=-0.1 um/s,										Movie=10X.txt, Cells=232, CWbias=0.32, Vrun=20.1 um/s, STD_Vrun=9.2, Vx=-0.5 um/s,									Movie=10X.txt, Cells=273, CWbias=0.40, Vrun=23.3 um/s, STD_Vrun=10.4, Vx=-1.0 um/s,									Movie=10X.txt, Cells=243, CWbias=0.40, Vrun=24.8 um/s, STD_Vrun=10.2, Vx=-0.3 um/s,
Movie=11X.txt, Cells=290, CWbias=0.24, Vrun=19.7 um/s, STD_Vrun=8.9, Vx=0.2 um/s,										Movie=11X.txt, Cells=224, CWbias=0.25, Vrun=23.0 um/s, STD_Vrun=9.7, Vx=-0.9 um/s,									Movie=11X.txt, Cells=302, CWbias=0.33, Vrun=23.2 um/s, STD_Vrun=10.5, Vx=0.8 um/s,									Movie=11X.txt, Cells=276, CWbias=0.33, Vrun=25.1 um/s, STD_Vrun=9.9, Vx=0.1 um/s,
Movie=12X.txt, Cells=205, CWbias=0.24, Vrun=19.5 um/s, STD_Vrun=8.6, Vx=-0.3 um/s,										Movie=13X.txt, Cells=145, CWbias=0.33, Vrun=20.8 um/s, STD_Vrun=9.1, Vx=0.6 um/s,									Movie=13X.txt, Cells=169, CWbias=0.30, Vrun=24.1 um/s, STD_Vrun=9.7, Vx=0.4 um/s,									Movie=14X.txt, Cells=203, CWbias=0.29, Vrun=27.3 um/s, STD_Vrun=10.8, Vx=0.1 um/s,
Movie=13X.txt, Cells= 75, CWbias=0.30, Vrun=17.4 um/s, STD_Vrun=7.6, Vx=-1.2 um/s,										Movie=14X.txt, Cells=141, CWbias=0.24, Vrun=23.0 um/s, STD_Vrun=10.3, Vx=-0.3 um/s,									Movie=14X.txt, Cells=143, CWbias=0.30, Vrun=23.5 um/s, STD_Vrun=9.4, Vx=0.1 um/s,									Movie=15X.txt, Cells=178, CWbias=0.23, Vrun=26.4 um/s, STD_Vrun=9.3, Vx=-0.5 um/s,
Movie=14X.txt, Cells= 86, CWbias=0.34, Vrun=17.3 um/s, STD_Vrun=8.2, Vx=-0.5 um/s,										Movie=15X.txt, Cells=118, CWbias=0.31, Vrun=20.5 um/s, STD_Vrun=8.5, Vx=-0.3 um/s,									Movie=15X.txt, Cells=150, CWbias=0.32, Vrun=23.5 um/s, STD_Vrun=9.9, Vx=0.1 um/s,									Movie=1X.txt, Cells=439, CWbias=0.11, Vrun=30.3 um/s, STD_Vrun=9.8, Vx=-0.7 um/s,
Movie=15X.txt, Cells=112, CWbias=0.29, Vrun=19.0 um/s, STD_Vrun=8.4, Vx=-0.5 um/s,										Movie=1X.txt, Cells=136, CWbias=0.21, Vrun=22.0 um/s, STD_Vrun=9.8, Vx=-0.9 um/s,									Movie=1X.txt, Cells=211, CWbias=0.21, Vrun=26.7 um/s, STD_Vrun=9.9, Vx=-0.5 um/s,									Movie=20X.txt, Cells=269, CWbias=0.24, Vrun=27.0 um/s, STD_Vrun=10.4, Vx=-0.7 um/s,
Movie=1X.txt, Cells=146, CWbias=0.19, Vrun=17.7 um/s, STD_Vrun=6.6, Vx=0.4 um/s,										Movie=20X.txt, Cells=137, CWbias=0.33, Vrun=20.3 um/s, STD_Vrun=8.4, Vx=0.9 um/s,									Movie=20X.txt, Cells=174, CWbias=0.29, Vrun=24.4 um/s, STD_Vrun=10.3, Vx=0.7 um/s,									Movie=21X.txt, Cells=148, CWbias=0.35, Vrun=26.0 um/s, STD_Vrun=10.7, Vx=-0.7 um/s,
Movie=20X.txt, Cells=123, CWbias=0.25, Vrun=19.0 um/s, STD_Vrun=8.2, Vx=-0.8 um/s,										Movie=21X.txt, Cells=123, CWbias=0.28, Vrun=22.2 um/s, STD_Vrun=9.7, Vx=1.1 um/s,									Movie=21X.txt, Cells=180, CWbias=0.34, Vrun=24.4 um/s, STD_Vrun=10.4, Vx=0.4 um/s,									Movie=22X.txt, Cells=175, CWbias=0.24, Vrun=26.0 um/s, STD_Vrun=8.8, Vx=0.2 um/s,
Movie=21X.txt, Cells= 85, CWbias=0.26, Vrun=17.7 um/s, STD_Vrun=7.3, Vx=1.0 um/s,										Movie=22X.txt, Cells=125, CWbias=0.32, Vrun=21.5 um/s, STD_Vrun=8.9, Vx=0.4 um/s,									Movie=22X.txt, Cells=140, CWbias=0.33, Vrun=23.2 um/s, STD_Vrun=9.6, Vx=0.1 um/s,									Movie=23X.txt, Cells=177, CWbias=0.20, Vrun=27.1 um/s, STD_Vrun=9.0, Vx=-0.6 um/s,
Movie=22X.txt, Cells=121, CWbias=0.31, Vrun=17.2 um/s, STD_Vrun=7.6, Vx=0.2 um/s,										Movie=2X.txt, Cells=168, CWbias=0.27, Vrun=21.5 um/s, STD_Vrun=8.6, Vx=0.1 um/s,									Movie=2X.txt, Cells=262, CWbias=0.19, Vrun=28.3 um/s, STD_Vrun=10.3, Vx=1.5 um/s,									Movie=2X.txt, Cells=310, CWbias=0.12, Vrun=29.2 um/s, STD_Vrun=9.8, Vx=-1.0 um/s,
Movie=2X.txt, Cells=208, CWbias=0.33, Vrun=18.1 um/s, STD_Vrun=9.1, Vx=-0.2 um/s,										Movie=30X.txt, Cells=181, CWbias=0.32, Vrun=20.8 um/s, STD_Vrun=10.1, Vx=-0.4 um/s,									Movie=30X.txt, Cells=246, CWbias=0.29, Vrun=24.4 um/s, STD_Vrun=10.4, Vx=-1.1 um/s,									Movie=30X.txt, Cells=384, CWbias=0.16, Vrun=29.6 um/s, STD_Vrun=9.6, Vx=1.0 um/s,
Movie=30X.txt, Cells=194, CWbias=0.23, Vrun=18.8 um/s, STD_Vrun=8.8, Vx=-0.4 um/s,										Movie=31X.txt, Cells=187, CWbias=0.29, Vrun=22.4 um/s, STD_Vrun=10.4, Vx=-0.1 um/s,									Movie=31X.txt, Cells=157, CWbias=0.24, Vrun=24.3 um/s, STD_Vrun=10.5, Vx=2.1 um/s,									Movie=32X.txt, Cells=304, CWbias=0.22, Vrun=27.4 um/s, STD_Vrun=10.3, Vx=0.0 um/s,
Movie=31X.txt, Cells=152, CWbias=0.33, Vrun=17.4 um/s, STD_Vrun=9.1, Vx=-0.8 um/s,										Movie=32X.txt, Cells=197, CWbias=0.30, Vrun=21.5 um/s, STD_Vrun=10.1, Vx=-0.6 um/s,									Movie=32X.txt, Cells=222, CWbias=0.32, Vrun=25.5 um/s, STD_Vrun=11.1, Vx=0.7 um/s,									Movie=33X.txt, Cells=319, CWbias=0.28, Vrun=26.7 um/s, STD_Vrun=10.1, Vx=-0.1 um/s,
Movie=32X.txt, Cells=171, CWbias=0.26, Vrun=18.5 um/s, STD_Vrun=8.7, Vx=0.5 um/s,										Movie=33X.txt, Cells=174, CWbias=0.28, Vrun=21.5 um/s, STD_Vrun=9.1, Vx=0.8 um/s,									Movie=33X.txt, Cells=194, CWbias=0.29, Vrun=24.6 um/s, STD_Vrun=10.4, Vx=0.0 um/s,									Movie=34X.txt, Cells=255, CWbias=0.22, Vrun=26.9 um/s, STD_Vrun=9.6, Vx=0.1 um/s,
Movie=33X.txt, Cells=176, CWbias=0.28, Vrun=18.8 um/s, STD_Vrun=8.9, Vx=0.0 um/s,										Movie=34X.txt, Cells=133, CWbias=0.21, Vrun=24.6 um/s, STD_Vrun=10.6, Vx=-1.1 um/s,									Movie=34X.txt, Cells=266, CWbias=0.24, Vrun=26.4 um/s, STD_Vrun=11.1, Vx=-0.4 um/s,									Movie=35X.txt, Cells=250, CWbias=0.24, Vrun=26.9 um/s, STD_Vrun=9.6, Vx=-0.8 um/s,
Movie=34X.txt, Cells=143, CWbias=0.31, Vrun=18.9 um/s, STD_Vrun=9.3, Vx=-0.9 um/s,										Movie=35X.txt, Cells=147, CWbias=0.27, Vrun=22.2 um/s, STD_Vrun=10.3, Vx=-0.4 um/s,									Movie=35X.txt, Cells=254, CWbias=0.29, Vrun=25.2 um/s, STD_Vrun=10.4, Vx=0.8 um/s,									Movie=4X.txt, Cells=246, CWbias=0.15, Vrun=29.8 um/s, STD_Vrun=8.9, Vx=0.5 um/s,
Movie=35X.txt, Cells=157, CWbias=0.27, Vrun=20.1 um/s, STD_Vrun=9.4, Vx=-0.7 um/s,										Movie=3X.txt, Cells=138, CWbias=0.23, Vrun=22.0 um/s, STD_Vrun=8.7, Vx=1.4 um/s,									Movie=3X.txt, Cells=171, CWbias=0.14, Vrun=27.7 um/s, STD_Vrun=9.3, Vx=-1.5 um/s,									Movie=5X.txt, Cells=228, CWbias=0.20, Vrun=27.8 um/s, STD_Vrun=9.0, Vx=0.4 um/s,
Movie=3X.txt, Cells=123, CWbias=0.25, Vrun=17.7 um/s, STD_Vrun=7.0, Vx=1.1 um/s,										Movie=4X.txt, Cells=145, CWbias=0.23, Vrun=22.2 um/s, STD_Vrun=9.1, Vx=1.1 um/s,									Movie=4X.txt, Cells=199, CWbias=0.22, Vrun=27.0 um/s, STD_Vrun=9.6, Vx=-0.4 um/s,									Movie=6X.txt, Cells=329, CWbias=0.17, Vrun=28.3 um/s, STD_Vrun=10.1, Vx=-0.1 um/s,
Movie=4X.txt, Cells=118, CWbias=0.30, Vrun=18.0 um/s, STD_Vrun=7.9, Vx=-0.3 um/s,										Movie=5X.txt, Cells=218, CWbias=0.21, Vrun=23.4 um/s, STD_Vrun=9.5, Vx=0.3 um/s,									Movie=5X.txt, Cells=234, CWbias=0.23, Vrun=26.9 um/s, STD_Vrun=9.9, Vx=-0.1 um/s,									Movie=7X.txt, Cells=268, CWbias=0.31, Vrun=25.7 um/s, STD_Vrun=10.0, Vx=1.1 um/s,
Movie=5X.txt, Cells=130, CWbias=0.26, Vrun=19.1 um/s, STD_Vrun=8.4, Vx=0.4 um/s,										Movie=6X.txt, Cells=391, CWbias=0.18, Vrun=23.1 um/s, STD_Vrun=9.2, Vx=-1.2 um/s,									Movie=6X.txt, Cells=302, CWbias=0.35, Vrun=22.6 um/s, STD_Vrun=10.2, Vx=0.6 um/s,									Movie=8X.txt, Cells=268, CWbias=0.32, Vrun=25.1 um/s, STD_Vrun=10.0, Vx=-0.0 um/s,
Movie=7X.txt, Cells=488, CWbias=0.14, Vrun=20.9 um/s, STD_Vrun=9.4, Vx=0.4 um/s,										Movie=7X.txt, Cells=256, CWbias=0.33, Vrun=20.0 um/s, STD_Vrun=9.6, Vx=-0.4 um/s,									Movie=7X.txt, Cells=252, CWbias=0.32, Vrun=23.1 um/s, STD_Vrun=9.5, Vx=0.5 um/s,									Movie=9X.txt, Cells=241, CWbias=0.30, Vrun=25.1 um/s, STD_Vrun=9.8, Vx=0.6 um/s,
Movie=8X.txt, Cells=312, CWbias=0.22, Vrun=19.9 um/s, STD_Vrun=9.5, Vx=0.7 um/s,										Movie=8X.txt, Cells=225, CWbias=0.31, Vrun=21.1 um/s, STD_Vrun=9.9, Vx=-0.0 um/s,									Movie=8X.txt, Cells=279, CWbias=0.34, Vrun=22.8 um/s, STD_Vrun=9.8, Vx=0.5 um/s,									TotalCells=5948,
Movie=9X.txt, Cells=193, CWbias=0.28, Vrun=18.2 um/s, STD_Vrun=8.7, Vx=1.0 um/s,										Movie=9X.txt, Cells=262, CWbias=0.33, Vrun=20.8 um/s, STD_Vrun=9.6, Vx=0.1 um/s,									Movie=9X.txt, Cells=332, CWbias=0.38, Vrun=22.6 um/s, STD_Vrun=10.0, Vx=-0.4 um/s,									CWbias=0.22, Vrun=27.8um/s, STD_Vrun=10.0, Vx=-0.0um/s, Vy=0.1um/s
TotalCells=4261,										TotalCells=4339,									TotalCells=5378,									Run duration: fitting exp(t/Tau)=0.11 s, CWbias_LEFT=0.22, CWbias_RIGHT=0.22,
CWbias=0.25, Vrun=18.9um/s, STD_Vrun=8.7, Vx=0.1um/s, Vy=-0.1um/s										CWbias=0.27, Vrun=21.8um/s, STD_Vrun=9.5, Vx=-0.1um/s, Vy=0.1um/s									CWbias=0.29, Vrun=24.9um/s, STD_Vrun=10.3, Vx=0.1um/s, Vy=0.0um/s									Tumble duration: fitting exp(t/Tau)=0.02 s
Run duration: fitting exp(t/Tau)=0.12 s, CWbias_LEFT=0.26, CWbias_RIGHT=0.25,										Run duration: fitting exp(t/Tau)=0.12 s, CWbias_LEFT=0.27, CWbias_RIGHT=0.28,									Run duration: fitting exp(t/Tau)=0.11 s, CWbias_LEFT=0.29, CWbias_RIGHT=0.29,									MEAN tumble angle_LEFT=65.19, MEAN tumble angle_RIGHT=61.96, Dr=0.33 rad^2/s
Tumble duration: fitting exp(t/Tau)=0.02 s										Tumble duration: fitting exp(t/Tau)=0.02 s									Tumble duration: fitting exp(t/Tau)=0.02 s
MEAN tumble angle_LEFT=71.57, MEAN tumble angle_RIGHT=69.26, Dr=1.02 rad^2/s										MEAN tumble angle_LEFT=75.01, MEAN tumble angle_RIGHT=71.58, Dr=0.69 rad^2/s									MEAN tumble angle_LEFT=71.85, MEAN tumble angle_RIGHT=68.46, Dr=0.49 rad^2/s
1000 µM 2Dg
0-3 min										5-8 min									10-13 min									15-18 min
incompleteRuns =										incompleteRuns =									incompleteRuns =									incompleteRuns =
no										no									no									no
Movie=0X.txt, Cells=183, CWbias=0.22, Vrun=19.3 um/s, STD_Vrun=8.3, Vx=-0.7 um/s,										Movie=0X.txt, Cells=194, CWbias=0.20, Vrun=20.6 um/s, STD_Vrun=8.9, Vx=-0.1 um/s,									Movie=0X.txt, Cells=153, CWbias=0.16, Vrun=22.1 um/s, STD_Vrun=8.6, Vx=0.5 um/s,									Movie=0X.txt, Cells= 33, CWbias=0.17, Vrun=19.9 um/s, STD_Vrun=11.4, Vx=-2.2 um/s,
Movie=10X.txt, Cells=210, CWbias=0.33, Vrun=18.4 um/s, STD_Vrun=10.8, Vx=0.0 um/s,										Movie=10X.txt, Cells=193, CWbias=0.28, Vrun=16.9 um/s, STD_Vrun=7.5, Vx=0.6 um/s,									Movie=10X.txt, Cells=163, CWbias=0.34, Vrun=16.3 um/s, STD_Vrun=8.9, Vx=0.8 um/s,									Movie=10X.txt, Cells=183, CWbias=0.31, Vrun=16.4 um/s, STD_Vrun=9.1, Vx=0.5 um/s,
Movie=11X.txt, Cells=197, CWbias=0.33, Vrun=18.0 um/s, STD_Vrun=9.2, Vx=1.4 um/s,										Movie=11X.txt, Cells=198, CWbias=0.26, Vrun=16.7 um/s, STD_Vrun=7.5, Vx=-0.1 um/s,									Movie=11X.txt, Cells=173, CWbias=0.31, Vrun=16.4 um/s, STD_Vrun=8.5, Vx=-0.1 um/s,									Movie=11X.txt, Cells=146, CWbias=0.31, Vrun=15.1 um/s, STD_Vrun=8.7, Vx=0.3 um/s,
Movie=13X.txt, Cells=124, CWbias=0.36, Vrun=18.3 um/s, STD_Vrun=8.8, Vx=-0.9 um/s,										Movie=13X.txt, Cells=152, CWbias=0.26, Vrun=20.3 um/s, STD_Vrun=8.7, Vx=0.4 um/s,									Movie=13X.txt, Cells= 85, CWbias=0.24, Vrun=17.3 um/s, STD_Vrun=6.8, Vx=-0.3 um/s,									Movie=13X.txt, Cells= 99, CWbias=0.17, Vrun=16.9 um/s, STD_Vrun=6.2, Vx=-0.4 um/s,
Movie=14X.txt, Cells=130, CWbias=0.30, Vrun=19.1 um/s, STD_Vrun=9.1, Vx=-0.4 um/s,										Movie=14X.txt, Cells=103, CWbias=0.26, Vrun=19.5 um/s, STD_Vrun=8.4, Vx=0.1 um/s,									Movie=14X.txt, Cells=111, CWbias=0.19, Vrun=18.1 um/s, STD_Vrun=7.1, Vx=0.3 um/s,									Movie=14X.txt, Cells= 87, CWbias=0.21, Vrun=15.6 um/s, STD_Vrun=5.8, Vx=-0.1 um/s,
Movie=15X.txt, Cells=117, CWbias=0.30, Vrun=18.3 um/s, STD_Vrun=8.1, Vx=-1.1 um/s,										Movie=15X.txt, Cells=118, CWbias=0.23, Vrun=21.3 um/s, STD_Vrun=8.6, Vx=-0.1 um/s,									Movie=15X.txt, Cells=100, CWbias=0.24, Vrun=16.9 um/s, STD_Vrun=6.5, Vx=-0.0 um/s,									Movie=15X.txt, Cells=105, CWbias=0.26, Vrun=16.2 um/s, STD_Vrun=7.3, Vx=-0.5 um/s,
Movie=1X.txt, Cells=149, CWbias=0.34, Vrun=17.9 um/s, STD_Vrun=8.1, Vx=-0.3 um/s,										Movie=1X.txt, Cells=225, CWbias=0.24, Vrun=21.3 um/s, STD_Vrun=9.6, Vx=-0.4 um/s,									Movie=1X.txt, Cells=127, CWbias=0.26, Vrun=19.1 um/s, STD_Vrun=9.1, Vx=-0.5 um/s,									Movie=1X.txt, Cells=137, CWbias=0.25, Vrun=16.8 um/s, STD_Vrun=6.9, Vx=0.2 um/s,
Movie=20X.txt, Cells=115, CWbias=0.28, Vrun=16.9 um/s, STD_Vrun=7.9, Vx=0.2 um/s,										Movie=20X.txt, Cells=103, CWbias=0.26, Vrun=19.2 um/s, STD_Vrun=8.0, Vx=0.2 um/s,									Movie=20X.txt, Cells=142, CWbias=0.25, Vrun=17.7 um/s, STD_Vrun=7.5, Vx=0.0 um/s,									Movie=20X.txt, Cells=152, CWbias=0.16, Vrun=17.6 um/s, STD_Vrun=7.3, Vx=-0.6 um/s,
Movie=21X.txt, Cells=112, CWbias=0.30, Vrun=17.3 um/s, STD_Vrun=7.8, Vx=0.2 um/s,										Movie=21X.txt, Cells=127, CWbias=0.30, Vrun=18.8 um/s, STD_Vrun=8.0, Vx=-0.7 um/s,									Movie=21X.txt, Cells=114, CWbias=0.33, Vrun=16.6 um/s, STD_Vrun=8.3, Vx=0.0 um/s,									Movie=21X.txt, Cells=118, CWbias=0.24, Vrun=16.3 um/s, STD_Vrun=6.7, Vx=0.4 um/s,
Movie=22X.txt, Cells=152, CWbias=0.28, Vrun=18.8 um/s, STD_Vrun=8.5, Vx=-0.8 um/s,										Movie=22X.txt, Cells=115, CWbias=0.22, Vrun=20.7 um/s, STD_Vrun=9.0, Vx=-0.1 um/s,									Movie=22X.txt, Cells=133, CWbias=0.24, Vrun=17.3 um/s, STD_Vrun=7.5, Vx=-0.8 um/s,									Movie=22X.txt, Cells=102, CWbias=0.22, Vrun=16.1 um/s, STD_Vrun=7.1, Vx=-0.5 um/s,
Movie=2X.txt, Cells=144, CWbias=0.29, Vrun=17.7 um/s, STD_Vrun=7.3, Vx=0.3 um/s,										Movie=2X.txt, Cells=158, CWbias=0.23, Vrun=21.7 um/s, STD_Vrun=9.4, Vx=0.4 um/s,									Movie=2X.txt, Cells=115, CWbias=0.21, Vrun=18.8 um/s, STD_Vrun=7.2, Vx=0.6 um/s,									Movie=2X.txt, Cells=174, CWbias=0.25, Vrun=17.4 um/s, STD_Vrun=7.9, Vx=-0.0 um/s,
Movie=30X.txt, Cells=180, CWbias=0.26, Vrun=17.4 um/s, STD_Vrun=8.4, Vx=-0.4 um/s,										Movie=30X.txt, Cells=167, CWbias=0.24, Vrun=19.5 um/s, STD_Vrun=9.2, Vx=-0.4 um/s,									Movie=30X.txt, Cells=215, CWbias=0.22, Vrun=18.4 um/s, STD_Vrun=7.8, Vx=-0.3 um/s,									Movie=30X.txt, Cells=185, CWbias=0.17, Vrun=18.0 um/s, STD_Vrun=7.5, Vx=-0.6 um/s,
Movie=31X.txt, Cells=166, CWbias=0.24, Vrun=17.8 um/s, STD_Vrun=8.3, Vx=-0.4 um/s,										Movie=31X.txt, Cells=162, CWbias=0.26, Vrun=20.0 um/s, STD_Vrun=9.9, Vx=0.4 um/s,									Movie=31X.txt, Cells=193, CWbias=0.25, Vrun=18.3 um/s, STD_Vrun=9.0, Vx=0.8 um/s,									Movie=31X.txt, Cells=184, CWbias=0.22, Vrun=17.2 um/s, STD_Vrun=7.6, Vx=-0.6 um/s,
Movie=32X.txt, Cells=234, CWbias=0.27, Vrun=19.1 um/s, STD_Vrun=8.9, Vx=-0.1 um/s,										Movie=32X.txt, Cells=177, CWbias=0.27, Vrun=21.0 um/s, STD_Vrun=11.0, Vx=1.6 um/s,									Movie=32X.txt, Cells=203, CWbias=0.20, Vrun=18.9 um/s, STD_Vrun=7.5, Vx=-1.5 um/s,									Movie=32X.txt, Cells=191, CWbias=0.18, Vrun=17.3 um/s, STD_Vrun=7.1, Vx=-0.1 um/s,
Movie=33X.txt, Cells=164, CWbias=0.28, Vrun=18.5 um/s, STD_Vrun=9.0, Vx=-0.6 um/s,										Movie=33X.txt, Cells=191, CWbias=0.24, Vrun=20.5 um/s, STD_Vrun=9.3, Vx=-0.3 um/s,									Movie=33X.txt, Cells=180, CWbias=0.22, Vrun=19.2 um/s, STD_Vrun=8.5, Vx=0.2 um/s,									Movie=33X.txt, Cells=189, CWbias=0.20, Vrun=17.1 um/s, STD_Vrun=7.1, Vx=-0.7 um/s,
Movie=34X.txt, Cells=157, CWbias=0.26, Vrun=18.6 um/s, STD_Vrun=9.8, Vx=0.4 um/s,										Movie=34X.txt, Cells=198, CWbias=0.27, Vrun=21.4 um/s, STD_Vrun=9.8, Vx=0.3 um/s,									Movie=34X.txt, Cells=197, CWbias=0.19, Vrun=19.1 um/s, STD_Vrun=7.9, Vx=0.1 um/s,									Movie=34X.txt, Cells=205, CWbias=0.16, Vrun=17.4 um/s, STD_Vrun=6.9, Vx=-0.0 um/s,
Movie=35X.txt, Cells=181, CWbias=0.31, Vrun=19.9 um/s, STD_Vrun=10.1, Vx=-1.0 um/s,										Movie=35X.txt, Cells=185, CWbias=0.28, Vrun=20.6 um/s, STD_Vrun=10.1, Vx=1.7 um/s,									Movie=35X.txt, Cells=216, CWbias=0.20, Vrun=18.8 um/s, STD_Vrun=7.9, Vx=1.4 um/s,									Movie=35X.txt, Cells=179, CWbias=0.20, Vrun=17.5 um/s, STD_Vrun=8.3, Vx=1.2 um/s,
Movie=3X.txt, Cells=145, CWbias=0.26, Vrun=18.8 um/s, STD_Vrun=7.8, Vx=-0.1 um/s,										Movie=3X.txt, Cells=168, CWbias=0.17, Vrun=23.1 um/s, STD_Vrun=10.1, Vx=0.1 um/s,									Movie=3X.txt, Cells=116, CWbias=0.23, Vrun=18.7 um/s, STD_Vrun=7.5, Vx=1.0 um/s,									Movie=3X.txt, Cells=172, CWbias=0.22, Vrun=16.1 um/s, STD_Vrun=6.1, Vx=-0.3 um/s,
Movie=4X.txt, Cells=130, CWbias=0.24, Vrun=19.0 um/s, STD_Vrun=8.2, Vx=-0.2 um/s,										Movie=4X.txt, Cells=158, CWbias=0.27, Vrun=21.4 um/s, STD_Vrun=9.4, Vx=0.0 um/s,									Movie=4X.txt, Cells=160, CWbias=0.19, Vrun=18.8 um/s, STD_Vrun=8.5, Vx=-0.0 um/s,									Movie=4X.txt, Cells=144, CWbias=0.19, Vrun=17.8 um/s, STD_Vrun=7.5, Vx=-0.2 um/s,
Movie=5X.txt, Cells=147, CWbias=0.31, Vrun=18.9 um/s, STD_Vrun=8.8, Vx=0.0 um/s,										Movie=5X.txt, Cells=196, CWbias=0.26, Vrun=20.8 um/s, STD_Vrun=9.4, Vx=0.1 um/s,									Movie=6X.txt, Cells=316, CWbias=0.15, Vrun=18.5 um/s, STD_Vrun=7.6, Vx=0.2 um/s,									Movie=5X.txt, Cells= 67, CWbias=0.28, Vrun=16.4 um/s, STD_Vrun=9.0, Vx=1.4 um/s,
Movie=6X.txt, Cells=386, CWbias=0.21, Vrun=19.1 um/s, STD_Vrun=8.3, Vx=0.2 um/s,										Movie=6X.txt, Cells=237, CWbias=0.25, Vrun=19.2 um/s, STD_Vrun=8.8, Vx=0.2 um/s,									Movie=7X.txt, Cells=303, CWbias=0.21, Vrun=17.5 um/s, STD_Vrun=7.5, Vx=0.1 um/s,									Movie=6X.txt, Cells=197, CWbias=0.27, Vrun=15.7 um/s, STD_Vrun=7.6, Vx=-0.1 um/s,
Movie=7X.txt, Cells=256, CWbias=0.27, Vrun=18.2 um/s, STD_Vrun=8.5, Vx=0.2 um/s,										Movie=7X.txt, Cells=175, CWbias=0.36, Vrun=17.4 um/s, STD_Vrun=8.2, Vx=-0.5 um/s,									Movie=8X.txt, Cells=244, CWbias=0.31, Vrun=17.1 um/s, STD_Vrun=9.6, Vx=0.5 um/s,									Movie=7X.txt, Cells=137, CWbias=0.28, Vrun=15.4 um/s, STD_Vrun=7.0, Vx=0.1 um/s,
Movie=8X.txt, Cells=174, CWbias=0.36, Vrun=17.0 um/s, STD_Vrun=8.7, Vx=-1.0 um/s,										Movie=8X.txt, Cells=187, CWbias=0.31, Vrun=17.0 um/s, STD_Vrun=7.1, Vx=-0.0 um/s,									Movie=9X.txt, Cells=135, CWbias=0.36, Vrun=15.9 um/s, STD_Vrun=8.5, Vx=-0.1 um/s,									Movie=8X.txt, Cells=161, CWbias=0.27, Vrun=15.6 um/s, STD_Vrun=8.3, Vx=0.0 um/s,
Movie=9X.txt, Cells=239, CWbias=0.36, Vrun=17.9 um/s, STD_Vrun=9.3, Vx=0.1 um/s,										Movie=9X.txt, Cells=181, CWbias=0.27, Vrun=17.1 um/s, STD_Vrun=7.4, Vx=-0.2 um/s,									TotalCells=3894,									Movie=9X.txt, Cells=168, CWbias=0.28, Vrun=15.1 um/s, STD_Vrun=6.8, Vx=-0.1 um/s,
TotalCells=4192,										TotalCells=4068,									CWbias=0.23, Vrun=18.3um/s, STD_Vrun=8.1, Vx=0.1um/s, Vy=-0.2um/s									TotalCells=3515,
CWbias=0.28, Vrun=18.4um/s, STD_Vrun=8.7, Vx=-0.2um/s, Vy=-0.1um/s										CWbias=0.26, Vrun=19.8um/s, STD_Vrun=9.1, Vx=0.1um/s, Vy=-0.2um/s									Run duration: fitting exp(t/Tau)=0.13 s, CWbias_LEFT=0.24, CWbias_RIGHT=0.23,									CWbias=0.23, Vrun=16.7um/s, STD_Vrun=7.4, Vx=-0.1um/s, Vy=-0.2um/s
Run duration: fitting exp(t/Tau)=0.12 s, CWbias_LEFT=0.28, CWbias_RIGHT=0.29,										Run duration: fitting exp(t/Tau)=0.13 s, CWbias_LEFT=0.27, CWbias_RIGHT=0.26,									Tumble duration: fitting exp(t/Tau)=0.02 s									Run duration: fitting exp(t/Tau)=0.14 s, CWbias_LEFT=0.23, CWbias_RIGHT=0.23,
Tumble duration: fitting exp(t/Tau)=0.02 s										Tumble duration: fitting exp(t/Tau)=0.02 s									MEAN tumble angle_LEFT=74.10, MEAN tumble angle_RIGHT=71.73, Dr=1.02 rad^2/s									Tumble duration: fitting exp(t/Tau)=0.02 s
MEAN tumble angle_LEFT=75.37, MEAN tumble angle_RIGHT=72.98, Dr=1.19 rad^2/s										MEAN tumble angle_LEFT=75.13, MEAN tumble angle_RIGHT=73.14, Dr=0.96 rad^2/s																		MEAN tumble angle_LEFT=74.04, MEAN tumble angle_RIGHT=71.59, Dr=1.61 rad^2/s

## Sheet: Figure 4(D)_ptsI mutant
Motility buffer									ΔptsI RP437 average run speed
0-3 min										5-8 min										10-13 min										15-18 min
incompleteRuns =										incompleteRuns =										incompleteRuns =
																														incompleteRuns =
no										no										no
																														no
Movie=0X.txt, Cells=197, CWbias=0.24, Vrun=18.1 um/s, STD_Vrun=8.5, Vx=0.4 um/s,										Movie=0X.txt, Cells=138, CWbias=0.20, Vrun=22.2 um/s, STD_Vrun=10.0, Vx=-0.1 um/s,										Movie=0X.txt, Cells=138, CWbias=0.13, Vrun=22.7 um/s, STD_Vrun=10.2, Vx=-0.2 um/s,
Movie=10X.txt, Cells=203, CWbias=0.16, Vrun=18.3 um/s, STD_Vrun=7.8, Vx=0.5 um/s,										Movie=10X.txt, Cells=196, CWbias=0.25, Vrun=19.7 um/s, STD_Vrun=8.3, Vx=-0.8 um/s,										Movie=10X.txt, Cells=155, CWbias=0.25, Vrun=20.7 um/s, STD_Vrun=9.0, Vx=0.6 um/s,										Movie=0X.txt, Cells=355, CWbias=0.13, Vrun=23.4 um/s, STD_Vrun=10.0, Vx=-0.9 um/s,
Movie=11X.txt, Cells=130, CWbias=0.26, Vrun=17.8 um/s, STD_Vrun=8.2, Vx=-1.8 um/s,										Movie=11X.txt, Cells=111, CWbias=0.23, Vrun=21.1 um/s, STD_Vrun=9.0, Vx=1.9 um/s,										Movie=11X.txt, Cells=157, CWbias=0.24, Vrun=19.2 um/s, STD_Vrun=8.1, Vx=-0.9 um/s,										Movie=10X.txt, Cells=165, CWbias=0.21, Vrun=19.1 um/s, STD_Vrun=7.3, Vx=0.2 um/s,
Movie=12X.txt, Cells=139, CWbias=0.26, Vrun=19.0 um/s, STD_Vrun=9.1, Vx=0.4 um/s,										Movie=12X.txt, Cells=162, CWbias=0.21, Vrun=21.5 um/s, STD_Vrun=9.3, Vx=-1.3 um/s,										Movie=12X.txt, Cells=159, CWbias=0.21, Vrun=18.6 um/s, STD_Vrun=7.9, Vx=0.5 um/s,										Movie=11X.txt, Cells=187, CWbias=0.25, Vrun=18.1 um/s, STD_Vrun=7.7, Vx=0.9 um/s,
Movie=13X.txt, Cells=121, CWbias=0.25, Vrun=18.5 um/s, STD_Vrun=8.3, Vx=-0.0 um/s,										Movie=13X.txt, Cells=122, CWbias=0.21, Vrun=21.3 um/s, STD_Vrun=9.9, Vx=1.3 um/s,										Movie=13X.txt, Cells=164, CWbias=0.17, Vrun=19.1 um/s, STD_Vrun=7.5, Vx=-0.8 um/s,										Movie=12X.txt, Cells=154, CWbias=0.21, Vrun=19.0 um/s, STD_Vrun=7.7, Vx=-0.3 um/s,
Movie=14X.txt, Cells=127, CWbias=0.21, Vrun=19.8 um/s, STD_Vrun=8.6, Vx=0.3 um/s,										Movie=14X.txt, Cells=184, CWbias=0.25, Vrun=22.0 um/s, STD_Vrun=9.7, Vx=-0.1 um/s,										Movie=14X.txt, Cells=185, CWbias=0.24, Vrun=18.8 um/s, STD_Vrun=8.0, Vx=-0.1 um/s,										Movie=13X.txt, Cells=187, CWbias=0.23, Vrun=18.6 um/s, STD_Vrun=8.1, Vx=0.4 um/s,
Movie=15X.txt, Cells=177, CWbias=0.21, Vrun=19.2 um/s, STD_Vrun=8.6, Vx=-0.3 um/s,										Movie=15X.txt, Cells=145, CWbias=0.21, Vrun=20.8 um/s, STD_Vrun=8.8, Vx=1.2 um/s,										Movie=15X.txt, Cells=173, CWbias=0.21, Vrun=18.2 um/s, STD_Vrun=7.8, Vx=0.2 um/s,										Movie=14X.txt, Cells=160, CWbias=0.23, Vrun=18.7 um/s, STD_Vrun=7.0, Vx=-1.2 um/s,
Movie=1X.txt, Cells=183, CWbias=0.26, Vrun=18.5 um/s, STD_Vrun=9.0, Vx=-0.3 um/s,										Movie=1X.txt, Cells=153, CWbias=0.25, Vrun=18.8 um/s, STD_Vrun=8.3, Vx=-0.3 um/s,										Movie=1X.txt, Cells=236, CWbias=0.15, Vrun=21.4 um/s, STD_Vrun=9.5, Vx=0.5 um/s,										Movie=15X.txt, Cells=180, CWbias=0.20, Vrun=18.6 um/s, STD_Vrun=7.5, Vx=1.0 um/s,
Movie=20X.txt, Cells=194, CWbias=0.30, Vrun=17.1 um/s, STD_Vrun=9.0, Vx=-0.0 um/s,										Movie=20X.txt, Cells= 93, CWbias=0.37, Vrun=17.8 um/s, STD_Vrun=8.8, Vx=-0.7 um/s,										Movie=20X.txt, Cells=237, CWbias=0.30, Vrun=17.0 um/s, STD_Vrun=9.0, Vx=-0.5 um/s,										Movie=1X.txt, Cells=407, CWbias=0.14, Vrun=23.3 um/s, STD_Vrun=10.2, Vx=0.6 um/s,
Movie=21X.txt, Cells=149, CWbias=0.24, Vrun=18.8 um/s, STD_Vrun=8.8, Vx=1.1 um/s,										Movie=21X.txt, Cells=116, CWbias=0.30, Vrun=19.2 um/s, STD_Vrun=8.7, Vx=-0.9 um/s,										Movie=21X.txt, Cells=137, CWbias=0.32, Vrun=16.5 um/s, STD_Vrun=9.0, Vx=0.6 um/s,										Movie=20X.txt, Cells=145, CWbias=0.32, Vrun=17.3 um/s, STD_Vrun=7.8, Vx=1.6 um/s,
Movie=22X.txt, Cells= 90, CWbias=0.30, Vrun=16.5 um/s, STD_Vrun=9.4, Vx=-0.4 um/s,										Movie=22X.txt, Cells=132, CWbias=0.29, Vrun=19.1 um/s, STD_Vrun=8.6, Vx=-0.3 um/s,										Movie=22X.txt, Cells=243, CWbias=0.31, Vrun=16.7 um/s, STD_Vrun=8.7, Vx=-0.2 um/s,										Movie=21X.txt, Cells=178, CWbias=0.27, Vrun=17.9 um/s, STD_Vrun=8.0, Vx=-0.8 um/s,
Movie=23X.txt, Cells=115, CWbias=0.28, Vrun=17.8 um/s, STD_Vrun=9.3, Vx=1.4 um/s,										Movie=23X.txt, Cells= 97, CWbias=0.31, Vrun=18.2 um/s, STD_Vrun=7.9, Vx=0.3 um/s,										Movie=23X.txt, Cells=210, CWbias=0.32, Vrun=16.5 um/s, STD_Vrun=8.3, Vx=0.0 um/s,										Movie=22X.txt, Cells=174, CWbias=0.27, Vrun=17.4 um/s, STD_Vrun=7.5, Vx=0.0 um/s,
Movie=24X.txt, Cells=196, CWbias=0.25, Vrun=18.2 um/s, STD_Vrun=9.5, Vx=-0.8 um/s,										Movie=24X.txt, Cells=141, CWbias=0.30, Vrun=18.0 um/s, STD_Vrun=9.6, Vx=0.4 um/s,										Movie=24X.txt, Cells=199, CWbias=0.35, Vrun=17.3 um/s, STD_Vrun=10.1, Vx=-0.2 um/s,										Movie=23X.txt, Cells=129, CWbias=0.31, Vrun=16.7 um/s, STD_Vrun=7.7, Vx=0.6 um/s,
Movie=25X.txt, Cells=170, CWbias=0.24, Vrun=19.3 um/s, STD_Vrun=9.5, Vx=-0.3 um/s,										Movie=25X.txt, Cells=159, CWbias=0.32, Vrun=17.5 um/s, STD_Vrun=7.8, Vx=-1.1 um/s,										Movie=25X.txt, Cells=200, CWbias=0.32, Vrun=17.3 um/s, STD_Vrun=9.5, Vx=0.3 um/s,										Movie=24X.txt, Cells=202, CWbias=0.32, Vrun=17.1 um/s, STD_Vrun=8.2, Vx=-0.2 um/s,
Movie=2X.txt, Cells=171, CWbias=0.20, Vrun=18.2 um/s, STD_Vrun=8.1, Vx=-0.8 um/s,										Movie=2X.txt, Cells=217, CWbias=0.18, Vrun=19.7 um/s, STD_Vrun=8.5, Vx=-0.3 um/s,										Movie=2X.txt, Cells=242, CWbias=0.16, Vrun=22.0 um/s, STD_Vrun=9.7, Vx=0.5 um/s,										Movie=25X.txt, Cells=165, CWbias=0.39, Vrun=16.5 um/s, STD_Vrun=8.4, Vx=0.3 um/s,
Movie=30X.txt, Cells= 83, CWbias=0.31, Vrun=15.6 um/s, STD_Vrun=6.6, Vx=0.3 um/s,										Movie=30X.txt, Cells= 91, CWbias=0.31, Vrun=17.9 um/s, STD_Vrun=8.2, Vx=-0.9 um/s,										Movie=30X.txt, Cells=123, CWbias=0.22, Vrun=19.6 um/s, STD_Vrun=8.8, Vx=-0.3 um/s,										Movie=2X.txt, Cells=349, CWbias=0.14, Vrun=22.7 um/s, STD_Vrun=10.6, Vx=-0.2 um/s,
Movie=31X.txt, Cells= 88, CWbias=0.26, Vrun=15.7 um/s, STD_Vrun=7.5, Vx=-0.4 um/s,										Movie=31X.txt, Cells=109, CWbias=0.22, Vrun=19.9 um/s, STD_Vrun=8.2, Vx=-1.6 um/s,										Movie=31X.txt, Cells=146, CWbias=0.19, Vrun=20.1 um/s, STD_Vrun=8.5, Vx=-0.5 um/s,										Movie=30X.txt, Cells=174, CWbias=0.22, Vrun=17.9 um/s, STD_Vrun=7.1, Vx=-1.0 um/s,
Movie=32X.txt, Cells= 76, CWbias=0.28, Vrun=16.7 um/s, STD_Vrun=7.4, Vx=0.1 um/s,										Movie=32X.txt, Cells=108, CWbias=0.23, Vrun=20.0 um/s, STD_Vrun=8.9, Vx=-0.0 um/s,										Movie=32X.txt, Cells=128, CWbias=0.18, Vrun=18.8 um/s, STD_Vrun=6.8, Vx=0.9 um/s,										Movie=31X.txt, Cells=153, CWbias=0.24, Vrun=17.8 um/s, STD_Vrun=7.4, Vx=0.6 um/s,
Movie=33X.txt, Cells= 96, CWbias=0.28, Vrun=17.2 um/s, STD_Vrun=8.0, Vx=-0.3 um/s,										Movie=33X.txt, Cells=106, CWbias=0.26, Vrun=19.8 um/s, STD_Vrun=9.5, Vx=-0.9 um/s,										Movie=33X.txt, Cells=126, CWbias=0.25, Vrun=16.6 um/s, STD_Vrun=7.5, Vx=0.3 um/s,										Movie=32X.txt, Cells=136, CWbias=0.19, Vrun=18.2 um/s, STD_Vrun=6.9, Vx=-2.7 um/s,
Movie=34X.txt, Cells=111, CWbias=0.29, Vrun=17.5 um/s, STD_Vrun=8.7, Vx=-0.5 um/s,										Movie=34X.txt, Cells=140, CWbias=0.28, Vrun=19.9 um/s, STD_Vrun=9.3, Vx=-0.5 um/s,										Movie=34X.txt, Cells=148, CWbias=0.25, Vrun=18.0 um/s, STD_Vrun=8.3, Vx=-1.8 um/s,										Movie=33X.txt, Cells=146, CWbias=0.20, Vrun=19.1 um/s, STD_Vrun=7.8, Vx=1.5 um/s,
Movie=35X.txt, Cells=102, CWbias=0.29, Vrun=17.8 um/s, STD_Vrun=9.1, Vx=-2.3 um/s,										Movie=35X.txt, Cells=146, CWbias=0.24, Vrun=19.4 um/s, STD_Vrun=8.3, Vx=0.1 um/s,										Movie=35X.txt, Cells=118, CWbias=0.27, Vrun=18.7 um/s, STD_Vrun=8.9, Vx=-1.8 um/s,										Movie=34X.txt, Cells=194, CWbias=0.19, Vrun=18.4 um/s, STD_Vrun=7.4, Vx=-1.3 um/s,
Movie=3X.txt, Cells=162, CWbias=0.21, Vrun=19.2 um/s, STD_Vrun=9.5, Vx=0.4 um/s,										Movie=3X.txt, Cells=207, CWbias=0.21, Vrun=20.1 um/s, STD_Vrun=8.5, Vx=0.9 um/s,										Movie=3X.txt, Cells=306, CWbias=0.14, Vrun=22.3 um/s, STD_Vrun=9.5, Vx=0.1 um/s,										Movie=35X.txt, Cells=171, CWbias=0.24, Vrun=18.3 um/s, STD_Vrun=7.8, Vx=0.3 um/s,
Movie=4X.txt, Cells=147, CWbias=0.25, Vrun=18.7 um/s, STD_Vrun=9.6, Vx=-0.4 um/s,										Movie=4X.txt, Cells=155, CWbias=0.25, Vrun=19.0 um/s, STD_Vrun=9.3, Vx=0.4 um/s,										Movie=4X.txt, Cells=286, CWbias=0.15, Vrun=21.3 um/s, STD_Vrun=8.8, Vx=0.2 um/s,										Movie=3X.txt, Cells=389, CWbias=0.15, Vrun=21.7 um/s, STD_Vrun=9.5, Vx=0.9 um/s,
Movie=5X.txt, Cells=117, CWbias=0.25, Vrun=19.3 um/s, STD_Vrun=10.1, Vx=-1.0 um/s,										Movie=5X.txt, Cells=170, CWbias=0.15, Vrun=20.1 um/s, STD_Vrun=8.2, Vx=0.1 um/s,										Movie=5X.txt, Cells=278, CWbias=0.16, Vrun=22.0 um/s, STD_Vrun=10.0, Vx=-0.9 um/s,										Movie=4X.txt, Cells=312, CWbias=0.16, Vrun=21.6 um/s, STD_Vrun=10.3, Vx=-0.5 um/s,
TotalCells=3344,										TotalCells=3398,										TotalCells=4494,										Movie=5X.txt, Cells=341, CWbias=0.15, Vrun=21.8 um/s, STD_Vrun=9.8, Vx=0.0 um/s,
CWbias=0.25, Vrun=18.2um/s, STD_Vrun=8.7, Vx=-0.2um/s, Vy=-0.1um/s										CWbias=0.25, Vrun=19.8um/s, STD_Vrun=8.9, Vx=-0.1um/s, Vy=-0.0um/s										CWbias=0.23, Vrun=19.3um/s, STD_Vrun=9.0, Vx=-0.1um/s, Vy=-0.1um/s										TotalCells=5153,
Run duration: fitting exp(t/Tau)=0.13 s, CWbias_LEFT=0.25, CWbias_RIGHT=0.25,										Run duration: fitting exp(t/Tau)=0.13 s, CWbias_LEFT=0.25, CWbias_RIGHT=0.25,										Run duration: fitting exp(t/Tau)=0.13 s, CWbias_LEFT=0.23, CWbias_RIGHT=0.23,										CWbias=0.21, Vrun=19.7um/s, STD_Vrun=8.9, Vx=0.0um/s, Vy=0.2um/s
Tumble duration: fitting exp(t/Tau)=0.02 s										Tumble duration: fitting exp(t/Tau)=0.02 s										Tumble duration: fitting exp(t/Tau)=0.02 s										Run duration: fitting exp(t/Tau)=0.13 s, CWbias_LEFT=0.22, CWbias_RIGHT=0.22,
MEAN tumble angle_LEFT=77.07, MEAN tumble angle_RIGHT=75.24, Dr=1.47 rad^2/s										MEAN tumble angle_LEFT=77.17, MEAN tumble angle_RIGHT=74.19, Dr=1.08 rad^2/s										MEAN tumble angle_LEFT=74.92, MEAN tumble angle_RIGHT=73.27, Dr=1.07 rad^2/s										Tumble duration: fitting exp(t/Tau)=0.02 s
>>										>>										>>										MEAN tumble angle_LEFT=72.99, MEAN tumble angle_RIGHT=70.99, Dr=0.92 rad^2/s
																														>>
1000 µM Glucose
0-3 min										5-8 min										10-13 min										15-18 min
incompleteRuns =										incompleteRuns =										incompleteRuns =										incompleteRuns =
no										no										no										no
Movie=0X.txt, Cells=238, CWbias=0.14, Vrun=19.4 um/s, STD_Vrun=8.2, Vx=-0.1 um/s,										Movie=0X.txt, Cells=179, CWbias=0.27, Vrun=21.5 um/s, STD_Vrun=9.8, Vx=0.2 um/s,										Movie=0X.txt, Cells=186, CWbias=0.24, Vrun=22.0 um/s, STD_Vrun=10.6, Vx=-2.2 um/s,										Movie=0X.txt, Cells=212, CWbias=0.17, Vrun=25.4 um/s, STD_Vrun=9.3, Vx=0.3 um/s,
Movie=10X.txt, Cells=209, CWbias=0.15, Vrun=17.9 um/s, STD_Vrun=7.0, Vx=0.7 um/s,										Movie=10X.txt, Cells=102, CWbias=0.23, Vrun=20.8 um/s, STD_Vrun=8.4, Vx=-1.2 um/s,										Movie=10X.txt, Cells=167, CWbias=0.24, Vrun=20.0 um/s, STD_Vrun=7.8, Vx=-0.3 um/s,										Movie=10X.txt, Cells=193, CWbias=0.19, Vrun=20.9 um/s, STD_Vrun=7.4, Vx=0.5 um/s,
Movie=11X.txt, Cells=232, CWbias=0.12, Vrun=17.8 um/s, STD_Vrun=7.1, Vx=0.5 um/s,										Movie=11X.txt, Cells=163, CWbias=0.31, Vrun=21.6 um/s, STD_Vrun=10.2, Vx=-0.6 um/s,										Movie=11X.txt, Cells=162, CWbias=0.24, Vrun=19.5 um/s, STD_Vrun=7.2, Vx=-0.1 um/s,										Movie=11X.txt, Cells=215, CWbias=0.23, Vrun=20.0 um/s, STD_Vrun=8.5, Vx=-1.2 um/s,
Movie=12X.txt, Cells=216, CWbias=0.14, Vrun=17.7 um/s, STD_Vrun=7.3, Vx=1.2 um/s,										Movie=12X.txt, Cells=217, CWbias=0.24, Vrun=21.7 um/s, STD_Vrun=9.2, Vx=0.1 um/s,										Movie=12X.txt, Cells=227, CWbias=0.24, Vrun=19.7 um/s, STD_Vrun=7.5, Vx=0.1 um/s,										Movie=12X.txt, Cells=226, CWbias=0.21, Vrun=21.1 um/s, STD_Vrun=9.3, Vx=0.5 um/s,
Movie=13X.txt, Cells=149, CWbias=0.18, Vrun=20.0 um/s, STD_Vrun=8.2, Vx=-0.7 um/s,										Movie=13X.txt, Cells=183, CWbias=0.25, Vrun=22.3 um/s, STD_Vrun=9.3, Vx=-0.6 um/s,										Movie=13X.txt, Cells=167, CWbias=0.26, Vrun=19.2 um/s, STD_Vrun=7.8, Vx=-0.7 um/s,										Movie=13X.txt, Cells=200, CWbias=0.24, Vrun=20.5 um/s, STD_Vrun=8.1, Vx=-1.2 um/s,
Movie=14X.txt, Cells=201, CWbias=0.14, Vrun=18.9 um/s, STD_Vrun=7.3, Vx=-1.5 um/s,										Movie=14X.txt, Cells=147, CWbias=0.26, Vrun=21.5 um/s, STD_Vrun=8.6, Vx=0.5 um/s,										Movie=14X.txt, Cells=138, CWbias=0.30, Vrun=19.3 um/s, STD_Vrun=8.4, Vx=0.9 um/s,										Movie=14X.txt, Cells=242, CWbias=0.25, Vrun=20.3 um/s, STD_Vrun=8.0, Vx=-1.0 um/s,
Movie=15X.txt, Cells=138, CWbias=0.22, Vrun=19.4 um/s, STD_Vrun=7.6, Vx=-0.4 um/s,										Movie=15X.txt, Cells=140, CWbias=0.23, Vrun=22.0 um/s, STD_Vrun=8.9, Vx=0.4 um/s,										Movie=15X.txt, Cells=141, CWbias=0.28, Vrun=19.0 um/s, STD_Vrun=7.3, Vx=0.2 um/s,										Movie=15X.txt, Cells=143, CWbias=0.27, Vrun=20.2 um/s, STD_Vrun=8.0, Vx=-1.5 um/s,
Movie=1X.txt, Cells=179, CWbias=0.23, Vrun=18.2 um/s, STD_Vrun=8.5, Vx=1.1 um/s,										Movie=1X.txt, Cells=168, CWbias=0.27, Vrun=24.1 um/s, STD_Vrun=11.5, Vx=1.1 um/s,										Movie=1X.txt, Cells=204, CWbias=0.17, Vrun=22.7 um/s, STD_Vrun=8.8, Vx=-1.5 um/s,										Movie=1X.txt, Cells=205, CWbias=0.13, Vrun=23.0 um/s, STD_Vrun=9.0, Vx=1.5 um/s,
Movie=20X.txt, Cells=271, CWbias=0.20, Vrun=20.6 um/s, STD_Vrun=9.7, Vx=0.3 um/s,										Movie=20X.txt, Cells=228, CWbias=0.24, Vrun=23.1 um/s, STD_Vrun=10.1, Vx=-0.9 um/s,										Movie=20X.txt, Cells=190, CWbias=0.23, Vrun=22.9 um/s, STD_Vrun=9.9, Vx=-0.3 um/s,										Movie=20X.txt, Cells=182, CWbias=0.23, Vrun=24.7 um/s, STD_Vrun=10.6, Vx=-1.1 um/s,
Movie=21X.txt, Cells=196, CWbias=0.18, Vrun=20.8 um/s, STD_Vrun=9.5, Vx=0.3 um/s,										Movie=21X.txt, Cells=211, CWbias=0.27, Vrun=22.2 um/s, STD_Vrun=10.0, Vx=-0.4 um/s,										Movie=21X.txt, Cells=202, CWbias=0.23, Vrun=23.3 um/s, STD_Vrun=10.3, Vx=0.1 um/s,										Movie=21X.txt, Cells=203, CWbias=0.23, Vrun=25.3 um/s, STD_Vrun=10.5, Vx=-0.1 um/s,
Movie=22X.txt, Cells=200, CWbias=0.22, Vrun=19.5 um/s, STD_Vrun=9.2, Vx=-0.3 um/s,										Movie=22X.txt, Cells=226, CWbias=0.24, Vrun=22.7 um/s, STD_Vrun=9.8, Vx=-0.7 um/s,										Movie=22X.txt, Cells=267, CWbias=0.18, Vrun=24.4 um/s, STD_Vrun=10.2, Vx=1.1 um/s,										Movie=22X.txt, Cells=179, CWbias=0.20, Vrun=23.8 um/s, STD_Vrun=9.8, Vx=0.1 um/s,
Movie=23X.txt, Cells=222, CWbias=0.21, Vrun=21.4 um/s, STD_Vrun=9.6, Vx=-0.2 um/s,										Movie=23X.txt, Cells=184, CWbias=0.29, Vrun=23.6 um/s, STD_Vrun=10.8, Vx=0.0 um/s,										Movie=23X.txt, Cells=211, CWbias=0.21, Vrun=23.8 um/s, STD_Vrun=9.6, Vx=1.5 um/s,										Movie=23X.txt, Cells= 96, CWbias=0.28, Vrun=22.9 um/s, STD_Vrun=9.5, Vx=-1.1 um/s,
Movie=24X.txt, Cells=192, CWbias=0.20, Vrun=20.2 um/s, STD_Vrun=9.3, Vx=-0.3 um/s,										Movie=24X.txt, Cells=208, CWbias=0.28, Vrun=23.4 um/s, STD_Vrun=10.4, Vx=-0.3 um/s,										Movie=24X.txt, Cells=231, CWbias=0.22, Vrun=24.6 um/s, STD_Vrun=9.9, Vx=0.7 um/s,										Movie=24X.txt, Cells=137, CWbias=0.23, Vrun=24.6 um/s, STD_Vrun=10.7, Vx=-0.5 um/s,
Movie=25X.txt, Cells=233, CWbias=0.20, Vrun=22.5 um/s, STD_Vrun=10.3, Vx=0.5 um/s,										Movie=25X.txt, Cells=252, CWbias=0.25, Vrun=23.1 um/s, STD_Vrun=9.9, Vx=-0.7 um/s,										Movie=25X.txt, Cells=253, CWbias=0.27, Vrun=23.1 um/s, STD_Vrun=10.3, Vx=0.2 um/s,										Movie=25X.txt, Cells=217, CWbias=0.20, Vrun=23.4 um/s, STD_Vrun=9.6, Vx=0.1 um/s,
Movie=2X.txt, Cells=153, CWbias=0.27, Vrun=17.5 um/s, STD_Vrun=8.2, Vx=0.2 um/s,										Movie=2X.txt, Cells=152, CWbias=0.24, Vrun=22.6 um/s, STD_Vrun=9.6, Vx=0.2 um/s,										Movie=2X.txt, Cells=210, CWbias=0.18, Vrun=22.1 um/s, STD_Vrun=9.1, Vx=-0.5 um/s,										Movie=2X.txt, Cells=229, CWbias=0.16, Vrun=23.3 um/s, STD_Vrun=8.9, Vx=1.1 um/s,
Movie=30X.txt, Cells=157, CWbias=0.16, Vrun=17.0 um/s, STD_Vrun=6.0, Vx=-0.9 um/s,										Movie=30X.txt, Cells= 85, CWbias=0.27, Vrun=19.5 um/s, STD_Vrun=8.1, Vx=0.7 um/s,										Movie=30X.txt, Cells=115, CWbias=0.20, Vrun=20.7 um/s, STD_Vrun=7.1, Vx=0.0 um/s,										Movie=30X.txt, Cells= 93, CWbias=0.22, Vrun=20.4 um/s, STD_Vrun=8.5, Vx=0.4 um/s,
Movie=31X.txt, Cells=100, CWbias=0.28, Vrun=16.0 um/s, STD_Vrun=7.2, Vx=-0.5 um/s,										Movie=31X.txt, Cells= 82, CWbias=0.24, Vrun=21.4 um/s, STD_Vrun=9.7, Vx=-0.5 um/s,										Movie=31X.txt, Cells=102, CWbias=0.23, Vrun=20.0 um/s, STD_Vrun=7.8, Vx=0.2 um/s,										Movie=31X.txt, Cells= 93, CWbias=0.26, Vrun=19.4 um/s, STD_Vrun=7.6, Vx=0.4 um/s,
Movie=32X.txt, Cells= 85, CWbias=0.30, Vrun=16.5 um/s, STD_Vrun=7.6, Vx=0.4 um/s,										Movie=32X.txt, Cells= 91, CWbias=0.27, Vrun=21.8 um/s, STD_Vrun=9.6, Vx=0.1 um/s,										Movie=32X.txt, Cells= 93, CWbias=0.20, Vrun=19.4 um/s, STD_Vrun=6.8, Vx=1.5 um/s,										Movie=32X.txt, Cells= 75, CWbias=0.17, Vrun=21.5 um/s, STD_Vrun=7.5, Vx=1.1 um/s,
Movie=33X.txt, Cells= 78, CWbias=0.36, Vrun=15.9 um/s, STD_Vrun=8.6, Vx=-0.4 um/s,										Movie=33X.txt, Cells=125, CWbias=0.31, Vrun=20.7 um/s, STD_Vrun=9.4, Vx=-0.5 um/s,										Movie=33X.txt, Cells=119, CWbias=0.24, Vrun=19.2 um/s, STD_Vrun=7.5, Vx=-0.7 um/s,										Movie=33X.txt, Cells=105, CWbias=0.23, Vrun=21.2 um/s, STD_Vrun=7.7, Vx=-1.8 um/s,
Movie=34X.txt, Cells=101, CWbias=0.28, Vrun=18.3 um/s, STD_Vrun=9.2, Vx=-0.5 um/s,										Movie=34X.txt, Cells=101, CWbias=0.31, Vrun=21.9 um/s, STD_Vrun=10.1, Vx=-0.2 um/s,										Movie=34X.txt, Cells=106, CWbias=0.16, Vrun=20.6 um/s, STD_Vrun=7.5, Vx=-1.7 um/s,										Movie=34X.txt, Cells=102, CWbias=0.18, Vrun=21.2 um/s, STD_Vrun=8.6, Vx=0.4 um/s,
Movie=35X.txt, Cells= 71, CWbias=0.24, Vrun=19.0 um/s, STD_Vrun=9.8, Vx=-0.6 um/s,										Movie=3X.txt, Cells=172, CWbias=0.22, Vrun=21.3 um/s, STD_Vrun=8.4, Vx=-0.0 um/s,										Movie=35X.txt, Cells= 89, CWbias=0.17, Vrun=20.2 um/s, STD_Vrun=6.9, Vx=-0.5 um/s,										Movie=35X.txt, Cells= 89, CWbias=0.23, Vrun=19.8 um/s, STD_Vrun=7.1, Vx=-1.0 um/s,
Movie=3X.txt, Cells=138, CWbias=0.25, Vrun=18.7 um/s, STD_Vrun=8.6, Vx=1.2 um/s,										Movie=4X.txt, Cells=219, CWbias=0.21, Vrun=23.0 um/s, STD_Vrun=9.3, Vx=0.8 um/s,										Movie=3X.txt, Cells=242, CWbias=0.20, Vrun=23.0 um/s, STD_Vrun=9.8, Vx=-0.2 um/s,										Movie=36X.txt, Cells=102, CWbias=0.12, Vrun=22.0 um/s, STD_Vrun=6.7, Vx=0.3 um/s,
Movie=4X.txt, Cells=170, CWbias=0.20, Vrun=19.5 um/s, STD_Vrun=8.9, Vx=0.4 um/s,										Movie=5X.txt, Cells=187, CWbias=0.20, Vrun=21.4 um/s, STD_Vrun=7.9, Vx=0.6 um/s,										Movie=4X.txt, Cells=198, CWbias=0.20, Vrun=21.9 um/s, STD_Vrun=7.6, Vx=-0.4 um/s,										Movie=3X.txt, Cells=290, CWbias=0.13, Vrun=24.3 um/s, STD_Vrun=8.6, Vx=-0.0 um/s,
Movie=5X.txt, Cells=146, CWbias=0.25, Vrun=18.0 um/s, STD_Vrun=8.1, Vx=0.3 um/s,										Movie=6X.txt, Cells=223, CWbias=0.24, Vrun=21.9 um/s, STD_Vrun=9.9, Vx=-0.8 um/s,										Movie=5X.txt, Cells=196, CWbias=0.17, Vrun=21.6 um/s, STD_Vrun=8.7, Vx=-0.6 um/s,										Movie=5X.txt, Cells=261, CWbias=0.14, Vrun=23.7 um/s, STD_Vrun=8.7, Vx=1.3 um/s,
TotalCells=4075,										TotalCells=4045,										TotalCells=4216,										TotalCells=4089,
CWbias=0.20, Vrun=19.0um/s, STD_Vrun=8.5, Vx=0.1um/s, Vy=-0.1um/s										CWbias=0.25, Vrun=22.2um/s, STD_Vrun=9.6, Vx=-0.1um/s, Vy=0.1um/s										CWbias=0.22, Vrun=21.7um/s, STD_Vrun=9.0, Vx=-0.0um/s, Vy=-0.3um/s										CWbias=0.20, Vrun=22.6um/s, STD_Vrun=9.0, Vx=-0.0um/s, Vy=-0.3um/s
Run duration: fitting exp(t/Tau)=0.13 s, CWbias_LEFT=0.20, CWbias_RIGHT=0.20,										Run duration: fitting exp(t/Tau)=0.12 s, CWbias_LEFT=0.25, CWbias_RIGHT=0.26,										Run duration: fitting exp(t/Tau)=0.13 s, CWbias_LEFT=0.22, CWbias_RIGHT=0.22,										Run duration: fitting exp(t/Tau)=0.12 s, CWbias_LEFT=0.20, CWbias_RIGHT=0.20,
Tumble duration: fitting exp(t/Tau)=0.02 s										Tumble duration: fitting exp(t/Tau)=0.02 s										Tumble duration: fitting exp(t/Tau)=0.02 s										Tumble duration: fitting exp(t/Tau)=0.02 s
MEAN tumble angle_LEFT=68.48, MEAN tumble angle_RIGHT=64.69, Dr=1.02 rad^2/s										MEAN tumble angle_LEFT=76.12, MEAN tumble angle_RIGHT=73.13, Dr=0.76 rad^2/s										MEAN tumble angle_LEFT=71.78, MEAN tumble angle_RIGHT=69.37, Dr=0.77 rad^2/s										MEAN tumble angle_LEFT=70.28, MEAN tumble angle_RIGHT=66.96, Dr=0.57 rad^2/s
>>										>>										>>										>>
1000 µM 2Dg
0-3 min										5-8 min										10-13 min										15-18 min
incompleteRuns =										incompleteRuns =										incompleteRuns =										incompleteRuns =
no										no										no										no
Movie=0X.txt, Cells=137, CWbias=0.22, Vrun=18.4 um/s, STD_Vrun=8.8, Vx=0.1 um/s,										Movie=0X.txt, Cells=142, CWbias=0.21, Vrun=18.1 um/s, STD_Vrun=7.3, Vx=-0.3 um/s,										Movie=0X.txt, Cells=201, CWbias=0.18, Vrun=19.3 um/s, STD_Vrun=7.7, Vx=-0.1 um/s,										Movie=0X.txt, Cells=179, CWbias=0.21, Vrun=19.3 um/s, STD_Vrun=9.1, Vx=-0.6 um/s,
Movie=10X.txt, Cells=201, CWbias=0.17, Vrun=17.3 um/s, STD_Vrun=7.4, Vx=0.0 um/s,										Movie=10X.txt, Cells=167, CWbias=0.23, Vrun=18.8 um/s, STD_Vrun=8.1, Vx=0.2 um/s,										Movie=10X.txt, Cells=126, CWbias=0.24, Vrun=18.3 um/s, STD_Vrun=7.6, Vx=-0.2 um/s,										Movie=10X.txt, Cells=161, CWbias=0.19, Vrun=17.5 um/s, STD_Vrun=7.0, Vx=0.9 um/s,
Movie=11X.txt, Cells=200, CWbias=0.19, Vrun=17.9 um/s, STD_Vrun=7.9, Vx=-1.4 um/s,										Movie=11X.txt, Cells=179, CWbias=0.18, Vrun=19.5 um/s, STD_Vrun=8.6, Vx=1.3 um/s,										Movie=11X.txt, Cells=177, CWbias=0.18, Vrun=18.3 um/s, STD_Vrun=7.3, Vx=0.3 um/s,										Movie=12X.txt, Cells=143, CWbias=0.23, Vrun=16.8 um/s, STD_Vrun=6.6, Vx=0.0 um/s,
Movie=12X.txt, Cells=112, CWbias=0.19, Vrun=17.5 um/s, STD_Vrun=7.7, Vx=-0.9 um/s,										Movie=12X.txt, Cells=133, CWbias=0.20, Vrun=20.0 um/s, STD_Vrun=8.8, Vx=1.2 um/s,										Movie=12X.txt, Cells=178, CWbias=0.20, Vrun=18.1 um/s, STD_Vrun=8.2, Vx=-0.7 um/s,										Movie=13X.txt, Cells=151, CWbias=0.20, Vrun=18.0 um/s, STD_Vrun=7.7, Vx=-0.6 um/s,
Movie=13X.txt, Cells=143, CWbias=0.33, Vrun=17.2 um/s, STD_Vrun=8.6, Vx=0.0 um/s,										Movie=13X.txt, Cells=168, CWbias=0.19, Vrun=19.4 um/s, STD_Vrun=8.5, Vx=0.5 um/s,										Movie=13X.txt, Cells=189, CWbias=0.16, Vrun=18.6 um/s, STD_Vrun=7.1, Vx=0.5 um/s,										Movie=14X.txt, Cells=134, CWbias=0.22, Vrun=17.2 um/s, STD_Vrun=7.8, Vx=-0.3 um/s,
Movie=14X.txt, Cells= 92, CWbias=0.27, Vrun=16.4 um/s, STD_Vrun=9.1, Vx=0.5 um/s,										Movie=14X.txt, Cells=204, CWbias=0.20, Vrun=20.3 um/s, STD_Vrun=9.2, Vx=1.5 um/s,										Movie=14X.txt, Cells=145, CWbias=0.19, Vrun=17.9 um/s, STD_Vrun=6.7, Vx=-0.9 um/s,										Movie=15X.txt, Cells=148, CWbias=0.20, Vrun=17.3 um/s, STD_Vrun=6.9, Vx=-0.5 um/s,
Movie=15X.txt, Cells=141, CWbias=0.27, Vrun=17.5 um/s, STD_Vrun=8.5, Vx=-0.9 um/s,										Movie=15X.txt, Cells=191, CWbias=0.24, Vrun=19.9 um/s, STD_Vrun=9.8, Vx=0.7 um/s,										Movie=15X.txt, Cells=140, CWbias=0.18, Vrun=18.4 um/s, STD_Vrun=7.6, Vx=0.6 um/s,										Movie=1X.txt, Cells=146, CWbias=0.19, Vrun=18.9 um/s, STD_Vrun=8.1, Vx=-0.3 um/s,
Movie=1X.txt, Cells=114, CWbias=0.19, Vrun=17.4 um/s, STD_Vrun=7.4, Vx=0.9 um/s,										Movie=1X.txt, Cells=206, CWbias=0.20, Vrun=18.9 um/s, STD_Vrun=8.1, Vx=-0.6 um/s,										Movie=1X.txt, Cells=191, CWbias=0.17, Vrun=18.7 um/s, STD_Vrun=8.0, Vx=0.2 um/s,										Movie=20X.txt, Cells=154, CWbias=0.20, Vrun=17.9 um/s, STD_Vrun=8.9, Vx=8.8 um/s,
Movie=20X.txt, Cells=144, CWbias=0.26, Vrun=17.8 um/s, STD_Vrun=8.9, Vx=-0.6 um/s,										Movie=20X.txt, Cells=236, CWbias=0.31, Vrun=17.2 um/s, STD_Vrun=9.3, Vx=-0.5 um/s,										Movie=20X.txt, Cells=200, CWbias=0.22, Vrun=18.3 um/s, STD_Vrun=8.3, Vx=-2.0 um/s,										Movie=21X.txt, Cells=158, CWbias=0.19, Vrun=18.7 um/s, STD_Vrun=8.0, Vx=1.1 um/s,
Movie=21X.txt, Cells= 96, CWbias=0.25, Vrun=17.2 um/s, STD_Vrun=7.3, Vx=0.0 um/s,										Movie=21X.txt, Cells=190, CWbias=0.28, Vrun=17.3 um/s, STD_Vrun=8.7, Vx=-0.1 um/s,										Movie=21X.txt, Cells=188, CWbias=0.29, Vrun=17.9 um/s, STD_Vrun=8.9, Vx=-0.5 um/s,										Movie=22X.txt, Cells=142, CWbias=0.18, Vrun=17.8 um/s, STD_Vrun=6.9, Vx=-1.4 um/s,
Movie=22X.txt, Cells= 76, CWbias=0.26, Vrun=18.1 um/s, STD_Vrun=9.0, Vx=-0.7 um/s,										Movie=22X.txt, Cells=202, CWbias=0.32, Vrun=16.9 um/s, STD_Vrun=9.7, Vx=-0.8 um/s,										Movie=22X.txt, Cells=176, CWbias=0.25, Vrun=17.6 um/s, STD_Vrun=8.3, Vx=-0.0 um/s,										Movie=23X.txt, Cells=152, CWbias=0.20, Vrun=17.8 um/s, STD_Vrun=7.7, Vx=0.0 um/s,
Movie=23X.txt, Cells=130, CWbias=0.27, Vrun=18.0 um/s, STD_Vrun=8.7, Vx=-1.3 um/s,										Movie=23X.txt, Cells=190, CWbias=0.31, Vrun=16.7 um/s, STD_Vrun=8.7, Vx=0.5 um/s,										Movie=23X.txt, Cells=211, CWbias=0.26, Vrun=17.7 um/s, STD_Vrun=8.5, Vx=0.3 um/s,										Movie=24X.txt, Cells=190, CWbias=0.22, Vrun=18.1 um/s, STD_Vrun=8.5, Vx=0.1 um/s,
Movie=24X.txt, Cells=126, CWbias=0.23, Vrun=19.6 um/s, STD_Vrun=10.1, Vx=-1.0 um/s,										Movie=24X.txt, Cells=246, CWbias=0.36, Vrun=17.4 um/s, STD_Vrun=10.2, Vx=0.4 um/s,										Movie=24X.txt, Cells=173, CWbias=0.29, Vrun=17.8 um/s, STD_Vrun=9.7, Vx=-0.9 um/s,										Movie=25X.txt, Cells=180, CWbias=0.18, Vrun=17.7 um/s, STD_Vrun=7.5, Vx=-0.5 um/s,
Movie=25X.txt, Cells=163, CWbias=0.26, Vrun=19.1 um/s, STD_Vrun=9.5, Vx=0.1 um/s,										Movie=25X.txt, Cells=146, CWbias=0.38, Vrun=16.3 um/s, STD_Vrun=9.7, Vx=-0.2 um/s,										Movie=25X.txt, Cells=141, CWbias=0.23, Vrun=17.3 um/s, STD_Vrun=7.2, Vx=-0.8 um/s,										Movie=2X.txt, Cells=167, CWbias=0.17, Vrun=19.4 um/s, STD_Vrun=8.3, Vx=-0.3 um/s,
Movie=2X.txt, Cells=162, CWbias=0.28, Vrun=17.6 um/s, STD_Vrun=8.7, Vx=-0.4 um/s,										Movie=2X.txt, Cells=180, CWbias=0.26, Vrun=18.3 um/s, STD_Vrun=8.5, Vx=-0.4 um/s,										Movie=2X.txt, Cells=181, CWbias=0.19, Vrun=19.5 um/s, STD_Vrun=8.5, Vx=0.8 um/s,										Movie=30X.txt, Cells=115, CWbias=0.24, Vrun=17.9 um/s, STD_Vrun=8.8, Vx=-0.3 um/s,
Movie=30X.txt, Cells=163, CWbias=0.20, Vrun=15.3 um/s, STD_Vrun=6.2, Vx=0.1 um/s,										Movie=30X.txt, Cells=115, CWbias=0.27, Vrun=16.9 um/s, STD_Vrun=8.1, Vx=-0.1 um/s,										Movie=30X.txt, Cells= 94, CWbias=0.37, Vrun=16.6 um/s, STD_Vrun=7.8, Vx=0.0 um/s,										Movie=31X.txt, Cells= 99, CWbias=0.20, Vrun=17.2 um/s, STD_Vrun=7.9, Vx=-1.3 um/s,
Movie=31X.txt, Cells=191, CWbias=0.16, Vrun=17.1 um/s, STD_Vrun=7.7, Vx=-0.4 um/s,										Movie=31X.txt, Cells=110, CWbias=0.30, Vrun=16.8 um/s, STD_Vrun=8.7, Vx=-1.0 um/s,										Movie=31X.txt, Cells= 90, CWbias=0.26, Vrun=17.1 um/s, STD_Vrun=7.8, Vx=-0.4 um/s,										Movie=32X.txt, Cells=124, CWbias=0.22, Vrun=17.6 um/s, STD_Vrun=8.0, Vx=0.6 um/s,
Movie=32X.txt, Cells=146, CWbias=0.20, Vrun=16.7 um/s, STD_Vrun=7.6, Vx=0.1 um/s,										Movie=32X.txt, Cells=133, CWbias=0.27, Vrun=17.8 um/s, STD_Vrun=9.4, Vx=0.7 um/s,										Movie=32X.txt, Cells= 99, CWbias=0.25, Vrun=17.1 um/s, STD_Vrun=6.7, Vx=-1.9 um/s,										Movie=33X.txt, Cells=124, CWbias=0.22, Vrun=17.0 um/s, STD_Vrun=7.6, Vx=0.4 um/s,
Movie=33X.txt, Cells=100, CWbias=0.22, Vrun=16.5 um/s, STD_Vrun=7.3, Vx=0.4 um/s,										Movie=33X.txt, Cells=105, CWbias=0.24, Vrun=18.4 um/s, STD_Vrun=9.2, Vx=-1.1 um/s,										Movie=33X.txt, Cells=107, CWbias=0.19, Vrun=18.5 um/s, STD_Vrun=9.2, Vx=-0.6 um/s,										Movie=34X.txt, Cells=118, CWbias=0.20, Vrun=17.8 um/s, STD_Vrun=7.9, Vx=0.3 um/s,
Movie=34X.txt, Cells=146, CWbias=0.24, Vrun=15.9 um/s, STD_Vrun=7.2, Vx=0.2 um/s,										Movie=34X.txt, Cells= 97, CWbias=0.25, Vrun=18.5 um/s, STD_Vrun=8.9, Vx=1.3 um/s,										Movie=34X.txt, Cells=110, CWbias=0.28, Vrun=16.2 um/s, STD_Vrun=7.0, Vx=0.9 um/s,										Movie=35X.txt, Cells= 81, CWbias=0.27, Vrun=16.9 um/s, STD_Vrun=8.3, Vx=1.8 um/s,
Movie=35X.txt, Cells= 77, CWbias=0.26, Vrun=17.7 um/s, STD_Vrun=8.4, Vx=0.6 um/s,										Movie=35X.txt, Cells=111, CWbias=0.24, Vrun=17.9 um/s, STD_Vrun=8.8, Vx=-0.8 um/s,										Movie=35X.txt, Cells=173, CWbias=0.25, Vrun=18.1 um/s, STD_Vrun=8.7, Vx=0.3 um/s,										Movie=3X.txt, Cells=201, CWbias=0.19, Vrun=18.9 um/s, STD_Vrun=8.1, Vx=0.9 um/s,
Movie=3X.txt, Cells=156, CWbias=0.23, Vrun=18.6 um/s, STD_Vrun=8.7, Vx=0.5 um/s,										Movie=3X.txt, Cells=136, CWbias=0.20, Vrun=18.7 um/s, STD_Vrun=7.9, Vx=0.1 um/s,										Movie=3X.txt, Cells=180, CWbias=0.19, Vrun=18.8 um/s, STD_Vrun=7.9, Vx=0.3 um/s,										Movie=4X.txt, Cells=182, CWbias=0.18, Vrun=19.3 um/s, STD_Vrun=8.5, Vx=-0.7 um/s,
Movie=4X.txt, Cells=134, CWbias=0.22, Vrun=18.5 um/s, STD_Vrun=8.5, Vx=0.4 um/s,										Movie=4X.txt, Cells=151, CWbias=0.20, Vrun=18.5 um/s, STD_Vrun=7.9, Vx=1.1 um/s,										Movie=4X.txt, Cells=198, CWbias=0.16, Vrun=18.4 um/s, STD_Vrun=7.3, Vx=-0.3 um/s,										Movie=5X.txt, Cells=154, CWbias=0.19, Vrun=18.7 um/s, STD_Vrun=7.7, Vx=0.6 um/s,
Movie=5X.txt, Cells=188, CWbias=0.28, Vrun=19.6 um/s, STD_Vrun=9.7, Vx=0.3 um/s,										Movie=5X.txt, Cells=131, CWbias=0.26, Vrun=18.4 um/s, STD_Vrun=8.8, Vx=0.2 um/s,										Movie=5X.txt, Cells=182, CWbias=0.20, Vrun=19.1 um/s, STD_Vrun=8.5, Vx=-1.1 um/s,										TotalCells=3403,
TotalCells=3338,										TotalCells=3869,										TotalCells=3850,										CWbias=0.20, Vrun=18.1um/s, STD_Vrun=7.9, Vx=0.3um/s, Vy=-0.2um/s
CWbias=0.23, Vrun=17.6um/s, STD_Vrun=8.3, Vx=-0.1um/s, Vy=0.3um/s										CWbias=0.25, Vrun=18.3um/s, STD_Vrun=8.9, Vx=0.2um/s, Vy=-0.2um/s										CWbias=0.22, Vrun=18.2um/s, STD_Vrun=8.0, Vx=-0.2um/s, Vy=-0.0um/s										Run duration: fitting exp(t/Tau)=0.15 s, CWbias_LEFT=0.21, CWbias_RIGHT=0.20,
Run duration: fitting exp(t/Tau)=0.13 s, CWbias_LEFT=0.23, CWbias_RIGHT=0.23,										Run duration: fitting exp(t/Tau)=0.13 s, CWbias_LEFT=0.26, CWbias_RIGHT=0.25,										Run duration: fitting exp(t/Tau)=0.14 s, CWbias_LEFT=0.22, CWbias_RIGHT=0.22,										Tumble duration: fitting exp(t/Tau)=0.02 s
Tumble duration: fitting exp(t/Tau)=0.02 s										Tumble duration: fitting exp(t/Tau)=0.02 s										Tumble duration: fitting exp(t/Tau)=0.02 s										MEAN tumble angle_LEFT=75.15, MEAN tumble angle_RIGHT=71.97, Dr=1.49 rad^2/s
MEAN tumble angle_LEFT=73.59, MEAN tumble angle_RIGHT=71.60, Dr=1.49 rad^2/s										MEAN tumble angle_LEFT=78.01, MEAN tumble angle_RIGHT=75.65, Dr=1.48 rad^2/s										MEAN tumble angle_LEFT=76.90, MEAN tumble angle_RIGHT=73.80, Dr=1.50 rad^2/s										>>
>>										>>										>>

## Sheet: Figure 4(F)_ cheY mutant
								ΔcheY RP437 average run speed
Motility buffer
0-3 min									5-8 min									10-13 min									15-18 min
incompleteRuns =									incompleteRuns =									incompleteRuns =									incompleteRuns =
no									no									no									no
Movie=1X.txt, Cells=202, CWbias=0.12, Vrun=18.3 um/s, STD_Vrun=6.4, Vx=0.8 um/s,									Movie=10X.txt, Cells=304, CWbias=0.16, Vrun=20.7 um/s, STD_Vrun=8.2, Vx=-0.2 um/s,									Movie=0X.txt, Cells=316, CWbias=0.11, Vrun=23.7 um/s, STD_Vrun=9.0, Vx=1.3 um/s,									Movie=0X.txt, Cells=304, CWbias=0.08, Vrun=21.2 um/s, STD_Vrun=8.1, Vx=0.8 um/s,
Movie=23X.txt, Cells=346, CWbias=0.11, Vrun=20.2 um/s, STD_Vrun=8.0, Vx=-0.3 um/s,									Movie=11X.txt, Cells=325, CWbias=0.12, Vrun=20.6 um/s, STD_Vrun=7.8, Vx=0.3 um/s,									Movie=10X.txt, Cells=377, CWbias=0.12, Vrun=23.2 um/s, STD_Vrun=8.9, Vx=0.3 um/s,									Movie=10X.txt, Cells=285, CWbias=0.12, Vrun=18.3 um/s, STD_Vrun=7.0, Vx=0.9 um/s,
Movie=24X.txt, Cells=408, CWbias=0.15, Vrun=20.3 um/s, STD_Vrun=8.2, Vx=0.3 um/s,									Movie=12X.txt, Cells=262, CWbias=0.10, Vrun=21.3 um/s, STD_Vrun=7.8, Vx=-1.3 um/s,									Movie=11X.txt, Cells=295, CWbias=0.16, Vrun=21.8 um/s, STD_Vrun=7.8, Vx=-0.4 um/s,									Movie=11X.txt, Cells=226, CWbias=0.12, Vrun=18.0 um/s, STD_Vrun=7.5, Vx=-0.1 um/s,
Movie=25X.txt, Cells=331, CWbias=0.13, Vrun=19.4 um/s, STD_Vrun=7.6, Vx=0.3 um/s,									Movie=14X.txt, Cells=265, CWbias=0.10, Vrun=21.3 um/s, STD_Vrun=7.7, Vx=-0.6 um/s,									Movie=12X.txt, Cells=385, CWbias=0.09, Vrun=22.0 um/s, STD_Vrun=7.3, Vx=-0.3 um/s,									Movie=13X.txt, Cells=343, CWbias=0.13, Vrun=18.0 um/s, STD_Vrun=7.9, Vx=0.3 um/s,
Movie=26X.txt, Cells=363, CWbias=0.12, Vrun=19.1 um/s, STD_Vrun=7.5, Vx=-0.3 um/s,									Movie=1X.txt, Cells=250, CWbias=0.13, Vrun=20.7 um/s, STD_Vrun=7.5, Vx=-0.2 um/s,									Movie=14X.txt, Cells=333, CWbias=0.16, Vrun=19.4 um/s, STD_Vrun=6.6, Vx=0.1 um/s,									Movie=14X.txt, Cells=289, CWbias=0.13, Vrun=17.8 um/s, STD_Vrun=6.8, Vx=0.1 um/s,
Movie=2X.txt, Cells=204, CWbias=0.17, Vrun=19.3 um/s, STD_Vrun=7.4, Vx=1.2 um/s,									Movie=20X.txt, Cells=315, CWbias=0.13, Vrun=21.7 um/s, STD_Vrun=7.9, Vx=1.2 um/s,									Movie=1X.txt, Cells=287, CWbias=0.08, Vrun=22.6 um/s, STD_Vrun=8.1, Vx=0.6 um/s,									Movie=15X.txt, Cells=351, CWbias=0.12, Vrun=17.2 um/s, STD_Vrun=6.0, Vx=0.0 um/s,
Movie=30X.txt, Cells=131, CWbias=0.07, Vrun=20.1 um/s, STD_Vrun=6.1, Vx=1.3 um/s,									Movie=21X.txt, Cells=250, CWbias=0.13, Vrun=20.4 um/s, STD_Vrun=7.6, Vx=0.3 um/s,									Movie=21X.txt, Cells=184, CWbias=0.15, Vrun=23.0 um/s, STD_Vrun=8.2, Vx=-0.5 um/s,									Movie=1X.txt, Cells=316, CWbias=0.09, Vrun=22.4 um/s, STD_Vrun=7.9, Vx=0.1 um/s,
Movie=31X.txt, Cells=214, CWbias=0.14, Vrun=19.0 um/s, STD_Vrun=7.3, Vx=1.1 um/s,									Movie=22X.txt, Cells=206, CWbias=0.19, Vrun=22.0 um/s, STD_Vrun=8.5, Vx=-0.3 um/s,									Movie=22X.txt, Cells=324, CWbias=0.12, Vrun=22.7 um/s, STD_Vrun=8.5, Vx=-1.2 um/s,									Movie=20X.txt, Cells=337, CWbias=0.09, Vrun=18.7 um/s, STD_Vrun=6.4, Vx=0.1 um/s,
Movie=32X.txt, Cells=255, CWbias=0.16, Vrun=18.6 um/s, STD_Vrun=7.4, Vx=0.4 um/s,									Movie=23X.txt, Cells=307, CWbias=0.14, Vrun=21.1 um/s, STD_Vrun=7.9, Vx=0.3 um/s,									Movie=23X.txt, Cells=299, CWbias=0.13, Vrun=20.6 um/s, STD_Vrun=6.9, Vx=-0.4 um/s,									Movie=21X.txt, Cells=392, CWbias=0.10, Vrun=19.1 um/s, STD_Vrun=7.0, Vx=0.7 um/s,
Movie=33X.txt, Cells=260, CWbias=0.14, Vrun=19.9 um/s, STD_Vrun=7.8, Vx=0.4 um/s,									Movie=25X.txt, Cells=239, CWbias=0.11, Vrun=20.9 um/s, STD_Vrun=7.5, Vx=-0.1 um/s,									Movie=24X.txt, Cells=259, CWbias=0.12, Vrun=19.7 um/s, STD_Vrun=6.8, Vx=0.6 um/s,									Movie=22X.txt, Cells=343, CWbias=0.13, Vrun=18.5 um/s, STD_Vrun=7.0, Vx=0.1 um/s,
Movie=34X.txt, Cells=188, CWbias=0.11, Vrun=21.0 um/s, STD_Vrun=7.6, Vx=-0.3 um/s,									Movie=2X.txt, Cells=287, CWbias=0.11, Vrun=21.3 um/s, STD_Vrun=7.4, Vx=-0.3 um/s,									Movie=25X.txt, Cells=265, CWbias=0.15, Vrun=19.2 um/s, STD_Vrun=6.1, Vx=-0.3 um/s,									Movie=23X.txt, Cells=378, CWbias=0.11, Vrun=18.5 um/s, STD_Vrun=6.9, Vx=0.7 um/s,
Movie=35X.txt, Cells=238, CWbias=0.12, Vrun=19.9 um/s, STD_Vrun=7.5, Vx=-0.1 um/s,									Movie=3X.txt, Cells=202, CWbias=0.13, Vrun=21.5 um/s, STD_Vrun=7.5, Vx=-0.0 um/s,									Movie=2X.txt, Cells=265, CWbias=0.11, Vrun=24.1 um/s, STD_Vrun=8.7, Vx=0.5 um/s,									Movie=24X.txt, Cells=356, CWbias=0.11, Vrun=17.8 um/s, STD_Vrun=6.1, Vx=0.6 um/s,
Movie=4X.txt, Cells=225, CWbias=0.12, Vrun=19.3 um/s, STD_Vrun=7.4, Vx=0.7 um/s,									Movie=4X.txt, Cells=316, CWbias=0.10, Vrun=21.1 um/s, STD_Vrun=7.4, Vx=-0.1 um/s,									Movie=3X.txt, Cells=309, CWbias=0.05, Vrun=25.7 um/s, STD_Vrun=8.4, Vx=0.4 um/s,									Movie=25X.txt, Cells=311, CWbias=0.13, Vrun=18.1 um/s, STD_Vrun=6.7, Vx=-0.8 um/s,
Movie=5X.txt, Cells=240, CWbias=0.09, Vrun=20.4 um/s, STD_Vrun=7.1, Vx=0.9 um/s,									Movie=5X.txt, Cells=221, CWbias=0.13, Vrun=21.3 um/s, STD_Vrun=8.5, Vx=0.5 um/s,									Movie=4X.txt, Cells=399, CWbias=0.07, Vrun=24.2 um/s, STD_Vrun=8.4, Vx=-0.6 um/s,									Movie=2X.txt, Cells=347, CWbias=0.07, Vrun=21.5 um/s, STD_Vrun=7.9, Vx=0.8 um/s,
TotalCells=3605,									TotalCells=3749,									Movie=5X.txt, Cells=383, CWbias=0.09, Vrun=22.9 um/s, STD_Vrun=7.8, Vx=0.2 um/s,									Movie=3X.txt, Cells=276, CWbias=0.09, Vrun=21.2 um/s, STD_Vrun=7.5, Vx=0.4 um/s,
CWbias=0.13, Vrun=19.6um/s, STD_Vrun=7.5, Vx=0.4um/s, Vy=-0.3um/s									CWbias=0.13, Vrun=21.1um/s, STD_Vrun=7.8, Vx=-0.0um/s, Vy=0.0um/s									TotalCells=4680,									Movie=4X.txt, Cells=349, CWbias=0.06, Vrun=20.8 um/s, STD_Vrun=7.3, Vx=-0.4 um/s,
Run duration: fitting exp(t/Tau)=0.14 s, CWbias_LEFT=0.13, CWbias_RIGHT=0.12,									Run duration: fitting exp(t/Tau)=0.14 s, CWbias_LEFT=0.13, CWbias_RIGHT=0.13,									CWbias=0.11, Vrun=22.4um/s, STD_Vrun=8.1, Vx=0.0um/s, Vy=0.1um/s									Movie=5X.txt, Cells=443, CWbias=0.06, Vrun=19.5 um/s, STD_Vrun=6.4, Vx=0.3 um/s,
Tumble duration: fitting exp(t/Tau)=0.01 s									Tumble duration: fitting exp(t/Tau)=0.01 s									Run duration: fitting exp(t/Tau)=0.12 s, CWbias_LEFT=0.11, CWbias_RIGHT=0.11,									Movie=6X.txt, Cells=292, CWbias=0.06, Vrun=20.0 um/s, STD_Vrun=6.7, Vx=0.4 um/s,
MEAN tumble angle_LEFT=53.19, MEAN tumble angle_RIGHT=51.40, Dr=0.90 rad^2/s									MEAN tumble angle_LEFT=52.01, MEAN tumble angle_RIGHT=50.47, Dr=0.69 rad^2/s									Tumble duration: fitting exp(t/Tau)=0.01 s									TotalCells=5938,
																		MEAN tumble angle_LEFT=48.50, MEAN tumble angle_RIGHT=46.31, Dr=0.60 rad^2/s									CWbias=0.10, Vrun=19.3um/s, STD_Vrun=7.2, Vx=0.3um/s, Vy=-0.0um/s
																											Run duration: fitting exp(t/Tau)=0.14 s, CWbias_LEFT=0.10, CWbias_RIGHT=0.10,
																											Tumble duration: fitting exp(t/Tau)=0.01 s
																											MEAN tumble angle_LEFT=48.94, MEAN tumble angle_RIGHT=46.44, Dr=0.78 rad^2/s
1000 µM Glucose
0-3 min									5-8 min									10-13 min									15-18 min
incompleteRuns =									incompleteRuns =									incompleteRuns =									incompleteRuns =
no									no									no									no
Movie=0X.txt, Cells=259, CWbias=0.05, Vrun=24.5 um/s, STD_Vrun=8.6, Vx=0.9 um/s,									Movie=0X.txt, Cells=228, CWbias=0.05, Vrun=27.5 um/s, STD_Vrun=8.5, Vx=0.5 um/s,									Movie=0X.txt, Cells=359, CWbias=0.08, Vrun=29.8 um/s, STD_Vrun=9.4, Vx=0.3 um/s,									Movie=0X.txt, Cells=468, CWbias=0.08, Vrun=29.9 um/s, STD_Vrun=9.7, Vx=-0.4 um/s,
Movie=10X.txt, Cells=309, CWbias=0.18, Vrun=18.5 um/s, STD_Vrun=6.6, Vx=0.3 um/s,									Movie=10X.txt, Cells=381, CWbias=0.12, Vrun=24.4 um/s, STD_Vrun=8.3, Vx=-0.4 um/s,									Movie=10X.txt, Cells=450, CWbias=0.16, Vrun=27.2 um/s, STD_Vrun=9.2, Vx=0.6 um/s,									Movie=10X.txt, Cells=485, CWbias=0.12, Vrun=28.9 um/s, STD_Vrun=9.3, Vx=0.3 um/s,
Movie=11X.txt, Cells=350, CWbias=0.26, Vrun=19.6 um/s, STD_Vrun=8.7, Vx=-0.1 um/s,									Movie=11X.txt, Cells=404, CWbias=0.12, Vrun=25.0 um/s, STD_Vrun=9.0, Vx=0.6 um/s,									Movie=11X.txt, Cells=419, CWbias=0.14, Vrun=27.1 um/s, STD_Vrun=9.5, Vx=-0.8 um/s,									Movie=11X.txt, Cells=511, CWbias=0.14, Vrun=27.5 um/s, STD_Vrun=9.6, Vx=1.0 um/s,
Movie=12X.txt, Cells=291, CWbias=0.20, Vrun=18.7 um/s, STD_Vrun=7.1, Vx=-0.0 um/s,									Movie=12X.txt, Cells=408, CWbias=0.14, Vrun=25.6 um/s, STD_Vrun=9.5, Vx=0.0 um/s,									Movie=12X.txt, Cells=429, CWbias=0.15, Vrun=27.5 um/s, STD_Vrun=9.7, Vx=-0.3 um/s,									Movie=12X.txt, Cells=535, CWbias=0.12, Vrun=28.5 um/s, STD_Vrun=9.7, Vx=0.3 um/s,
Movie=13X.txt, Cells=324, CWbias=0.20, Vrun=19.8 um/s, STD_Vrun=8.4, Vx=0.4 um/s,									Movie=13X.txt, Cells=474, CWbias=0.11, Vrun=26.6 um/s, STD_Vrun=9.2, Vx=-0.8 um/s,									Movie=13X.txt, Cells=330, CWbias=0.16, Vrun=27.3 um/s, STD_Vrun=9.0, Vx=-0.3 um/s,									Movie=13X.txt, Cells=559, CWbias=0.12, Vrun=29.1 um/s, STD_Vrun=9.5, Vx=0.6 um/s,
Movie=14X.txt, Cells=301, CWbias=0.17, Vrun=19.8 um/s, STD_Vrun=8.3, Vx=0.4 um/s,									Movie=14X.txt, Cells=410, CWbias=0.16, Vrun=25.8 um/s, STD_Vrun=9.4, Vx=-0.4 um/s,									Movie=14X.txt, Cells=438, CWbias=0.14, Vrun=27.2 um/s, STD_Vrun=9.3, Vx=-0.4 um/s,									Movie=14X.txt, Cells=484, CWbias=0.10, Vrun=29.1 um/s, STD_Vrun=9.2, Vx=-0.7 um/s,
Movie=15X.txt, Cells=354, CWbias=0.14, Vrun=20.1 um/s, STD_Vrun=8.0, Vx=0.2 um/s,									Movie=15X.txt, Cells=467, CWbias=0.14, Vrun=25.9 um/s, STD_Vrun=9.7, Vx=1.3 um/s,									Movie=15X.txt, Cells=409, CWbias=0.11, Vrun=28.9 um/s, STD_Vrun=9.2, Vx=-1.6 um/s,									Movie=15X.txt, Cells=428, CWbias=0.15, Vrun=27.9 um/s, STD_Vrun=9.4, Vx=0.2 um/s,
Movie=1X.txt, Cells=237, CWbias=0.05, Vrun=26.0 um/s, STD_Vrun=8.1, Vx=-0.5 um/s,									Movie=20X.txt, Cells=279, CWbias=0.18, Vrun=24.5 um/s, STD_Vrun=9.4, Vx=0.6 um/s,									Movie=1X.txt, Cells=372, CWbias=0.07, Vrun=29.0 um/s, STD_Vrun=9.4, Vx=1.2 um/s,									Movie=1X.txt, Cells=448, CWbias=0.10, Vrun=29.4 um/s, STD_Vrun=9.7, Vx=-0.9 um/s,
Movie=20X.txt, Cells=307, CWbias=0.15, Vrun=20.9 um/s, STD_Vrun=7.6, Vx=0.9 um/s,									Movie=21X.txt, Cells=337, CWbias=0.12, Vrun=25.1 um/s, STD_Vrun=8.6, Vx=-0.0 um/s,									Movie=20X.txt, Cells=393, CWbias=0.15, Vrun=27.7 um/s, STD_Vrun=9.5, Vx=0.2 um/s,									Movie=20X.txt, Cells=459, CWbias=0.09, Vrun=31.4 um/s, STD_Vrun=9.9, Vx=-1.1 um/s,
Movie=21X.txt, Cells=310, CWbias=0.14, Vrun=20.6 um/s, STD_Vrun=8.0, Vx=0.6 um/s,									Movie=22X.txt, Cells=373, CWbias=0.14, Vrun=25.6 um/s, STD_Vrun=9.6, Vx=-1.4 um/s,									Movie=21X.txt, Cells=408, CWbias=0.15, Vrun=28.2 um/s, STD_Vrun=9.5, Vx=-0.1 um/s,									Movie=21X.txt, Cells=539, CWbias=0.11, Vrun=30.4 um/s, STD_Vrun=10.0, Vx=0.6 um/s,
Movie=22X.txt, Cells=260, CWbias=0.09, Vrun=21.4 um/s, STD_Vrun=7.7, Vx=0.1 um/s,									Movie=23X.txt, Cells=359, CWbias=0.18, Vrun=26.0 um/s, STD_Vrun=9.3, Vx=0.1 um/s,									Movie=22X.txt, Cells=397, CWbias=0.10, Vrun=28.7 um/s, STD_Vrun=10.0, Vx=1.3 um/s,									Movie=22X.txt, Cells=472, CWbias=0.08, Vrun=30.1 um/s, STD_Vrun=9.7, Vx=-0.2 um/s,
Movie=25X.txt, Cells=304, CWbias=0.13, Vrun=21.7 um/s, STD_Vrun=8.7, Vx=-0.4 um/s,									Movie=24X.txt, Cells=275, CWbias=0.20, Vrun=23.9 um/s, STD_Vrun=9.8, Vx=-0.6 um/s,									Movie=23X.txt, Cells=382, CWbias=0.10, Vrun=28.2 um/s, STD_Vrun=9.6, Vx=-0.1 um/s,									Movie=23X.txt, Cells=590, CWbias=0.13, Vrun=30.3 um/s, STD_Vrun=10.5, Vx=-0.1 um/s,
Movie=2X.txt, Cells=265, CWbias=0.06, Vrun=24.7 um/s, STD_Vrun=8.1, Vx=-0.6 um/s,									Movie=25X.txt, Cells=338, CWbias=0.16, Vrun=25.8 um/s, STD_Vrun=9.2, Vx=-0.3 um/s,									Movie=24X.txt, Cells=438, CWbias=0.13, Vrun=29.5 um/s, STD_Vrun=10.2, Vx=-0.9 um/s,									Movie=24X.txt, Cells=522, CWbias=0.15, Vrun=30.2 um/s, STD_Vrun=9.9, Vx=0.0 um/s,
Movie=30X.txt, Cells=174, CWbias=0.18, Vrun=18.3 um/s, STD_Vrun=6.0, Vx=-0.6 um/s,									Movie=2X.txt, Cells=296, CWbias=0.07, Vrun=28.2 um/s, STD_Vrun=8.8, Vx=-2.1 um/s,									Movie=25X.txt, Cells=430, CWbias=0.13, Vrun=29.4 um/s, STD_Vrun=10.5, Vx=0.4 um/s,									Movie=25X.txt, Cells=562, CWbias=0.11, Vrun=31.1 um/s, STD_Vrun=10.0, Vx=-0.1 um/s,
Movie=31X.txt, Cells=102, CWbias=0.19, Vrun=18.3 um/s, STD_Vrun=6.2, Vx=-0.3 um/s,									Movie=30X.txt, Cells=208, CWbias=0.13, Vrun=23.7 um/s, STD_Vrun=8.4, Vx=0.7 um/s,									Movie=2X.txt, Cells=323, CWbias=0.12, Vrun=28.7 um/s, STD_Vrun=8.7, Vx=1.2 um/s,									Movie=2X.txt, Cells=419, CWbias=0.03, Vrun=31.8 um/s, STD_Vrun=9.2, Vx=-0.5 um/s,
Movie=32X.txt, Cells=138, CWbias=0.16, Vrun=19.7 um/s, STD_Vrun=6.8, Vx=-0.5 um/s,									Movie=31X.txt, Cells=188, CWbias=0.14, Vrun=24.8 um/s, STD_Vrun=8.8, Vx=0.9 um/s,									Movie=30X.txt, Cells=276, CWbias=0.10, Vrun=28.6 um/s, STD_Vrun=9.2, Vx=1.1 um/s,									Movie=30X.txt, Cells=280, CWbias=0.10, Vrun=28.5 um/s, STD_Vrun=8.5, Vx=0.2 um/s,
Movie=33X.txt, Cells=138, CWbias=0.13, Vrun=20.6 um/s, STD_Vrun=7.1, Vx=0.7 um/s,									Movie=32X.txt, Cells=206, CWbias=0.14, Vrun=24.8 um/s, STD_Vrun=8.7, Vx=2.8 um/s,									Movie=31X.txt, Cells=285, CWbias=0.11, Vrun=27.1 um/s, STD_Vrun=8.3, Vx=-0.6 um/s,									Movie=31X.txt, Cells=201, CWbias=0.11, Vrun=27.9 um/s, STD_Vrun=8.5, Vx=-1.3 um/s,
Movie=34X.txt, Cells=204, CWbias=0.12, Vrun=20.3 um/s, STD_Vrun=6.7, Vx=-0.6 um/s,									Movie=33X.txt, Cells=228, CWbias=0.14, Vrun=26.2 um/s, STD_Vrun=8.5, Vx=1.1 um/s,									Movie=32X.txt, Cells=318, CWbias=0.09, Vrun=28.7 um/s, STD_Vrun=8.3, Vx=-0.3 um/s,									Movie=32X.txt, Cells=271, CWbias=0.05, Vrun=30.4 um/s, STD_Vrun=8.3, Vx=-0.0 um/s,
Movie=35X.txt, Cells=156, CWbias=0.14, Vrun=21.1 um/s, STD_Vrun=8.1, Vx=0.7 um/s,									Movie=34X.txt, Cells=222, CWbias=0.11, Vrun=25.2 um/s, STD_Vrun=8.2, Vx=-0.4 um/s,									Movie=33X.txt, Cells=319, CWbias=0.11, Vrun=27.9 um/s, STD_Vrun=8.9, Vx=0.2 um/s,									Movie=33X.txt, Cells=253, CWbias=0.07, Vrun=28.2 um/s, STD_Vrun=7.8, Vx=1.2 um/s,
Movie=3X.txt, Cells=225, CWbias=0.06, Vrun=23.7 um/s, STD_Vrun=7.4, Vx=1.2 um/s,									Movie=35X.txt, Cells=229, CWbias=0.10, Vrun=27.4 um/s, STD_Vrun=8.7, Vx=0.2 um/s,									Movie=34X.txt, Cells=275, CWbias=0.10, Vrun=26.6 um/s, STD_Vrun=8.3, Vx=0.0 um/s,									Movie=34X.txt, Cells=346, CWbias=0.12, Vrun=26.9 um/s, STD_Vrun=8.8, Vx=0.0 um/s,
Movie=4X.txt, Cells=298, CWbias=0.08, Vrun=25.6 um/s, STD_Vrun=8.9, Vx=0.1 um/s,									Movie=3X.txt, Cells=275, CWbias=0.06, Vrun=28.0 um/s, STD_Vrun=8.0, Vx=0.8 um/s,									Movie=35X.txt, Cells=273, CWbias=0.13, Vrun=27.5 um/s, STD_Vrun=8.8, Vx=0.1 um/s,									Movie=35X.txt, Cells=230, CWbias=0.11, Vrun=28.1 um/s, STD_Vrun=8.3, Vx=0.5 um/s,
TotalCells=5306,									Movie=4X.txt, Cells=317, CWbias=0.13, Vrun=28.1 um/s, STD_Vrun=9.6, Vx=0.9 um/s,									Movie=3X.txt, Cells=431, CWbias=0.10, Vrun=28.4 um/s, STD_Vrun=9.2, Vx=1.1 um/s,									Movie=3X.txt, Cells=435, CWbias=0.07, Vrun=30.8 um/s, STD_Vrun=9.1, Vx=-1.1 um/s,
CWbias=0.14, Vrun=21.3um/s, STD_Vrun=8.2, Vx=0.2um/s, Vy=-0.0um/s									Movie=5X.txt, Cells=299, CWbias=0.09, Vrun=28.4 um/s, STD_Vrun=9.0, Vx=0.1 um/s,									Movie=4X.txt, Cells=364, CWbias=0.10, Vrun=30.2 um/s, STD_Vrun=8.9, Vx=-0.1 um/s,									Movie=4X.txt, Cells=444, CWbias=0.10, Vrun=30.7 um/s, STD_Vrun=9.3, Vx=-1.1 um/s,
Run duration: fitting exp(t/Tau)=0.13 s, CWbias_LEFT=0.15, CWbias_RIGHT=0.13,									TotalCells=7201,									Movie=5X.txt, Cells=381, CWbias=0.06, Vrun=29.8 um/s, STD_Vrun=9.2, Vx=0.7 um/s,									Movie=5X.txt, Cells=427, CWbias=0.05, Vrun=31.5 um/s, STD_Vrun=9.4, Vx=0.1 um/s,
Tumble duration: fitting exp(t/Tau)=0.01 s									CWbias=0.13, Vrun=26.0um/s, STD_Vrun=9.1, Vx=0.1um/s, Vy=-0.2um/s									TotalCells=8899,									TotalCells=10368,
MEAN tumble angle_LEFT=50.04, MEAN tumble angle_RIGHT=48.35, Dr=0.69 rad^2/s									Run duration: fitting exp(t/Tau)=0.11 s, CWbias_LEFT=0.13, CWbias_RIGHT=0.13,									CWbias=0.12, Vrun=28.4um/s, STD_Vrun=9.3, Vx=0.1um/s, Vy=-0.2um/s									CWbias=0.10, Vrun=29.6um/s, STD_Vrun=9.5, Vx=-0.1um/s, Vy=-0.2um/s
									Tumble duration: fitting exp(t/Tau)=0.01 s									Run duration: fitting exp(t/Tau)=0.10 s, CWbias_LEFT=0.12, CWbias_RIGHT=0.12,									Run duration: fitting exp(t/Tau)=0.11 s, CWbias_LEFT=0.10, CWbias_RIGHT=0.10,
									MEAN tumble angle_LEFT=48.86, MEAN tumble angle_RIGHT=45.72, Dr=0.43 rad^2/s									Tumble duration: fitting exp(t/Tau)=0.01 s									Tumble duration: fitting exp(t/Tau)=0.01 s
																		MEAN tumble angle_LEFT=48.44, MEAN tumble angle_RIGHT=44.98, Dr=0.39 rad^2/s									MEAN tumble angle_LEFT=50.76, MEAN tumble angle_RIGHT=46.89, Dr=0.36 rad^2/s
1000 µM 2Dg
0-3 min									5-8 min									10-13 min									15-18 min
incompleteRuns =									incompleteRuns =									incompleteRuns =									incompleteRuns =
no									no									no									no
Movie=0X.txt, Cells=212, CWbias=0.16, Vrun=20.2 um/s, STD_Vrun=7.6, Vx=-0.7 um/s,									Movie=0X.txt, Cells=203, CWbias=0.19, Vrun=24.6 um/s, STD_Vrun=8.3, Vx=1.2 um/s,									Movie=10X.txt, Cells=468, CWbias=0.07, Vrun=28.3 um/s, STD_Vrun=8.7, Vx=-0.3 um/s,									Movie=10X.txt, Cells=359, CWbias=0.07, Vrun=21.0 um/s, STD_Vrun=7.6, Vx=0.6 um/s,
Movie=10X.txt, Cells=265, CWbias=0.18, Vrun=20.0 um/s, STD_Vrun=8.1, Vx=1.2 um/s,									Movie=10X.txt, Cells=250, CWbias=0.12, Vrun=26.0 um/s, STD_Vrun=9.6, Vx=1.4 um/s,									Movie=11X.txt, Cells=462, CWbias=0.08, Vrun=27.5 um/s, STD_Vrun=9.1, Vx=-0.0 um/s,									Movie=11X.txt, Cells=399, CWbias=0.08, Vrun=20.4 um/s, STD_Vrun=7.4, Vx=-0.5 um/s,
Movie=11X.txt, Cells=190, CWbias=0.19, Vrun=19.8 um/s, STD_Vrun=8.1, Vx=1.3 um/s,									Movie=11X.txt, Cells=297, CWbias=0.09, Vrun=26.2 um/s, STD_Vrun=9.0, Vx=-1.6 um/s,									Movie=12X.txt, Cells=415, CWbias=0.10, Vrun=27.5 um/s, STD_Vrun=9.2, Vx=1.2 um/s,									Movie=12X.txt, Cells=333, CWbias=0.07, Vrun=20.0 um/s, STD_Vrun=6.5, Vx=-1.1 um/s,
Movie=12X.txt, Cells=267, CWbias=0.17, Vrun=18.7 um/s, STD_Vrun=7.6, Vx=-0.4 um/s,									Movie=13X.txt, Cells=377, CWbias=0.12, Vrun=29.1 um/s, STD_Vrun=10.3, Vx=1.5 um/s,									Movie=13X.txt, Cells=418, CWbias=0.12, Vrun=27.6 um/s, STD_Vrun=8.7, Vx=-1.5 um/s,									Movie=13X.txt, Cells=324, CWbias=0.09, Vrun=20.8 um/s, STD_Vrun=7.1, Vx=0.4 um/s,
Movie=13X.txt, Cells=189, CWbias=0.16, Vrun=19.2 um/s, STD_Vrun=8.2, Vx=2.0 um/s,									Movie=14X.txt, Cells=360, CWbias=0.09, Vrun=26.2 um/s, STD_Vrun=8.9, Vx=-0.2 um/s,									Movie=14X.txt, Cells=423, CWbias=0.13, Vrun=25.8 um/s, STD_Vrun=8.4, Vx=-0.3 um/s,									Movie=14X.txt, Cells=392, CWbias=0.08, Vrun=19.5 um/s, STD_Vrun=7.0, Vx=-0.8 um/s,
Movie=14X.txt, Cells=354, CWbias=0.09, Vrun=22.5 um/s, STD_Vrun=9.0, Vx=0.9 um/s,									Movie=15X.txt, Cells=469, CWbias=0.11, Vrun=26.3 um/s, STD_Vrun=9.5, Vx=0.2 um/s,									Movie=15X.txt, Cells=411, CWbias=0.13, Vrun=24.6 um/s, STD_Vrun=8.1, Vx=-0.3 um/s,									Movie=15X.txt, Cells=333, CWbias=0.14, Vrun=18.8 um/s, STD_Vrun=7.7, Vx=-0.1 um/s,
Movie=15X.txt, Cells=369, CWbias=0.12, Vrun=22.1 um/s, STD_Vrun=8.9, Vx=-0.2 um/s,									Movie=1X.txt, Cells=197, CWbias=0.18, Vrun=24.0 um/s, STD_Vrun=8.3, Vx=1.0 um/s,									Movie=20X.txt, Cells=369, CWbias=0.16, Vrun=28.5 um/s, STD_Vrun=9.5, Vx=0.2 um/s,									Movie=1X.txt, Cells=405, CWbias=0.09, Vrun=20.3 um/s, STD_Vrun=6.7, Vx=0.5 um/s,
Movie=1X.txt, Cells=198, CWbias=0.14, Vrun=20.2 um/s, STD_Vrun=7.2, Vx=-0.3 um/s,									Movie=22X.txt, Cells=308, CWbias=0.16, Vrun=23.7 um/s, STD_Vrun=8.7, Vx=-0.6 um/s,									Movie=21X.txt, Cells=431, CWbias=0.10, Vrun=27.9 um/s, STD_Vrun=8.7, Vx=-0.7 um/s,									Movie=20X.txt, Cells=349, CWbias=0.09, Vrun=20.9 um/s, STD_Vrun=8.1, Vx=-0.4 um/s,
Movie=20X.txt, Cells=255, CWbias=0.22, Vrun=17.5 um/s, STD_Vrun=6.7, Vx=0.4 um/s,									Movie=23X.txt, Cells=360, CWbias=0.16, Vrun=24.2 um/s, STD_Vrun=8.7, Vx=0.1 um/s,									Movie=22X.txt, Cells=408, CWbias=0.16, Vrun=27.0 um/s, STD_Vrun=8.9, Vx=-0.2 um/s,									Movie=21X.txt, Cells=282, CWbias=0.09, Vrun=19.0 um/s, STD_Vrun=6.7, Vx=-0.5 um/s,
Movie=21X.txt, Cells=253, CWbias=0.20, Vrun=19.0 um/s, STD_Vrun=8.2, Vx=-0.6 um/s,									Movie=24X.txt, Cells=326, CWbias=0.13, Vrun=24.7 um/s, STD_Vrun=8.7, Vx=-0.1 um/s,									Movie=23X.txt, Cells=432, CWbias=0.17, Vrun=27.3 um/s, STD_Vrun=9.1, Vx=-0.4 um/s,									Movie=22X.txt, Cells=357, CWbias=0.09, Vrun=20.4 um/s, STD_Vrun=7.8, Vx=0.8 um/s,
Movie=22X.txt, Cells=258, CWbias=0.19, Vrun=18.7 um/s, STD_Vrun=6.8, Vx=0.7 um/s,									Movie=25X.txt, Cells=350, CWbias=0.11, Vrun=25.4 um/s, STD_Vrun=8.4, Vx=-0.1 um/s,									Movie=24X.txt, Cells=374, CWbias=0.16, Vrun=25.8 um/s, STD_Vrun=8.8, Vx=0.2 um/s,									Movie=23X.txt, Cells=340, CWbias=0.12, Vrun=19.3 um/s, STD_Vrun=8.1, Vx=0.5 um/s,
Movie=24X.txt, Cells=312, CWbias=0.14, Vrun=19.2 um/s, STD_Vrun=7.5, Vx=-0.5 um/s,									Movie=2X.txt, Cells=294, CWbias=0.11, Vrun=26.1 um/s, STD_Vrun=8.4, Vx=0.4 um/s,									Movie=25X.txt, Cells=361, CWbias=0.10, Vrun=24.4 um/s, STD_Vrun=7.4, Vx=0.5 um/s,									Movie=24X.txt, Cells=306, CWbias=0.15, Vrun=18.2 um/s, STD_Vrun=7.4, Vx=-1.6 um/s,
Movie=25X.txt, Cells=323, CWbias=0.18, Vrun=19.6 um/s, STD_Vrun=7.7, Vx=-1.2 um/s,									Movie=30X.txt, Cells=194, CWbias=0.12, Vrun=24.5 um/s, STD_Vrun=9.3, Vx=-1.6 um/s,									Movie=2X.txt, Cells=341, CWbias=0.09, Vrun=28.1 um/s, STD_Vrun=9.4, Vx=-0.2 um/s,									Movie=25X.txt, Cells=302, CWbias=0.13, Vrun=18.3 um/s, STD_Vrun=7.7, Vx=0.6 um/s,
Movie=2X.txt, Cells=249, CWbias=0.16, Vrun=21.8 um/s, STD_Vrun=8.7, Vx=0.8 um/s,									Movie=31X.txt, Cells=161, CWbias=0.14, Vrun=24.9 um/s, STD_Vrun=8.6, Vx=0.1 um/s,									Movie=3X.txt, Cells=389, CWbias=0.05, Vrun=29.8 um/s, STD_Vrun=8.9, Vx=-0.2 um/s,									Movie=2X.txt, Cells=381, CWbias=0.07, Vrun=19.2 um/s, STD_Vrun=6.7, Vx=0.5 um/s,
Movie=30X.txt, Cells=181, CWbias=0.15, Vrun=18.6 um/s, STD_Vrun=6.5, Vx=1.0 um/s,									Movie=32X.txt, Cells=217, CWbias=0.15, Vrun=24.6 um/s, STD_Vrun=8.1, Vx=1.0 um/s,									Movie=4X.txt, Cells=351, CWbias=0.04, Vrun=28.0 um/s, STD_Vrun=8.4, Vx=0.1 um/s,									Movie=30X.txt, Cells=191, CWbias=0.04, Vrun=22.2 um/s, STD_Vrun=7.6, Vx=-0.6 um/s,
Movie=31X.txt, Cells=151, CWbias=0.16, Vrun=18.4 um/s, STD_Vrun=6.5, Vx=-0.9 um/s,									Movie=33X.txt, Cells=239, CWbias=0.10, Vrun=24.6 um/s, STD_Vrun=8.6, Vx=0.0 um/s,									Movie=5X.txt, Cells=357, CWbias=0.09, Vrun=27.4 um/s, STD_Vrun=8.1, Vx=-0.9 um/s,									Movie=31X.txt, Cells=225, CWbias=0.06, Vrun=21.1 um/s, STD_Vrun=7.0, Vx=-0.1 um/s,
Movie=32X.txt, Cells=214, CWbias=0.11, Vrun=20.1 um/s, STD_Vrun=7.5, Vx=0.3 um/s,									Movie=34X.txt, Cells=171, CWbias=0.17, Vrun=23.4 um/s, STD_Vrun=8.1, Vx=0.2 um/s,									Movie=6X.txt, Cells=316, CWbias=0.09, Vrun=26.0 um/s, STD_Vrun=8.4, Vx=0.2 um/s,									Movie=32X.txt, Cells=191, CWbias=0.06, Vrun=21.4 um/s, STD_Vrun=7.0, Vx=-0.0 um/s,
Movie=33X.txt, Cells=169, CWbias=0.14, Vrun=19.5 um/s, STD_Vrun=7.2, Vx=0.1 um/s,									Movie=35X.txt, Cells=247, CWbias=0.08, Vrun=25.9 um/s, STD_Vrun=8.3, Vx=-1.4 um/s,									TotalCells=6726,									Movie=34X.txt, Cells=258, CWbias=0.06, Vrun=20.6 um/s, STD_Vrun=7.2, Vx=-0.2 um/s,
Movie=34X.txt, Cells=176, CWbias=0.12, Vrun=19.3 um/s, STD_Vrun=6.9, Vx=0.3 um/s,									Movie=36X.txt, Cells=195, CWbias=0.10, Vrun=24.9 um/s, STD_Vrun=8.0, Vx=0.5 um/s,									CWbias=0.11, Vrun=27.2um/s, STD_Vrun=8.8, Vx=-0.2um/s, Vy=-0.1um/s									Movie=35X.txt, Cells=213, CWbias=0.05, Vrun=20.6 um/s, STD_Vrun=6.3, Vx=-0.0 um/s,
Movie=35X.txt, Cells=184, CWbias=0.09, Vrun=21.2 um/s, STD_Vrun=7.5, Vx=-0.2 um/s,									Movie=5X.txt, Cells=261, CWbias=0.06, Vrun=27.7 um/s, STD_Vrun=9.0, Vx=-0.6 um/s,									Run duration: fitting exp(t/Tau)=0.11 s, CWbias_LEFT=0.11, CWbias_RIGHT=0.11,									Movie=36X.txt, Cells=232, CWbias=0.10, Vrun=19.8 um/s, STD_Vrun=6.5, Vx=0.4 um/s,
Movie=3X.txt, Cells=238, CWbias=0.13, Vrun=22.1 um/s, STD_Vrun=8.0, Vx=0.6 um/s,									TotalCells=5476,									Tumble duration: fitting exp(t/Tau)=0.01 s									Movie=3X.txt, Cells=331, CWbias=0.11, Vrun=19.2 um/s, STD_Vrun=6.9, Vx=0.2 um/s,
Movie=4X.txt, Cells=203, CWbias=0.11, Vrun=22.1 um/s, STD_Vrun=7.7, Vx=-0.5 um/s,									CWbias=0.12, Vrun=25.5um/s, STD_Vrun=8.9, Vx=0.1um/s, Vy=0.1um/s									MEAN tumble angle_LEFT=54.85, MEAN tumble angle_RIGHT=52.00, Dr=0.41 rad^2/s									Movie=4X.txt, Cells=356, CWbias=0.09, Vrun=18.8 um/s, STD_Vrun=6.4, Vx=-0.7 um/s,
Movie=5X.txt, Cells=231, CWbias=0.12, Vrun=21.5 um/s, STD_Vrun=7.9, Vx=0.1 um/s,									Run duration: fitting exp(t/Tau)=0.11 s, CWbias_LEFT=0.13, CWbias_RIGHT=0.12,																		Movie=5X.txt, Cells=355, CWbias=0.08, Vrun=18.4 um/s, STD_Vrun=6.0, Vx=-1.1 um/s,
TotalCells=5441,									Tumble duration: fitting exp(t/Tau)=0.01 s																		TotalCells=7214,
CWbias=0.15, Vrun=20.2um/s, STD_Vrun=7.9, Vx=0.2um/s, Vy=-0.2um/s									MEAN tumble angle_LEFT=47.11, MEAN tumble angle_RIGHT=44.92, Dr=0.48 rad^2/s																		CWbias=0.09, Vrun=19.8um/s, STD_Vrun=7.2, Vx=-0.2um/s, Vy=-0.0um/s
Run duration: fitting exp(t/Tau)=0.12 s, CWbias_LEFT=0.15, CWbias_RIGHT=0.15,																											Run duration: fitting exp(t/Tau)=0.15 s, CWbias_LEFT=0.09, CWbias_RIGHT=0.09,
Tumble duration: fitting exp(t/Tau)=0.01 s																											Tumble duration: fitting exp(t/Tau)=0.01 s
MEAN tumble angle_LEFT=53.94, MEAN tumble angle_RIGHT=50.66, Dr=0.84 rad^2/s																											MEAN tumble angle_LEFT=47.52, MEAN tumble angle_RIGHT=45.22, Dr=0.75 rad^2/s
