# Supplementary figures and images for: Ligand sensing enhances bacterial flagellar motor output via stator recruitment
Source: eLife journal article supplement (doi:10.7554/elife.62848), 2021-04-06

A

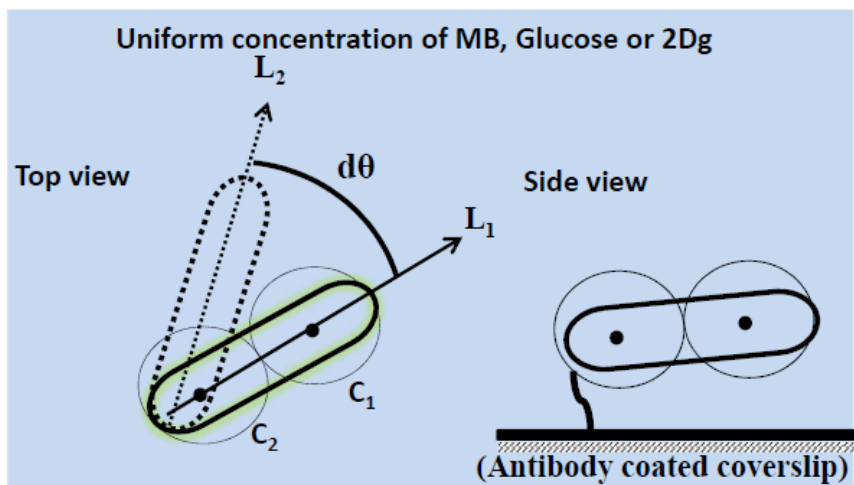

B

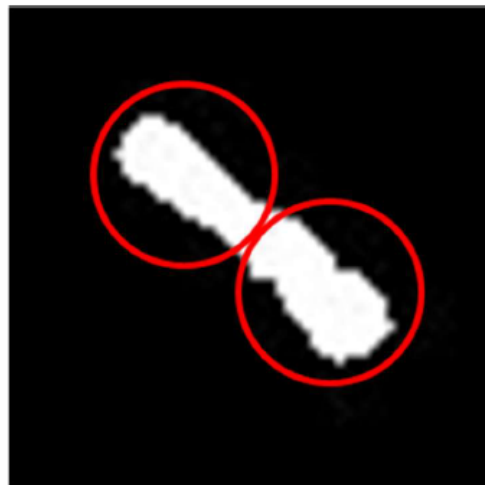

Supplement: supp [file elife-62848-supp-v1.zip › elife_poa_e62848_Figure_2_figure_supplement_1.pdf]

**BF**

**Confocal**

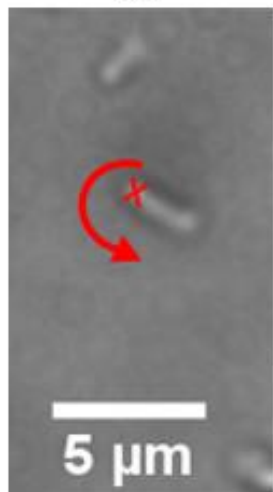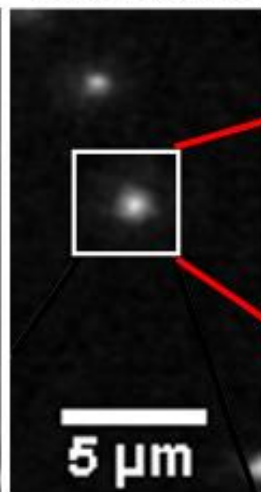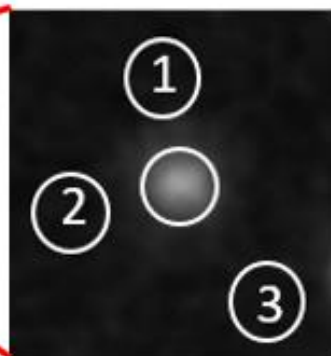

Supplement: supp [file elife-62848-supp-v1.zip › elife_poa_e62848_Figure_2_figure_supplement_2.pdf]

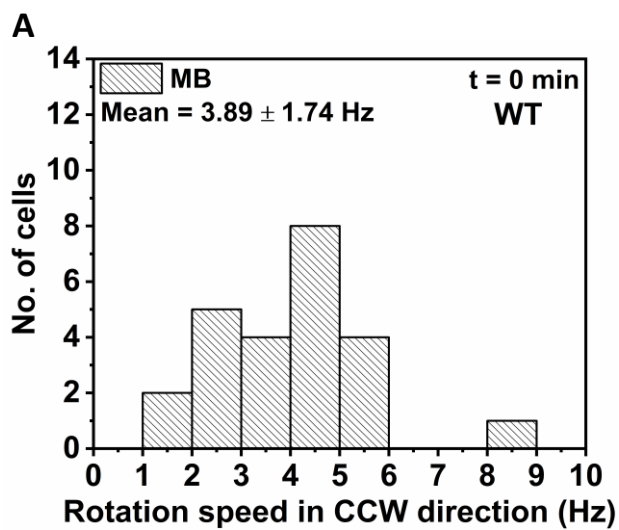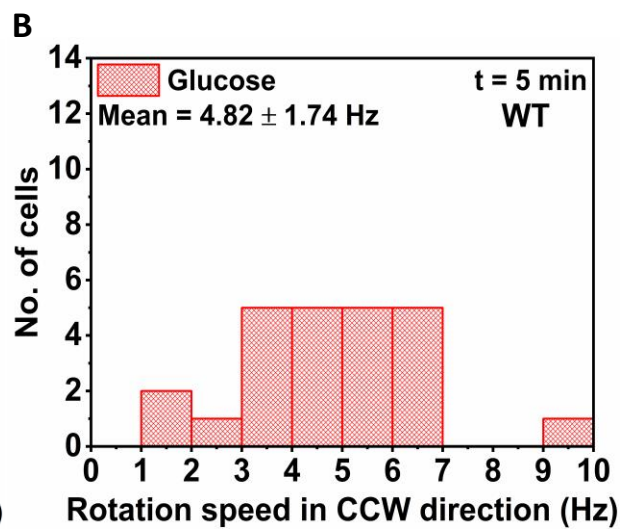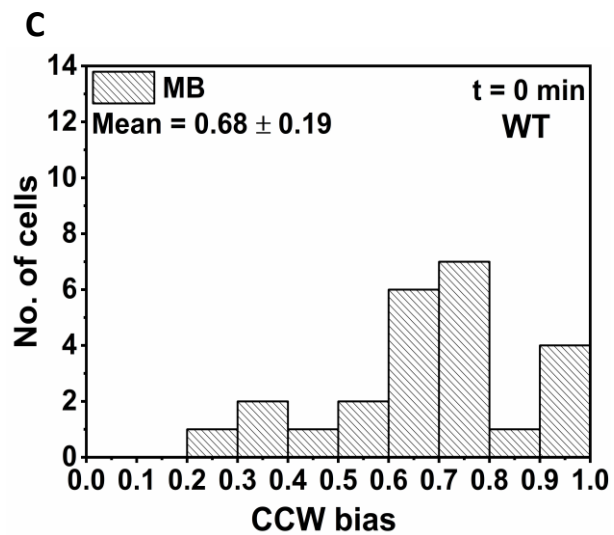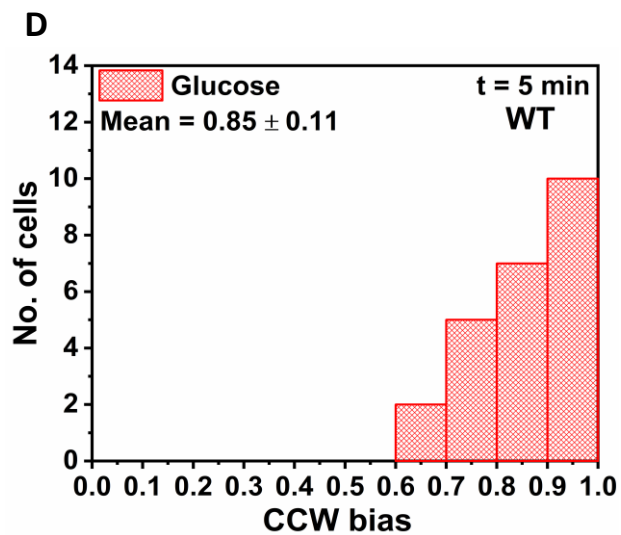

Supplement: supp [file elife-62848-supp-v1.zip › elife_poa_e62848_Figure_3_figure_supplement_1.pdf]

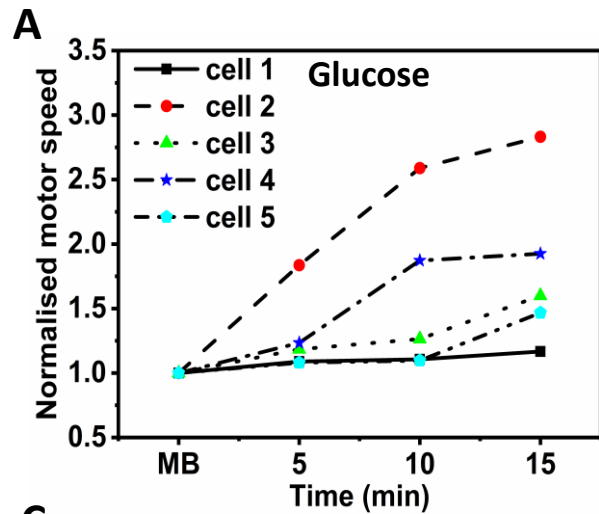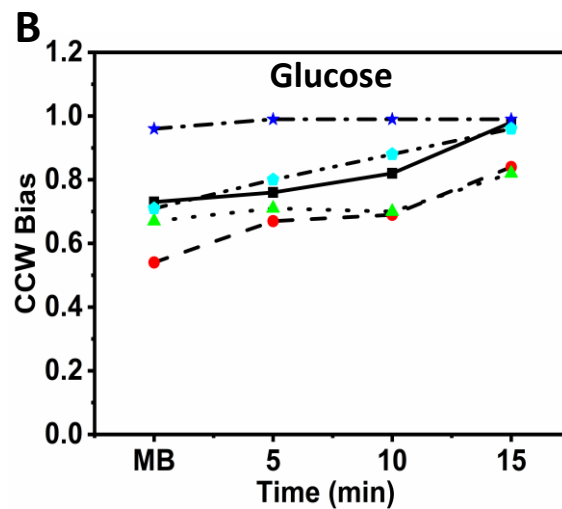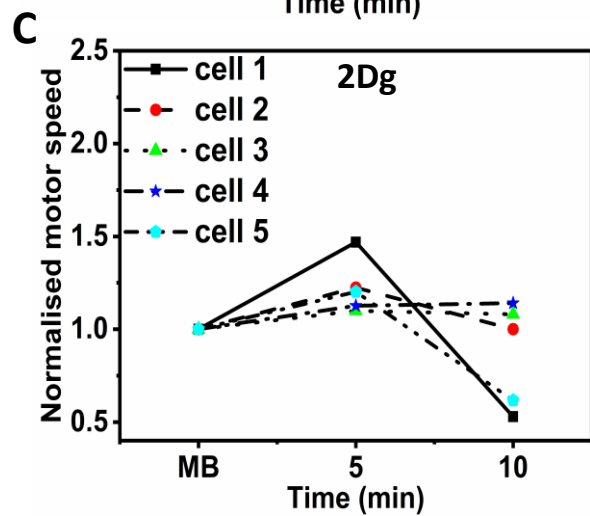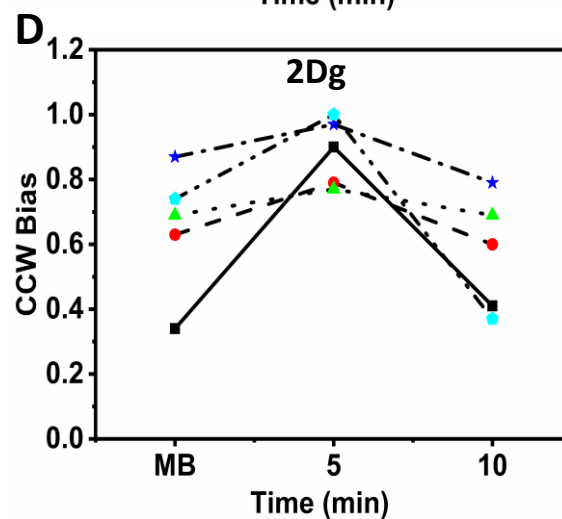

Supplement: supp [file elife-62848-supp-v1.zip › elife_poa_e62848_Figure_3_figure_supplement_2.pdf]

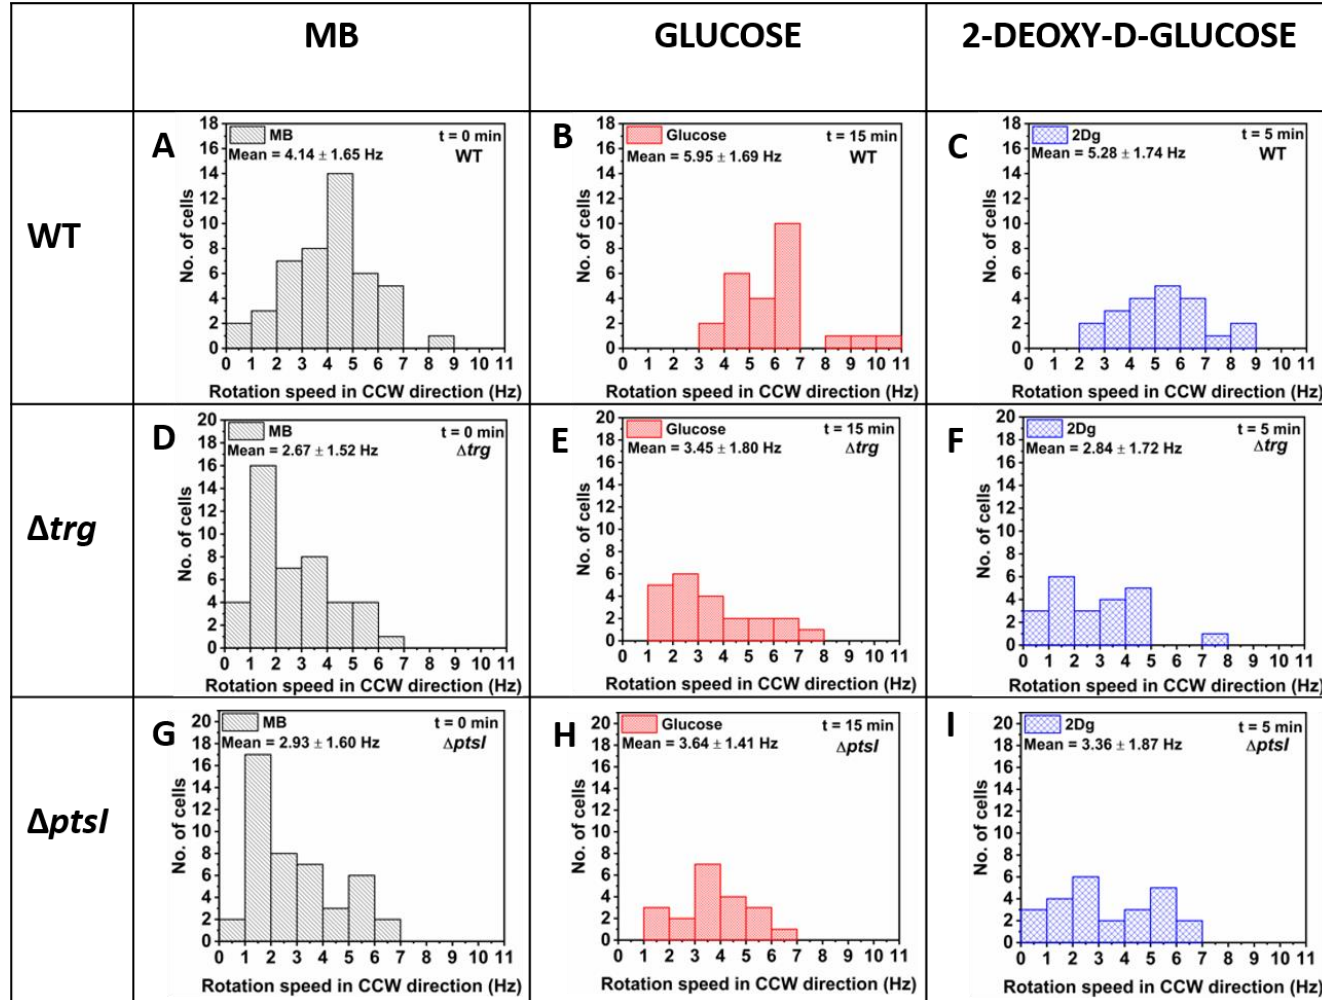

Supplement: supp [file elife-62848-supp-v1.zip › elife_poa_e62848_Figure_3_figure_supplement_3.pdf]

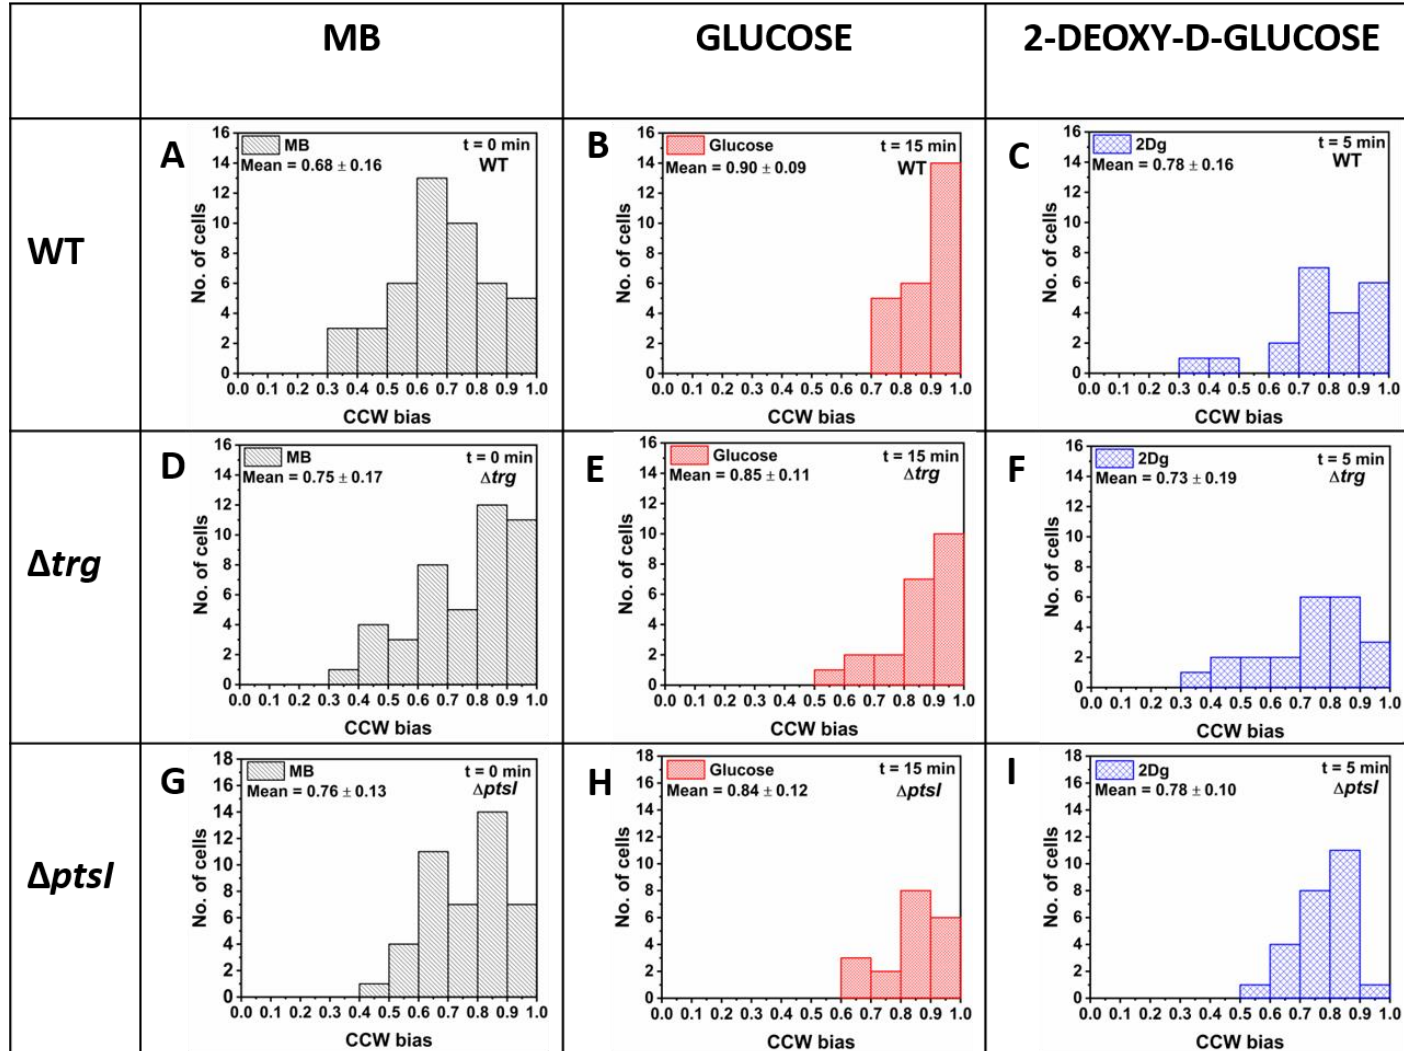

Supplement: supp [file elife-62848-supp-v1.zip › elife_poa_e62848_Figure_3_figure_supplement_4.pdf]

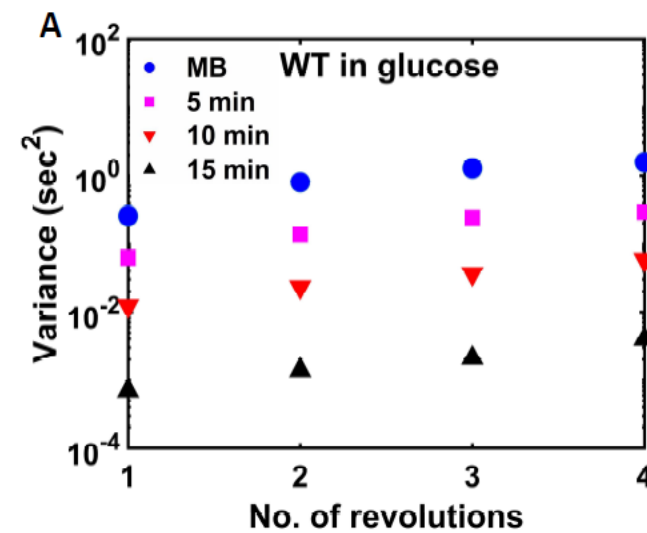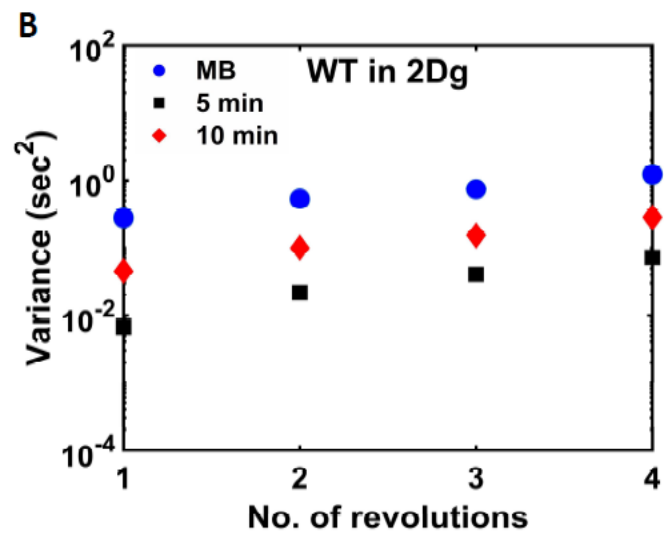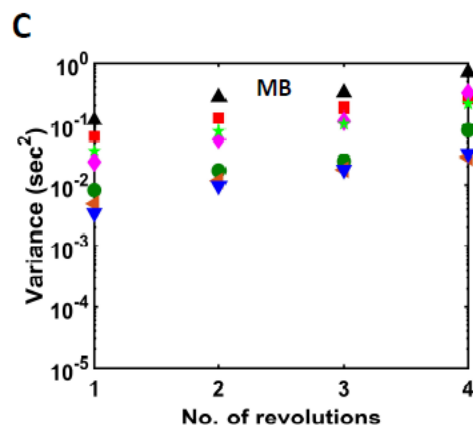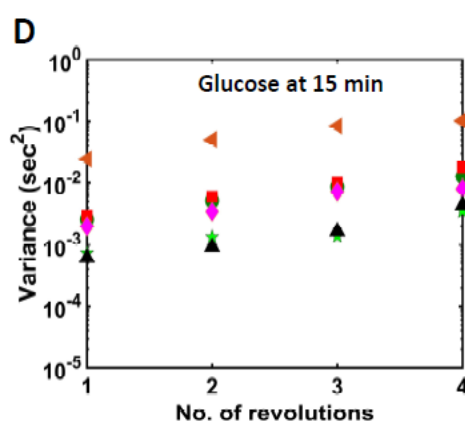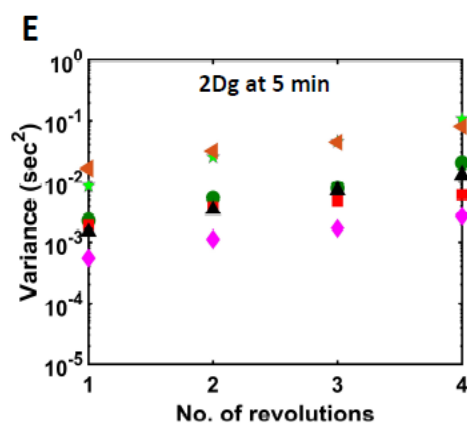

Supplement: supp [file elife-62848-supp-v1.zip › elife_poa_e62848_Figure_3_figure_supplement_5.pdf]

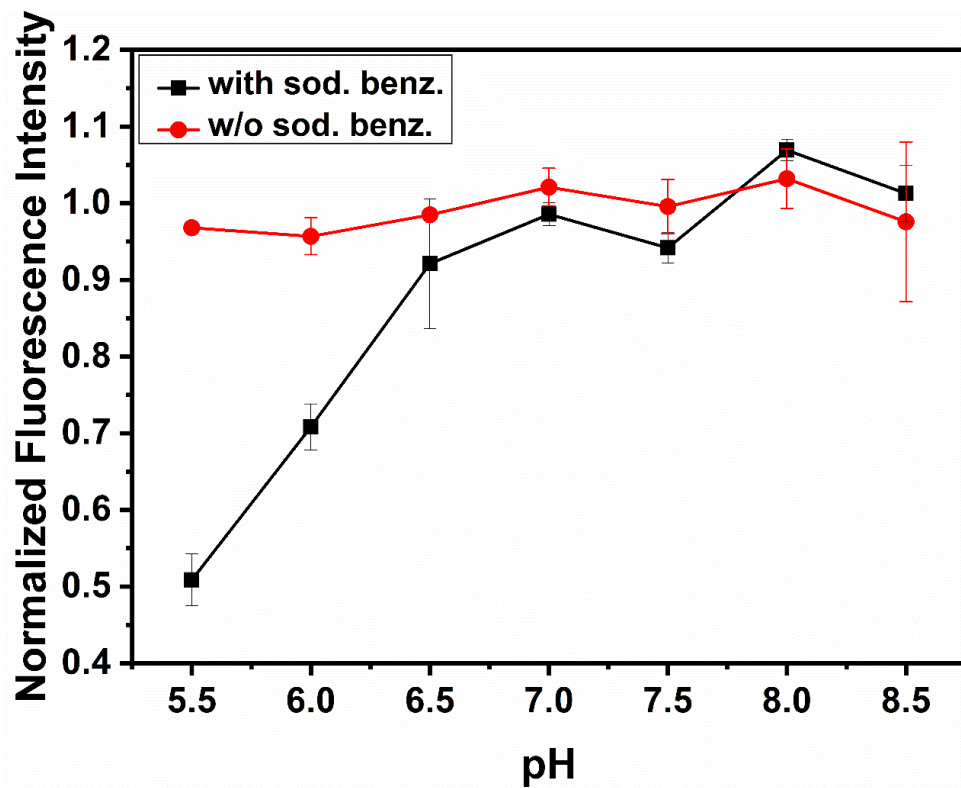

Supplement: supp [file elife-62848-supp-v1.zip › elife_poa_e62848_Figure_3_figure_supplement_6.pdf]

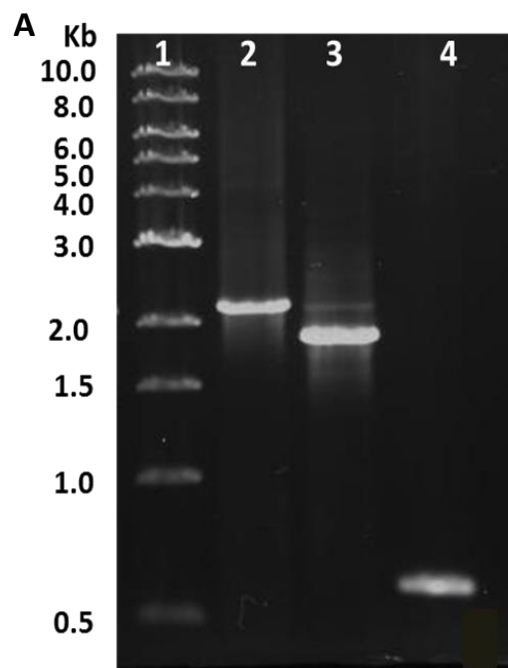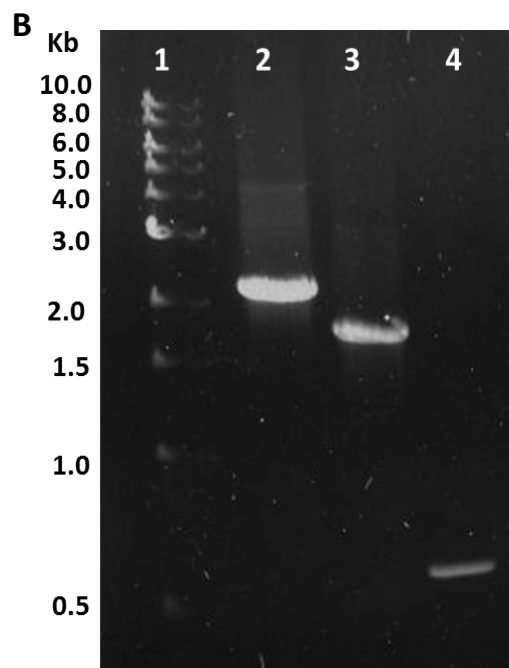

Supplement: supp [file elife-62848-supp-v1.zip › elife_poa_e62848_Figure_3_figure_supplement_7.pdf]
